# Supplementary material for: Intention-to-treat analyses and missing data approaches in pharmacotherapy trials for alcohol use disorders
Source: PubMed Central journal article supplement — BMJ Open. 2013 Nov 12;3(11):e003464. doi: 10.1136/bmjopen-2013-003464 (PMC3831108; doi:10.1136/bmjopen-2013-003464), 2013-11-12
Supplement: bmjopen-2013-003464.draft_revisions.pdf [file bmjopen-2013-003464.draft_revisions.pdf]

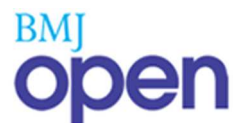

## Intention-to-Treat Analyses and Missing Data Approaches in Pharmacotherapy Trials for Alcohol Use Disorders

|                                 |                                                                                                                                                                                                                                                                           |
|---------------------------------|---------------------------------------------------------------------------------------------------------------------------------------------------------------------------------------------------------------------------------------------------------------------------|
| Journal:                        | <i>BMJ Open</i>                                                                                                                                                                                                                                                           |
| Manuscript ID:                  | bmjopen-2013-003464                                                                                                                                                                                                                                                       |
| Article Type:                   | Research                                                                                                                                                                                                                                                                  |
| Date Submitted by the Author:   | 23-Jun-2013                                                                                                                                                                                                                                                               |
| Complete List of Authors:       | Del Re, AC; VA Palo Alto, Maisel, Natalya; VA Palo Alto, Blodgett, Janet; VA Palo Alto, Finney, John; VA Palo Alto Health Care System (152MPD), Center for Health Care Evaluation; Stanford University School of Medicine, Department of Psychiatry & Behavioral Sciences |
| <b>Primary Subject Heading</b>: | Research methods                                                                                                                                                                                                                                                          |
| Secondary Subject Heading:      | Pharmacology and therapeutics, Addiction                                                                                                                                                                                                                                  |
| Keywords:                       | STATISTICS & RESEARCH METHODS, CLINICAL PHARMACOLOGY, Substance misuse < PSYCHIATRY                                                                                                                                                                                       |
|                                 |                                                                                                                                                                                                                                                                           |

SCHOLARONE™  
Manuscripts

1  
2  
3 Intention-to-Treat Analyses and Missing Data Approaches in Pharmacotherapy Trials for  
4  
5  
6 Alcohol Use Disorders  
7

8 A. C. Del Re, Natalya C. Maisel, Janet C. Blodgett, John W. Finney  
9  
10

11  
12  
13 Research Health Science Specialist, Program Evaluation Resource Center, VA Palo Alto Health  
14 Care System (152MPD), 795 Willow Rd, Menlo Park, CA 94025, acdelre@gmail.com, 650-493-  
15 5000 x2-25842, Fax: 650- 617-2736, A. C. Del Re  
16

17 Research Health Science Specialist, Center for Health Care Evaluation, VA Palo Alto Health  
18 Care System (152MPD), 795 Willow Rd, Menlo Park, CA 94025, natalya.Maisel@va.gov, 650-  
19 493-5000 (press 2 for Menlo Park, ext. 26966), Natalya C. Maisel  
20

21 Research Associate, Center for Health Care Evaluation, VA Palo Alto Health Care System  
22 (152MPD), 795 Willow Rd, Menlo Park, CA 94025, Janet.Blodgett@va.gov, 650-493-5000  
23 x27292, Janet Blodgett  
24

25 Research Health Science Specialist, Center for Health Care Evaluation, VA Palo Alto Health  
26 Care System (152MPD), 795 Willow Rd, Menlo Park, CA 94025, john.finney@va.gov, (650)  
27 493-5000 Ext. 2-22848, John W. Finney  
28  
29

30 Correspondence to: A. C. Del Re acdelre@gmail.com  
31  
32

33 Keywords: intention to treat, missing data strategies, research methods  
34  
35

36 Word count: 2,780, abstract: 326, references: 13, figures: 0, tables: 4  
37  
38  
39  
40  
41  
42  
43  
44  
45  
46  
47  
48  
49  
50  
51  
52  
53  
54  
55  
56  
57  
58  
59  
60

## Abstract

*Objective:* Intention-to-treat (ITT) is an analytic strategy for reducing potential bias in treatment effects arising from missing data in randomized controlled trials (RCT). Currently, no universally accepted definition of ITT exists, although many consider it to require either no attrition or some imputation procedure to account for missing outcome data in analyses. Using the reports of a large pool of randomized controlled trials, we examined discrepancies between the types of analyses that alcohol pharmacotherapy researchers stated they used versus those they actually used. We also examined the linkage between analytic strategy (i.e., ITT or not) and how missing data on outcomes were handled (if at all), and whether data analytic and missing data strategies have changed over time.

*Method:* Descriptive statistics were generated for reported and actual data analytic strategy and for missing data strategy for 165 RCTs of pharmacotherapy for alcohol use disorders (AUDs). In addition, generalized linear models determined changes over time in the use of ITT analyses and missing data strategies.

*Results:* Of the 165 studies, 74 reported using an ITT strategy. However, based on their reports, less than 40% of the studies actually conducted ITT according to the rigorous definition above. The most common method utilized for studies reporting ITT, but not actually using one, involved analyses of data for participants who completed what was deemed a sufficient dose of treatment. Whereas no change in the use of ITT analyses over time was found, censored (last follow-up completed) and imputed missing data strategies have increased over time, while analyses of data only for the sample actually followed have decreased over time.

*Conclusion:* Discrepancies in reporting versus actually conducting ITT analyses were found in this body of RCTs. Lack of clarity regarding the missing data strategy used was common.

1  
2  
3  
4  
5  
6  
7  
8  
9  
10  
11  
12  
13  
14  
15  
16  
17  
18  
19  
20  
21  
22  
23  
24  
25  
26  
27  
28  
29  
30  
31  
32  
33  
34  
35  
36  
37  
38  
39  
40  
41  
42  
43  
44  
45  
46  
47  
48  
49  
50  
51  
52  
53  
54  
55  
56  
57  
58  
59  
60

Consensus on a definition of ITT is important for adequate understanding of research findings.  
Clearer reporting standards for analyses and the handling of missing data in pharmacotherapy  
trials and other intervention studies are needed.

For peer review only

1  
2  
3  
4 In pharmacotherapy trials, participants typically are randomly assigned to a  
5  
6 pharmacotherapy or a placebo (control) condition. With a sufficient sample size, randomization  
7  
8 usually produces separate groups *without* systematic differences by equalizing factors within  
9  
10 groups that may be associated with outcome (e.g., motivation, age, gender). Under ideal  
11  
12 circumstances, the randomization process allows valid causal inferences to be made about the  
13  
14 impact of the pharmacotherapy compared to the control condition. That is, one can be highly  
15  
16 confident that any post-treatment differences in outcome are attributable to the impact of the  
17  
18 medication itself and not to pre-existing differences between the characteristics of the  
19  
20 pharmacotherapy and placebo samples. However, when the randomization process is disrupted,  
21  
22 either through treatment dropout and/or missing data on outcomes, or when the original sample  
23  
24 as randomized is not the same sample analyzed (analyzed N < randomized N), bias may be  
25  
26 introduced that compromises the internal validity of results.<sup>1-4</sup>  
27  
28  
29  
30  
31

32 The intention-to-treat (ITT) analytic strategy is one solution for eliminating or reducing  
33  
34 bias in treatment effects arising from missing outcome data in randomized controlled trials  
35  
36 (RCTs).<sup>1,2</sup> Although no universally accepted definition of ITT currently exists, the procedure  
37  
38 nevertheless is endorsed in the Consolidated Standards for Reporting Trials (CONSORT).<sup>5-7</sup>  
39  
40 One particularly succinct definition of a "true ITT"<sup>8</sup> analysis is "once randomized, always  
41  
42 analyzed" (Schulz and Grimes, 2002, p. 781). Under this definition, ITT involves analysis of *all*  
43  
44 trial participants who were randomized, regardless of adherence to treatment protocol (e.g.,  
45  
46 dropout/withdrawal or protocol deviations). In other words, defined this way, ITT requires either  
47  
48 no attrition or some imputation procedure to account for any missing data.  
49  
50  
51  
52

53 ITT has several strengths, including (1) helping to preserve the integrity of the  
54  
55 randomization process (i.e., groups are expected to be similar except for random variation and  
56  
57  
58  
59  
60

1  
2  
3 receipt of treatment/control condition) and (2) providing a more realistic estimate of average  
4  
5 treatment effects in the "real-world" as it is the norm for some patients to dropout or not adhere  
6  
7 to treatment.<sup>1</sup> Both points above address the issue of patient dropout, as analyses on only  
8  
9 adherent patients likely would lead to inflated estimates of treatment effects. Research has shown  
10  
11 that adherent patients generally do better than non-adherent patients, regardless of treatment.<sup>10 11</sup>  
12  
13  
14 The more realistic estimates of treatment effects under conditions of routine care that are derived  
15  
16 from ITT analyses have particular relevance for policy makers and those interested in hypotheses  
17  
18 of pragmatic ("real world") importance.  
19  
20  
21

22  
23 A variant of the ITT approach, what it termed a "modified ITT" analysis,<sup>8</sup> maintains the  
24  
25 conditions to which people were randomly assigned and attempts to follow-up all participants,  
26  
27 regardless of their participation in the intervention. However, only those successfully followed  
28  
29 are included in the analyses. With this modified approach, however, the balance in pre-existing  
30  
31 characteristics across conditions sought through random assignment is less likely to hold.  
32  
33

34  
35 An alternative to ITT analysis, the *per protocol* analytic procedure (i.e., analyses based  
36  
37 on only "adherent" participants in randomized samples), has strengths as well and is of particular  
38  
39 importance for hypotheses of an explanatory nature.<sup>12</sup> The per protocol approach can range from  
40  
41 analyses in which only those research participants who began treatment are included, to those in  
42  
43 which only participants who received what was deemed a "sufficient dose" of treatment are used,  
44  
45 to those in which only participants who fully completed treatment are included (also referred to  
46  
47 as a 'complete cases' approach).<sup>2</sup> Advocates of per protocol approach assert that the analysis  
48  
49 tests the true efficacy of the intervention when used as directed (i.e., efficacy among those who  
50  
51 are adherent and able to tolerate the treatment).  
52  
53  
54  
55  
56  
57  
58  
59  
60

1  
2  
3 Because both ITT and per protocol approaches to RCT analyses have their strengths, a  
4 possible strategy is to conduct an ITT analysis, with a per protocol sensitivity analysis to  
5  
6 “bracket” likely effects under different conditions. Nevertheless, ITT analyses are considered  
7  
8 the "gold standard" and researchers frequently report the use of this procedure in published  
9  
10 literature, even in the absence of a consensual definition. Discrepancies can arise, however,  
11  
12 between the type of analyses researchers state in research reports that they conducted and what  
13  
14 they *actually* did with respect to use of a “true” ITT analysis or some other procedure based on  
15  
16 less than the full randomized sample. For example, in clinical trials in the nursing field, Polit  
17  
18 and Gillespie<sup>8</sup> found that for 10.5% of studies, researchers who stated they had used an ITT  
19  
20 approach had actually conducted per protocol analyses.  
21  
22  
23  
24  
25

26  
27 In this review, we examined discrepancies between the types of analyses that researchers  
28  
29 stated they used and those they actually used in reports of a large pool of randomized controlled  
30  
31 trials of pharmacotherapy for alcohol use disorders published between 1970 to 2009. We also  
32  
33 examined the use of different missing data strategies in studies in which true and modified ITT  
34  
35 analyses were and were not conducted. Finally, we examined whether the use of different data  
36  
37 analytic approaches and certain types of missing data approaches (e.g., multiple imputation) has  
38  
39 increased over time while the use of others has decreased.  
40  
41  
42

## 43 **Methods**

### 44 **Literature Search**

45  
46 As part of a larger project examining the efficacy of pharmacotherapies for alcohol use  
47  
48 disorders and alcohol misuse,<sup>13</sup> we identified relevant randomized controlled trials via several  
49  
50 searches of PubMed and PsycINFO conducted at different points over the past decade. Study  
51  
52 inclusion criteria were (a) a focus on treating alcohol misuse or an alcohol use disorder; (b)  
53  
54 participants 18 years of age or older; (c) publication between 1970 and 2009; (d) a report in the  
55  
56  
57  
58  
59  
60

1  
2  
3 English language; and (e) random assignment of at least five participants each to medication and  
4  
5  
6 placebo groups.

7  
8 Searches were intermittent due to sporadic availability of funds and resources. For  
9  
10 example, in one search we used search terms for various medications (e.g., “naltrexone”), terms  
11  
12 for alcohol problems and use disorders and alcohol misuse (e.g., “alcohol\*,” “problem drinking”)  
13  
14 and terms for randomized controlled trials (e.g., “randomized controlled,” “clinical trial”). This  
15  
16 search yielded 1,602 potential research reports. Based on examination of abstracts and full text  
17  
18 versions of these reports, 1,184 were identified as not relevant (e.g., qualitative studies, reviews).  
19  
20 Of the remaining articles, 215 were rejected based on not meeting our eligibility criteria (e.g.,  
21  
22 open-label trial), 138 articles met the inclusion criteria, but 65 were additional publications for  
23  
24 studies already in the dataset (e.g., reporting secondary analyses). In addition to the database  
25  
26 searches, we pursued the reference sections from the reports of the included studies and from  
27  
28 previously published reviews of this literature. For the present analysis, a total of 165 studies met  
29  
30 our inclusion criteria  
31  
32  
33  
34  
35

### 36 **Variables**

37  
38 Descriptive and inferential statistics were generated for two categorical variables: (1) sample  
39  
40 analyzed and (2) missing data strategy. The categories of the “sample analyzed” variable were:  
41  
42

43 (1) Full random sample - analyses involved the total randomized N’s (with or without  
44  
45 imputation of missing data)

46  
47 (2) Full random sample (likely) - analyses appeared to use the full randomized sample,  
48  
49 but N’s were not reported  
50  
51  
52  
53  
54  
55  
56  
57  
58  
59  
60



1  
2  
3 (3) Random sample followed-up - attempted to follow-up all randomized participants  
4  
5 regardless of amount of medication/treatment completed and conducted analyses on this  
6  
7 sample  
8  
9

10 (4) Sufficient dose - analyses were conducted for only those participants who completed  
11  
12 a specified amount of treatment or who received at least a minimum dose of treatment  
13

14 (5) Completer sample - analyses conducted for only those patients who completed the  
15  
16 medication/treatment phase  
17

18 (6) False inclusion - after randomization, participants were found to not meet inclusion  
19  
20 criteria and were subsequently removed from the analyses  
21  
22

23 (7) Other - reported N's or degrees of freedom that were less than what would be  
24  
25 expected for the randomized N, but no explanation of the participants included or  
26  
27 excluded from the analysis was provided  
28  
29

30 (8) Unclear – insufficient information was provided to determine the sample analyzed.  
31  
32

33  
34 Only analyses conducted on the Full Random Sample or Full Random Sample (likely) categories  
35  
36 were deemed to be “true” ITT analyses, whereas the others were considered something other  
37  
38 than ITT analyses.  
39

40  
41 For those studies in which ITT analyses were actually conducted (i.e., “true” ITT with no  
42  
43 missing outcome data due to 100% reassessment rate or imputing missing data), the categories  
44  
45 for the “missing data strategy” variable were as follows:  
46  
47

48 (1) No dropout – no dropout from treatment and 100% reassessed  
49

50 (2) All followed - there were drop-outs from treatment, but all participants, including  
51  
52 treatment dropouts, were reassessed  
53  
54  
55  
56  
57  
58  
59  
60

- 1
- 2
- 3 (3) Statistical imputation - used a statistical analysis that imputed missing data, e.g.,
- 4 mixed-model imputation
- 5
- 6
- 7
- 8 (4) Failure assumed for missing data (missing = failure) - assumed that missing data
- 9 reflected poor outcome, e.g., relapse
- 10
- 11
- 12 (5) Baseline assigned - a participant's baseline score was assigned if outcome data were
- 13 missing
- 14
- 15
- 16
- 17 (6) LOCF - used the imputation strategy of Last Observation Carried Forward
- 18
- 19
- 20 (7) Censored – last assessment point was used in survival analyses
- 21
- 22 (8) Mean - used the mean of the sample followed for missing data
- 23
- 24 (9) Other – used some other imputation of missing data strategy
- 25
- 26
- 27 (10) Sample followed - conducted analyses with data for the sample of participants that
- 28 the researchers were able to follow/reassess
- 29
- 30
- 31 (11) Unclear - no or unclear information provided.
- 32
- 33

### 34 **Statistical Analyses**

35  
36 Descriptive statistics were generated for data analytic strategies and missing data  
37 strategies used in the 165 RCTs of pharmacotherapies for AUD and alcohol misuse. Generalized  
38 linear model analyses were conducted to determine changes in both data analytic and missing  
39 data strategy over time. In those analyses, the response variables, data analytic strategy and  
40 missing data strategy, were coded as binary (0='No', 1='Yes'), with year of publication as  
41 predictor of a 'Yes' response.  
42  
43  
44  
45  
46  
47  
48  
49

### 50 **Results**

51  
52  
53 As noted in Table 1, a substantial discrepancy was evident between reporting an ITT  
54 strategy versus actually conducting a “true” ITT analysis (i.e., reporting an ITT strategy when  
55  
56  
57  
58  
59  
60

1  
2  
3 something other than ITT was conducted). Of the 165 studies included in this review, 74  
4  
5 reported using an ITT strategy. However, less than half of those studies conducted a true ITT  
6  
7 analysis ( $K=29$ ; 39%) according to information in study reports. Interestingly, 35% ( $K=32$ ) of the  
8  
9 91 studies whose reports made *no* claim of using an ITT strategy, in fact, *did* perform true ITT  
10  
11 analyses.  
12  
13  
14  
15  
16  
17  
18  
19  
20  
21  
22  
23  
24  
25  
26  
27  
28  
29  
30  
31  
32  
33  
34  
35  
36  
37  
38  
39  
40  
41  
42  
43  
44  
45  
46  
47  
48  
49  
50  
51  
52  
53  
54  
55  
56  
57  
58  
59  
60

1  
2  
3  
4  
5  
6  
7  
8  
9  
10  
11  
12  
13  
14  
15  
16  
17  
18  
19  
20  
21  
22  
23  
24  
25  
26  
27  
28  
29  
30  
31  
32  
33  
34  
35  
36  
37  
38  
39  
40  
41  
42  
43  
44  
45  
46  
47  
48  
49

Table 1.

| Reported Using ITT   | Conducted True ITT <sup>a</sup> | Sample Analyzed    |                             |                  |                 |                  |                 |        |          | Total Number of ITT and/or Non-ITT Approaches Used |
|----------------------|---------------------------------|--------------------|-----------------------------|------------------|-----------------|------------------|-----------------|--------|----------|----------------------------------------------------|
|                      |                                 | Full Random Sample | Full Random Sample (likely) | Random Sample FU | Sufficient Dose | Completer Sample | False Inclusion | Other  | Unclear  |                                                    |
| <b>No (K=91)</b>     | 32 (35%)                        | 28 (25%)           | 4 (4%)                      | 6 (5%)           | 19 (17%)        | 31 (28%)         | 2 (2%)          | 4 (4%) | 16 (14%) | 112                                                |
| <b>Yes (K=74)</b>    | 29 (39%)                        | 21 (21%)           | 9 (9%)                      | 7 (7%)           | 40 (39%)        | 7 (7%)           | 8 (8%)          | 2 (2%) | 0 (0%)   | 102                                                |
| <b>Total (K=165)</b> | 61 (37%)                        | 49 (23%)           | 13 (6%)                     | 13 (6%)          | 59 (28%)        | 38 (18%)         | 10 (5%)         | 6 (3%) | 16 (8%)  | 214                                                |

Note: <sup>a</sup>ITT=Full Random Sample or Full Random Sample (likely) categories; K=study, column description: (1) Full random sample (analyses involved the total randomized N's), (2) Full random sample (likely) (appears to be using the full randomized sample, but N's are not reported with analyses), (3) Random sample followed-up (attempted to follow-up all randomized participants regardless of amount of medication/treatment completed, and conducted analyses on this sample), (4) Sufficient dose (analyses conducted on only those participants who received a minimum amount of medication/treatment), (5) Completer sample (analyses conducted on only those patients who completed the medication/treatment phase), (6) False inclusion (after randomization, participant is found to not meet inclusion criteria and is subsequently removed from the analyses), (7) Other (analyses report N's or degrees of freedom that are less than what would be expected for the randomized N, but no explanation on the participants included or excluded from the analysis is provided), and (8) Unclear (insufficient information to determine the sample analyzed). Only categories (1) Full random sample and (2) Full random sample (likely) are considered a "true" ITT strategy, whereas the others are considered something other than ITT.

1  
2  
3  
4  
5  
6  
7  
8  
9  
10  
11  
12  
13  
14  
15  
16  
17  
18  
19  
20  
21  
22  
23  
24  
25  
26  
27  
28  
29  
30  
31  
32  
33  
34  
35  
36  
37  
38  
39  
40  
41  
42  
43  
44  
45  
46  
47  
48  
49  
50  
51  
52  
53  
54  
55  
56  
57  
58  
59  
60

Regarding the specific data analytic strategy used, the values in each row of Table 1 do not sum to the total number of studies in the first column (i.e., "Reported Using ITT") due to 45 studies utilizing both ITT and non-ITT analyses (e.g., conducted an ITT analysis assuming failure for dichotomous outcomes AND also used a complete cases approach for continuous outcomes). In such instances, we coded "Reported Using ITT" as "Yes" if the study mentioned using an ITT strategy and coded it as "No" otherwise (i.e., no mention of using an ITT strategy).

The most common approach utilized in studies reporting the use of an ITT strategy, other than use of a true ITT ( $K=29$ ; 39%), involved analyses of data for participants who completed a "sufficient dose" of the medication/treatment ( $K=40$ ; 39%). All other strategies were utilized <10% of the time. The most common analytic method used in studies not mentioning an ITT strategy was actually a true ITT analysis ( $K=32$ ; 29%), followed by analyses of data from completer samples ( $K=31$ ; 28%), analyses for participants who completed a "sufficient dose" of medication/treatment ( $K=19$ ; 17%), and indeterminable strategies (i.e., Unclear;  $K=16$ ; 14%).

Table 2 reports the descriptive information on the missing data strategies employed in the studies using and not using a true ITT approach. Similar to Table 1, the values in each row of Table 2 do not sum to the total number of studies in the first column (i.e., "Conducted ITT") due to 42 studies utilizing multiple missing data strategies. The most common missing data strategy utilized in studies employing an ITT approach was either unclear ( $K=24$ ; 23%) or involved censoring data at the end of FU procedure in survival analyses ( $K=23$ ; 22%). A study could be categorized as employing an ITT strategy, but having an unclear missing data strategy if, for example, the study reported the full randomized  $N$ s from analyses, but it was unclear what particular missing data strategy was utilized. The next most frequently used strategies were

1  
2  
3 assuming missing equals relapse or some other poor outcome (“Failure”;  $K=14$ ; 13%) and using  
4  
5 a statistical imputation strategy ( $K=14$ ; 13%), such as a mixed effects model. All other missing  
6  
7 data strategies were utilized  $\leq 10\%$  of the time, except the last observation carried forward  
8  
9 (LOCF) procedure that was used in ( $K=12$ ) 11% of the studies.  
10  
11  
12  
13  
14  
15  
16  
17  
18  
19  
20  
21  
22  
23  
24  
25  
26  
27  
28  
29  
30  
31  
32  
33  
34  
35  
36  
37  
38  
39  
40  
41  
42  
43  
44  
45  
46  
47  
48  
49  
50  
51  
52  
53  
54  
55  
56  
57  
58  
59  
60

For peer review only

Table 2.

| Conducted<br>True ITT    | Missing Data Strategy     |                                |             |                         |                      |             |                                                 |                     |           |              |             | Total<br>Number of<br>ITT and/or<br>Non-ITT<br>Approaches<br>Used |
|--------------------------|---------------------------|--------------------------------|-------------|-------------------------|----------------------|-------------|-------------------------------------------------|---------------------|-----------|--------------|-------------|-------------------------------------------------------------------|
|                          | No Tx<br>or FU<br>Dropout | All FU<br>(some tx<br>dropout) | Imputed     | Missing<br>=<br>Failure | Baseline<br>Assigned | LOCF        | Censored<br>(end of FU)<br>Survival<br>Analysis | Mean<br>Substituted | Other     | Sample<br>FU | Unclear     |                                                                   |
| <b>No<br/>(K=104)</b>    | 0                         | 0                              | 6<br>(4%)   | 23<br>(17%)             | 1<br>(1%)            | 22<br>(16%) | 25<br>(18%)                                     | 3<br>(2%)           | 2<br>(1%) | 38<br>(27%)  | 17<br>(12%) | 139                                                               |
| <b>Yes<br/>(K=61)</b>    | 1<br>(1%)                 | 2<br>(2%)                      | 14<br>(13%) | 14<br>(13%)             | 1<br>(1%)            | 12<br>(11%) | 23<br>(22%)                                     | 2<br>(2%)           | 1<br>(1%) | 11<br>(10%)  | 24<br>(23%) | 105                                                               |
| <b>Total<br/>(K=165)</b> | 1<br>(>1%)                | 2<br>(>1%)                     | 20<br>(07%) | 37<br>(16%)             | 2<br>(>1%)           | 34<br>(13%) | 48<br>(19%)                                     | 5<br>(2%)           | 3<br>(1%) | 49<br>(19%)  | 41<br>(16%) | 259 <sup>a</sup>                                                  |

Note. Column description: (1) No dropout, (2) Followed-up (some dropout) (there were drop-outs from treatment, but all participants, including dropouts were followed-up), (3) Imputed (used a statistical analysis that imputed missing data, e.g., mixed-model), (4) Failure (assumed that missing data = failure, e.g., relapse), (5) Baseline assigned (assigned a person's baseline score if the outcome score was missing), (6) LOCF (used an imputation strategy of Last Observation Carried Forward), (7) Censored (end of FU) (data presented in a survival analysis), (8) Mean (used the mean for each person across available assessments/timepoints), (9) Other (other imputation strategy), (10) Sample FU (conducted analyses on the sample of participants that the researchers was able to follow-up), (11) Unclear (no information provided/unclear). It was unclear whether an ITT analysis was conducted or not for 15 analyses.

1  
2  
3  
4  
5  
6 The most common missing data method utilized in studies not conducting a true ITT  
7  
8 analysis was analyzing the sample followed-up ( $K=38$ ; 27%), followed by censoring at the end  
9  
10 of FU procedure ( $K=25$ ; 18%), assuming failure (“Failure”;  $K=23$ ; 17%), last observation carried  
11  
12 forward ( $K=23$ ; 16%) and an unclear strategy ( $K=17$ ; 12%). All other missing data strategies  
13  
14 were used  $\leq 10\%$  of the time. A study could be categorized as *not* employing an ITT strategy, but  
15  
16 still using a missing data strategy of assuming failure or last observation carried forward if, for  
17  
18 example, the study assumed failure for missing participants, but something less than the full  
19  
20 randomized  $N$ s were reported for analyses. Tables 3 and 4 display changes in ITT analyses and  
21  
22 missing data strategies over time. No statistically significant changes were found in use of true  
23  
24 ITT analyses over time (Table 3). However, several statistically significant relationships between  
25  
26 missing data strategy and time emerged, as displayed in Table 4. Specifically, censored at end of  
27  
28 FU (for survival analyses), last observation carried forward (LOCF), and using a statistical  
29  
30 analysis to impute missing data (Imputed, e.g., mixed-model) have become more common over  
31  
32 time, whereas analyses conducted on the sample of participants that the researchers were able to  
33  
34 follow-up (Sample FU) has become less common.  
35  
36  
37  
38  
39  
40  
41  
42  
43  
44  
45  
46  
47  
48  
49  
50  
51  
52  
53  
54  
55  
56  
57  
58  
59  
60



Table 3. Change in true ITT analyses over time

|             | Estimate | SE   | t-value | P     |
|-------------|----------|------|---------|-------|
| (Intercept) | -1.44    | 0.62 | -2.33   | 0.02* |
| Year        | 0.03     | 0.02 | 1.54    | 0.12  |

Note: generalized linear model with binary outcome  
(ITT analyses conducted=1 or not=0)

Table 4. Change in missing data strategy over time

|                       | Estimate | SE   | z-value | P         |
|-----------------------|----------|------|---------|-----------|
| Fail                  | 0.03     | 0.02 | 1.38    | 0.16      |
| All FU                | -0.10    | 0.09 | -1.18   | 0.24      |
| All FU (some dropout) | -0.09    | 0.06 | -1.43   | 0.15      |
| Baseline Assigned     | 0.47     | 0.36 | 1.31    | 0.19      |
| Censored (end of FU)  | 0.09     | 0.03 | 3.19    | <0.01**   |
| LOCF                  | 0.06     | 0.03 | 2.01    | 0.045*    |
| Grp Avg               | 0.07     | 0.12 | 0.62    | 0.54      |
| Mean FU points        | 0.07     | 0.07 | 0.92    | 0.36      |
| Other                 | 0.05     | 0.09 | 0.55    | 0.59      |
| Sample FU             | -0.10    | 0.02 | -4.40   | <0.001*** |
| Imputed               | 0.33     | 0.09 | 3.83    | <0.001*** |
| Unclear               | 0.02     | 0.02 | 0.94    | 0.35      |

Note: generalized linear model with binary outcome

## Discussion

Across the 165 pharmacotherapy trials included in this analysis, less than half of the 74 studies reporting to have used an ITT strategy actually did so. This finding likely is due, at least in part, to a lack of a consensual definition of what constitutes an ITT analysis. In fact, the most common procedure for studies reporting, but not actually using an ITT, involved analyses on participants who completed a sufficient dose of treatment. That is, analyses were conducted on data for only those participants who completed a certain amount of treatment or who received a minimum intervention. This type of analysis is generally considered a "per protocol" approach, which contrasts to an ITT approach which includes outcome data for all participants, regardless of adherence to treatment.<sup>2</sup>

Among the studies conducting a true ITT strategy, it was unclear what missing data strategy was used in nearly 25% of these studies. Lack of clarity in journal articles about how missing data were handled makes it difficult for readers to critically assess the study findings. A per protocol analysis answers questions of an explanatory nature, e.g., "how efficacious is this treatment for those adherent to the treatment?" In contrast, an ITT analysis provides more realistic estimates of the average treatment effects in the "real-world," as it accounts for both patient dropout and non-adherence to treatment. If findings from a per protocol analysis are incorrectly perceived as coming from an ITT analysis, treatment effects under more routine conditions of care will be overestimated. Journal editors and peer reviewers should be attentive to these issues and request that authors provide a clear description of the sample analyzed (i.e., ITT, modified ITT, per protocol) in their studies, along with details regarding how missing data were handled.

1  
2  
3 Because missing data strategies are becoming more sophisticated and are being facilitated  
4 by computer technology that is easily able to process data using complex algorithms, the  
5  
6 diversity of missing data strategies that are employed is increasing in number. Indeed, our  
7  
8 findings indicate that more complex imputation procedures are becoming more prevalent over  
9  
10 time. One such imputation procedure is Multiple Imputation<sup>3</sup>, which involves a Bayesian  
11  
12 estimation procedure to average outcomes across multiple imputed datasets. Missing data are  
13  
14 then replaced with a probable value based on other available variables in the data. Presumably,  
15  
16 the results with this approach more closely approximate the results of an ITT analysis with 100%  
17  
18 follow-up than any other method of handling missing data that is currently available.  
19  
20  
21  
22  
23

## 24 **Conclusion**

25  
26  
27 Discrepancies in reporting versus actually conducting true ITT analyses were apparent in  
28  
29 this body of alcohol pharmacotherapy trials. Lack of clarity regarding the missing data strategy  
30  
31 used also was common. The degree to which these problems are present in reports of trials of  
32  
33 pharmacotherapies and psychosocial interventions for other conditions remains to be determined.  
34  
35 In addition, consensus on a standard definition of ITT is needed, as are clearer reporting  
36  
37 standards for analyses and the handling of missing data in reports of clinical trials.  
38  
39  
40  
41  
42  
43  
44  
45  
46  
47  
48  
49  
50  
51  
52  
53  
54  
55  
56  
57  
58  
59  
60

### Acknowledgments

Preparation of this manuscript was supported by U.S. National Institute on Alcohol Abuse and Alcoholism Grant No. AA008689 and the U.S. Department of Veterans Affairs, Office of Research and Development, Health Services Research and Development Service and Substance Use Disorder Quality Enhancement Research Initiative. The views expressed are those of the authors and do not necessarily represent the views of the National Institute on Alcohol Abuse and Alcoholism, the Department of Veterans Affairs, or any other U.S. Government entity.

## Ethics

No ethics approval was required for completion of this study. It aggregated previously published journal articles.

For peer review only

**ICMJE uniform disclosure**

All authors have completed the ICMJE uniform disclosure form at [www.icmje.org/coi\\_disclosure.pdf](http://www.icmje.org/coi_disclosure.pdf) and declare: no support from any organization for the submitted work; no financial relationships with any organizations that might have an interest in the submitted work in the previous three years; no other relationships or activities that could appear to have influenced the submitted work.

### Contributorship Information

A. C. Del Re was involved in the study's design, analysis and interpretation of data, drafting the article and revising it. Natalya C. Maisel was involved in the study's design and revising the article. Janet Blodgett was involved in the study's design. John W. Finney was involved in the study's conception and design, interpretation of data, and revising it critically for important intellectual content. All authors gave final approval of the version to be published.

### Copyright/license for publication

The Corresponding Author has the right to grant on behalf of all authors and does grant on behalf of all authors, a worldwide license to the Publishers and its licensees in perpetuity, in all forms, formats and media (whether known now or created in the future), to i) publish, reproduce, distribute, display and store the Contribution, ii) translate the Contribution into other languages, create adaptations, reprints, include within collections and create summaries, extracts and/or, abstracts of the Contribution, iii) create any other derivative work(s) based on the Contribution, iv) to exploit all subsidiary rights in the Contribution, v) the inclusion of electronic links from the Contribution to third party material where-ever it may be located; and, vi) license any third party to do any or all of the above.



- 1 Gupta SK. Intention-to-treat concept: A review. *Perspect Clin Res* 2011;**2**:109–12.
- 2 Hollis S, Campbell F. What is meant by intention to treat analysis? Survey of published randomised controlled trials. *Bmj* 1999;**319**:670–4.
- 3 Little RJ, Rubin DB. *Statistical analysis with missing data*. Wiley New York 1987.
- 4 Ruiz-Canela M, Martínez-González MA, de Irala-Estévez J. Intention to treat analysis is related to methodological quality. *BMJ* 2000;**320**:1007.
- 5 Moher D, Schulz K, Altman D. The CONSORT statement: revised recommendations for improving the quality of reports of parallel group randomized trials. *Bmc Med Res Methodol* 2001;**1**:2.
- 6 Schulz KF, Altman DG, Moher D. CONSORT 2010 statement: updated guidelines for reporting parallel group randomised trials. *Int J Surg* Published Online First: 2011.<http://www.sciencedirect.com/science/article/pii/S1743919111005620> (accessed 6 Mar2013).
- 7 Zwarenstein M, Treweek S, Gagnier JJ, *et al*. Improving the reporting of pragmatic trials: an extension of the CONSORT statement. *BMJ* Published Online First: 2008.<http://www.ncbi.nlm.nih.gov/pmc/articles/PMC3266844/> (accessed 6 Mar2013).
- 8 Polit DF, Gillespie BM. Intention-to-treat in randomized controlled trials: recommendations for a total trial strategy. *Res Nurs Health* 2010;**33**:355–68.
- 9 Schulz KF, Grimes DA. Sample size slippages in randomised trials: exclusions and the lost and wayward. *The Lancet* 2002;**359**:781–5.
- 10 Avins AL, Pressman A, Ackerson L, *et al*. Placebo Adherence and Its Association with Morbidity and Mortality in the Studies of Left Ventricular Dysfunction. *J Gen Intern Med* 2010;**25**:1275–81.
- 11 Granger AL, Fehnel SE, Hogue SL, *et al*. An assessment of patient preference and adherence to treatment with Wellbutrin SR: A web-based survey. *J Affect Disord* 2006;**90**:217–21.
- 12 Schwartz D, Lellouch J. Explanatory and pragmatic attitudes in therapeutical trials. *J Clin Epidemiol* 2009;**62**:499–505.
- 13 Maisel NC, Blodgett JC, Wilbourne PL, *et al*. Meta-analysis of naltrexone and acamprosate for treating alcohol use disorders: when are these medications most helpful? *Addiction* 2013;**108**:275–93.

## BMJ

### Licence to BMJ Publishing Group Limited (“BMJ Group”) for Publication

To be agreed to by the corresponding author or guarantor on behalf of all authors (“Corresponding Author”). All authors collectively are referred to as the “Contributors”

In consideration of the BMJ Group (“the Publishers”) considering to publish the article contained within the original manuscript which includes without limitation any diagrams, photographs, other illustrative material, video, film or any other material howsoever submitted by the Contributor(s) at any time and related to the Contribution (“the Contribution”) in the BMJ (“the Journal”), certain rights are required to be granted by each different category of author(s), which are as follows:

1. For employees of the **UK Crown acting in the course of their employment**- a non exclusive Licence, as set out below. All provisions of this document apply. The non exclusivity relates to the original submitted manuscript video, films, images, photographs, diagrams and/or illustrative material only.
2. For employees of the **US Federal Government employees acting in the course of their employment**, no copyright exists and the Contribution is in the public domain so no licence is required to be granted. The Author Warranties below apply (excluding 1.iii).
3. For all other authors, an exclusive Licence, as set out below. All provisions of this document apply.

**NB** where a Contribution is a multi authored work, each author’s element of the Contribution will be dealt with in accordance with 1, 2 or 3 above, as applicable.

#### The Licence

The Licence granted in accordance with 1 or 3 above is:

A worldwide, licence, to the Publishers and its licensees in perpetuity (subject to the Reversion of Rights set out below), in all forms, formats and media (whether known now or created in the future), **to** i) publish, reproduce, distribute, display and store the Contribution, ii) translate the Contribution into other languages, create adaptations, reprints, include within collections and create summaries, extracts and/or, abstracts of the Contribution and convert or allow conversion into any format including without limitation audio, iii) create any other derivative work(s) based in whole or part on the Contribution, iv) to exploit all subsidiary rights that currently exist or as may exist in the future in the Contribution, v) the inclusion of electronic links from the Contribution to third party material where-ever it may be located; and, vi) licence any third party to do any or all of the above.

If you and/or any co-author’s employer owns the copyright to your contribution you must obtain in writing the relevant employers’ consent to grant the licence and agree to all obligations herein. The author(s) hereby agree that in the event that the BMJ Group sell, the whole or part of its journal business to any third party, the benefit and the burden of the Licence contained herein shall be assigned to that third party.

#### Additional Rights and Obligations

The author(s) (and their employers as applicable), hereby authorise the Publishers to take such steps as they consider necessary at their own expense in the copyright owners name and on their behalf, if they believe that a third party is infringing or is likely to infringe copyright or the rights granted to the Publishers herein in the Contribution without further recourse to the copyright owner(s).

For Original Research articles and Open Access Funded Articles (as both defined below), the Publishers expressly agree to place the published Contribution for display on PubMed Central (including its international mirror sites) promptly without charge to the authors or their employers (provided Pubmed Central does not charge the Publishers), which will include any Publishers’ supplied amendments or retractions.

1  
2  
3  
4  
5  
6  
7  
8  
9  
10  
11  
12  
13  
14  
15  
16  
17  
18  
19  
20  
21  
22  
23  
24  
25  
26  
27  
28  
29  
30  
31  
32  
33  
34  
35  
36  
37  
38  
39  
40  
41  
42  
43  
44  
45  
46  
47  
48  
49  
50  
51  
52  
53  
54  
55  
56  
57  
58  
59  
60

“**Original Research**” means an article reporting a research study, with a research structured abstract and normally appearing in the Research section of the BMJ. “**Open Access Funded Articles**” means articles funded in whole or part by a research grant from a government and/or charitable organisation(s) that requires open access deposit in PubMed Central. Such articles are identified by the reference to a Creative Commons licence.

The author(s) acknowledge and accept that BMJ Group may make additional changes to the contribution as considered necessary in accordance with standard editorial processes whether before or after publication. The Corresponding Author will usually see proofs for their Contributions and every effort will be made to consult with the Corresponding Author if substantial alterations are made. The BMJ Group may also retract or publish a correction or other notice when it considers this appropriate for legal or editorial reasons and this shall be at its absolute discretion which shall be exercised reasonably.

#### Reversion of Rights

If the Contribution is not published in either the print or electronic versions of the Journal or any other Publisher(s) products, within 12 months of final acceptance by the BMJ Group, (or as otherwise agreed), any Licence granted herein shall automatically terminate and all rights shall revert to the copyright owner. The Publishers may keep a copy of the Contribution as a record (including via any contractor).

#### Rights Granted to Owners of the Contribution

Ownership of copyright remains with the author(s) or their employers. All rights not expressly granted are, subject to the Licence terms, reserved by the Publishers. In return for the grant of the Licence herein, the copyright owner(s) shall have the following rights for **non-Commercial Use (unless otherwise stated)** of the Contribution:

1. The right to reproduce a reasonable number (no more than 100) print copies of the final Contribution, by copying or downloading from the BMJ Group website, for personal use and to send copies to colleagues in print or electronic form provided no fee is charged and this is not done on a systematic basis (which includes via mass e-mailings).

2. The right to include the Contribution in a compilation for classroom use (course packs) to be distributed free of charge (other than for direct photocopying cost) to students at the Contributor(s)'s institution or to be stored in digital format in data rooms for access by students as part of their course work and for in house training programmes of the Contributor(s)'s employer or at seminars or conferences subject to a limit of 100 copies per conference or seminar.

3. For all articles (excluding articles commissioned by the Publishers), the right to post a version of the final published version of the Contribution, or any abstract of the final published Contribution on the Contributor(s)'s own and/or his/her institution's website after the Publisher's publication.

4. For all Publisher commissioned articles, the right to post a version of the final published version of the Contribution, or any abstract of the final published Contribution on the Contributor(s)'s own and/or his/her institution's website 12 months after publication.

5. The following statement must accompany the articles posted on the Contributor(s)'s and/or his/her institution's website:

“This article has been published in the BMJ [insert full citation reference] and can also be viewed on the journal's website at [www.bmj.com](http://www.bmj.com)”

6. In addition, for Original Research articles and Open Access Funded Articles copyright owners (and the Publishers) may and may allow third parties to use the Contribution in accordance one of the following Creative Commons licences depending on the source of the research funding as per below:

a) where the Original Research article and/or Open Access Funded Articles **is not** funded by the Wellcome Trust or UK Research Council, the articles may be re-used under the terms of the Creative Commons Attribution-Non Commercial 3.0 Unported (CC BY-NC 3.0) see:

<http://creativecommons.org/licenses/by-nc/3.0/>

1  
2  
3 and

4 <http://creativecommons.org/licenses/by-nc/3.0/legalcode>

5 or any updated versions as determined by the Publisher from time to time.

6  
7 or

8 b) where the Original Research article and/or Open Access Funded Articles is funded by the Wellcome  
9 Trust or UK Research Council, the Contribution may be re-used under the terms of the Creative  
10 Commons Attribution 3.0 Unported Licence (CC BY 3.0) see:

11 <http://creativecommons.org/licenses/by/3.0/>

12  
13 and

14 <http://creativecommons.org/licenses/by/3.0/legalcode>

15 or any updated versions as determined by the Publisher from time to time

16  
17  
18 subject to ensuring the Publishers and the Journal are referenced (including a full citation) as set out  
19 above; all third party rights within all images, diagrams, photograph, other illustrative material or  
20 films, not owned by the authors or BMJ Group are cleared independently and appropriately; and all the  
21 Publishers trademarks are removed from any derivative works and ensuring any translations, for which  
22 a prior translation agreement with BMJ Group has not been established, must prominently display the  
23 statement: “This is an unofficial translation of an article that appeared in a BMJ Group publication.  
24 BMJ Group has not endorsed this translation”.

25  
26 7. The right to publish with the necessary acknowledgement of the Publishers and the Journal, all or  
27 part of the material from the published Contribution in a book, essay, position paper, or other non peer  
28 reviewed publication authored or edited by the Contributor(s)’s (which may be a Commercial Use).  
29 This does not apply to multiple Contributions in the same journal, for which permission from the  
30 Publishers must be sought.

31  
32 8. The right to use selected figures and tables and (of which the author or his employer owns or has  
33 licensed) and selected text (up to 300 words) from the Contribution for incorporation within another  
34 work published in print or digital format by a third party, so long as full credit is given to the Publishers  
35 and use of the parts of the Contribution is non Commercial Use.

36  
37 9. Subject to it not being contrary to English law to do so (such as for example where the UK has  
38 trading or other bans with the country of the Corresponding Authors origin or certain groups of people  
39 within), the right to receive a royalty for up to 5 years from publication of 10% of any net receipts less  
40 sales commission on single orders in excess of £2000 received by the Publisher for any single  
41 Contribution reprint or translation sales to a single third party, subject however to any fee being  
42 determined (if charged) at the absolute discretion of the Publishers as may be altered from time to time.  
43 If the Publishers receive such an order for reprint sales of the Contribution, they will contact the  
44 Corresponding Author at the address given on the published Contribution to find out to whom payment  
45 should be made. Corresponding Authors have the responsibility to ensure that all authors have agreed  
46 what should be done with any such royalty payment and to keep the Publisher updated with current  
47 contact details.

48 For permission to use materials that are beyond permitted here, visit <http://www.bmj.com/about-bmj/resources-readers/permissions>

49 “Commercial Use” includes:

- 50 - copying or downloading of documents, or linking to such postings, for further  
51 redistribution, sale or licensing, for a fee;
- 52 - copying, downloading or posting by a site or service that incorporates advertising  
53 with such content;
- 54 - the inclusion or incorporation of document content in other works or services (other  
55 than for legally permitted quotations with an appropriate citation) that is then  
56 available for sale or licensing, for a fee.
- 57 - use of documents or document content (other than for legally permitted quotations  
58 with appropriate citations) by organisations for any promotional or advertising  
59

purposes whether direct or indirect, whether for a fee or otherwise. Distribution by or on behalf of pharmaceutical organisations is considered in all cases as Commercial Use;

- use for the purposes of monetary reward by means of sale, resale, license, loan, hire transfer or other form of commercial exploitation.

#### Author warranties

1. The author(s) warrant that: i) they are the sole author(s) of the Contribution which is an original work; ii) the whole or a substantial part of the Contribution has not previously been published; iii) they or their employers are the copyright owners of the Contribution; iv) to the best of their knowledge that the Contribution does not contain anything which is libellous, illegal or infringes any third party's copyright or other rights; v) that they have obtained all necessary written consents for any patient information which is supplied with the Contribution and vi) that they have declared or will accurately declare all competing interests to the Publisher.

#### Anti Bribery

As a service provider to the BMJ Group, you agree that you shall: (a) comply with all applicable laws, statutes, regulations and codes relating to anti-bribery and anti-corruption including but not limited to the Bribery Act 2010 (Relevant Requirements); b) not engage in any activity, practice or conduct which would constitute an offence under sections 1, 2 or 6 of the Bribery Act 2010 (as amended) if such activity, practice or conduct had been carried out in the UK; (c) comply with any Publisher Ethics and Anti-bribery Policy supplied to you from time to time including as contained as follows (Relevant Policies):

<http://group.bmj.com/group/about/corporate/Anti-Bribery%20and%20Corruption%20Policy%20August%202012.pdf>;

(d) promptly report to the Chief Executive Officer or Chairman of the Publisher any request or demand for any undue financial or other advantage of any kind received by you in connection with the performance of this Agreement; Breach of this Clause shall be deemed a material breach of this Agreement.

#### Law and Jurisdiction

To the fullest extent permitted by law, this Agreement will be governed by the laws of England and shall be governed and construed in accordance with the laws of England whose courts shall have exclusive jurisdiction, unless as at the date of formation of this Agreement either i) an English judgement could not be enforced in the Corresponding Author's stated country location; or ii) it would take six months or more for the BMJ Group to enforce an English judgement in the Corresponding Author's stated country location, then it is hereby agreed that this Agreement shall be governed by the laws of the Corresponding Author's stated country (or state if applicable) and their courts shall have jurisdiction. Notwithstanding any of the above, this clause is governed by the laws of England.

#### The following statement must be included in your manuscript, together with the relevant tick box line below:

"I [*insert full name*] The Corresponding Author of this article contained within the original manuscript which includes any diagrams & photographs within and any related or stand alone film submitted (the Contribution") has the right to grant on behalf of all authors and does grant on behalf of all authors, a licence to the BMJ Publishing Group Ltd and its licencees, to permit this Contribution (if accepted) to be published in the BMJ and any other BMJ Group products and to exploit all subsidiary rights, as set out in our licence set out at: <http://www.bmj.com/about-bmj/resources-authors/forms-policies-and-checklists/copyright-open-access-and-permission-reuse>."

*IF YOU ARE A NATIONAL INSTITUTE OF HEALTH ("NIH") EMPLOYEE, CONTRACTOR OR TRAINEE* the following cover sheet will be accepted by the BMJ Group and NIH and incorporated into the above Licence.

Please tick **one or more** boxes as appropriate:

- I am the sole author of the Contribution.
- I am one author signing on behalf of all co-owners of the Contribution.
- The Contribution has been made in the course of my employment and I am signing as authorised by my employer.

1  
2  
3  
4  
5  
6  
7  
8  
9  
10  
11  
12  
13  
14  
15  
16  
17  
18  
19  
20  
21  
22  
23  
24  
25  
26  
27  
28  
29  
30  
31  
32  
33  
34  
35  
36  
37  
38  
39  
40  
41  
42  
43  
44  
45  
46  
47  
48  
49  
50  
51  
52  
53  
54  
55  
56  
57  
58  
59  
60

- x I am a US Federal Government employee acting in the course of my employment.
- I am not a US Federal Government employee, but some or all of my co-authors are.
- I am an employee of the UK Crown\* acting in the course of my employment
- I am a US Federal Government employee acting in the course of my employment.
- I am not a US Federal Government employee, but some or all of my co-authors are.
- I am an employee of the UK Crown acting in the course of my employment
- I am not an employee of the UK Crown acting in the course of my employment but some/all of my co-authors are.\*

\*Such authors should consult guidance and if necessary return any completed form.

For peer review only

## Article summary

### Intention-to-Treat Analyses and Missing Data Approaches in Pharmacotherapy Trials for Alcohol Use Disorders

A. C. Del Re, Natalya C. Maisel, Janet Blodgett, John W. Finney

#### 1) Article Focus

Using the reports of a large pool of randomized controlled trials, we examined:

- Linkage between analytic strategy (i.e., ITT or not)
- How missing data on outcomes were handled (if at all)
- Whether data analytic and missing data strategies have changed over time.

#### 2) Key Messages

- Less than 40% of the studies actually conducted ITT
- The most common method utilized for studies reporting ITT, but not actually using one, involved analyses of data for participants who completed what was deemed a sufficient dose of treatment.
- Whereas no change in the use of ITT analyses over time was found, censored (last follow-up completed) and imputed missing data strategies have increased over time, while analyses of data only for the sample actually followed have decreased over time.

#### 3) Strengths

- Examined a large body of RCT pharmacotherapy trials for alcohol misuse

#### Limitations

- Descriptive analyses could not determine whether there is any relationship between ITT and effect sizes



**Intention-to-Treat Analyses and Missing Data Approaches in  
Pharmacotherapy Trials for Alcohol Use Disorders**

|                                 |                                                                                                                                                                                                                                                                           |
|---------------------------------|---------------------------------------------------------------------------------------------------------------------------------------------------------------------------------------------------------------------------------------------------------------------------|
| Journal:                        | <i>BMJ Open</i>                                                                                                                                                                                                                                                           |
| Manuscript ID:                  | bmjopen-2013-003464.R1                                                                                                                                                                                                                                                    |
| Article Type:                   | Research                                                                                                                                                                                                                                                                  |
| Date Submitted by the Author:   | 27-Aug-2013                                                                                                                                                                                                                                                               |
| Complete List of Authors:       | Del Re, AC; VA Palo Alto, Maisel, Natalya; VA Palo Alto, Blodgett, Janet; VA Palo Alto, Finney, John; VA Palo Alto Health Care System (152MPD), Center for Health Care Evaluation; Stanford University School of Medicine, Department of Psychiatry & Behavioral Sciences |
| <b>Primary Subject Heading</b>: | Research methods                                                                                                                                                                                                                                                          |
| Secondary Subject Heading:      | Pharmacology and therapeutics, Addiction                                                                                                                                                                                                                                  |
| Keywords:                       | STATISTICS & RESEARCH METHODS, CLINICAL PHARMACOLOGY, Substance misuse < PSYCHIATRY                                                                                                                                                                                       |
|                                 |                                                                                                                                                                                                                                                                           |

SCHOLARONE™  
Manuscripts



1  
2  
3 Intention-to-Treat Analyses and Missing Data Approaches in Pharmacotherapy Trials for  
4  
5  
6 Alcohol Use Disorders

7  
8 A. C. Del Re, Natalya C. Maisel, Janet C. Blodgett, John W. Finney  
9

10  
11  
12 Research Health Science Specialist, Center for Health Care Evaluation, VA Palo Alto Health  
13 Care System (152MPD), 795 Willow Rd, Menlo Park, CA 94025, aaron.delre@va.gov, 650-493-  
14 5000 x2-25842, Fax: 650- 617-2736, A. C. Del Re  
15

16  
17 Research Health Science Specialist, Center for Health Care Evaluation, VA Palo Alto Health  
18 Care System (152MPD), 795 Willow Rd, Menlo Park, CA 94025, natalya.maisel@va.gov, 650-  
19 493-5000 x2-26966, Natalya C. Maisel  
20

21 Research Associate, Center for Health Care Evaluation, VA Palo Alto Health Care System  
22 (152MPD), 795 Willow Rd, Menlo Park, CA 94025, janet.blodgett@va.gov, 650-493-5000 x2-  
23 27292, Janet Blodgett  
24

25 Research Health Science Specialist, Center for Health Care Evaluation, VA Palo Alto Health  
26 Care System (152MPD), 795 Willow Rd, Menlo Park, CA 94025, john.finney@va.gov, (650)  
27 493-5000 x2-22848, John W. Finney  
28

29  
30 Correspondence to: A. C. Del Re aaron.delre@va.gov  
31

32  
33 Keywords: intention to treat, missing data strategies, research methods  
34

35  
36 Word count: 3,557, abstract: 298, references: 12, figures: 1, tables: 4  
37  
38  
39  
40  
41  
42  
43  
44  
45  
46  
47  
48  
49  
50  
51  
52  
53  
54  
55  
56  
57  
58  
59  
60

**Abstract**

*Objectives:* Intention-to-treat (ITT) is an analytic strategy for reducing potential bias in treatment effects arising from missing data in randomized controlled trials (RCT). Currently, no universally accepted definition of ITT exists, although many researchers consider it to require either no attrition or some imputation procedure to account for missing outcome data in analyses. Using the reports of a large pool of randomized controlled trials, we examined discrepancies between the types of analyses that alcohol pharmacotherapy researchers stated they used versus those they actually used. We also examined the linkage between analytic strategy (i.e., ITT or not) and how missing data on outcomes were handled (if at all), and whether data analytic and missing data strategies have changed over time.

*Design:* Descriptive statistics were generated for reported and actual data analytic strategy and for missing data strategy. In addition, generalized linear models determined changes over time in the use of ITT analyses and missing data strategies.

*Setting:* N/A

*Participants:* 165 RCTs of pharmacotherapy for alcohol use disorders.

*Primary and secondary outcome measures:* N/A

*Results:* Of the 165 studies, 74 reported using an ITT strategy. However, less than 40% of the studies actually conducted ITT according to the rigorous definition above. Whereas no change in the use of ITT analyses over time was found, censored (last follow-up completed) and imputed missing data strategies have increased over time, while analyses of data only for the sample actually followed have decreased.

*Conclusions:* Discrepancies in reporting versus actually conducting ITT analyses were found in this body of RCTs. Lack of clarity regarding the missing data strategy used was common. Consensus on a definition of ITT is important for adequate understanding of research findings.

1  
2  
3  
4  
5  
6  
7  
8  
9  
10  
11  
12  
13  
14  
15  
16  
17  
18  
19  
20  
21  
22  
23  
24  
25  
26  
27  
28  
29  
30  
31  
32  
33  
34  
35  
36  
37  
38  
39  
40  
41  
42  
43  
44  
45  
46  
47  
48  
49  
50  
51  
52  
53  
54  
55  
56  
57  
58  
59  
60

Clearer reporting standards for analyses and the handling of missing data in pharmacotherapy trials and other intervention studies are needed.

For peer review only

1  
2  
3  
4  
5  
6  
7  
8  
9  
10  
11  
12  
13  
14  
15  
16  
17  
18  
19  
20  
21  
22  
23  
24  
25  
26  
27  
28  
29  
30  
31  
32  
33  
34  
35  
36  
37  
38  
39  
40  
41  
42  
43  
44  
45  
46  
47  
48  
49  
50  
51  
52

In pharmacotherapy trials, participants typically are randomly assigned to a pharmacotherapy or a placebo (control) condition. With a sufficient sample size, randomization usually produces separate groups *without* systematic differences by equalizing factors within groups that may be associated with outcome (e.g., motivation, age, gender). Under ideal circumstances, the randomization process allows valid causal inferences to be made about the impact of the pharmacotherapy compared to the control condition. That is, one can be highly confident that any post-treatment differences in outcome are attributable to the impact of the medication itself and not to pre-existing differences in the characteristics of the pharmacotherapy and placebo samples. However, when the randomization process is disrupted, either through treatment dropout and/or missing data on outcomes, or when the original sample as randomized is not the same sample analyzed (analyzed N < randomized N), bias may be introduced that compromises the internal validity of results. [1–4]

32  
33  
34  
35  
36  
37  
38  
39  
40  
41  
42  
43  
44  
45  
46  
47  
48  
49  
50  
51  
52

The intention-to-treat (ITT) analytic strategy is one solution for eliminating or reducing bias in treatment effects arising from missing outcome data in randomized controlled trials (RCTs). [1,2] Although no universally accepted definition of ITT currently exists, the procedure nevertheless is endorsed in the Consolidated Standards for Reporting Trials (CONSORT). [5–7] One particularly succinct definition of a "true ITT" [8] analysis is "once randomized, always analyzed." [9] Under this definition, ITT involves analysis of *all* trial participants who were randomized, regardless of adherence to treatment protocol (e.g., dropout/withdrawal or protocol deviations). In other words, defined this way, ITT requires either no attrition or some imputation procedure to account for any missing data.

53  
54  
55  
56  
57  
58  
59  
60

ITT has several strengths, including (1) helping to preserve the integrity of the randomization process (i.e., groups are expected to be similar except for random variation and

1  
2  
3 receipt of treatment/control condition) and (2) providing a more realistic estimate of average  
4 treatment effects in the "real-world" as it is the norm for some patients to dropout or not adhere  
5 to treatment. [1] Both points above address the issue of patient dropout, as analyses on only  
6 adherent patients likely would lead to inflated estimates of treatment effects. Research has shown  
7 that adherent patients generally do better than non-adherent patients, regardless of treatment.  
8 [10,11] The more realistic estimates of treatment effects under conditions of routine care that are  
9 derived from ITT analyses have particular relevance for policy makers and those interested in  
10 hypotheses of pragmatic ("real world") importance.  
11  
12  
13  
14  
15  
16  
17  
18  
19  
20  
21

22 A variant of the ITT approach, what Polit and Gillespie (2010) term a "modified ITT"  
23 analysis, maintains the conditions to which people were randomly assigned and attempts to  
24 follow-up all participants, regardless of their participation in the intervention. However, only  
25 those successfully followed are included in the analyses. With this modified approach, however,  
26 the balance in pre-existing characteristics across conditions sought through random assignment is  
27 less likely to hold.  
28  
29  
30  
31  
32  
33  
34  
35

36 An alternative to ITT analysis, the *per protocol* analytic procedure (i.e., analyses based  
37 on only "adherent" participants in randomized samples), has strengths as well and is of particular  
38 importance for hypotheses of an explanatory nature.[12] The per protocol approach can range  
39 from analyses in which only those research participants who began treatment are included, to  
40 those in which only participants who received what was deemed a "sufficient dose" of treatment  
41 are used, to those in which only participants who fully completed treatment are included also  
42 referred to as a 'complete cases' approach[also referred to as a 'complete cases' approach; 2].  
43  
44  
45  
46  
47  
48  
49  
50  
51  
52  
53 Advocates of per protocol approach assert that the analysis tests the true efficacy of the  
54  
55  
56  
57  
58  
59  
60

1  
2  
3 intervention when used as directed (i.e., efficacy among those who are adherent and able to  
4 tolerate the treatment).  
5  
6

7  
8 Because both ITT and per protocol approaches to RCT analyses have their strengths, a  
9 possible strategy is to conduct an ITT analysis, with a per protocol sensitivity analysis to  
10 “bracket” likely effects under different conditions. Nevertheless, ITT analyses are considered  
11 the "gold standard" and researchers frequently report the use of this procedure in published  
12 literature, even in the absence of a consensual definition. Discrepancies can arise, however,  
13 between the type of analyses researchers state in research reports that they conducted and what  
14 they *actually* did with respect to use of a “true” ITT analysis or some other procedure based on  
15 less than the full randomized sample. For example, in clinical trials in the nursing field, Polit  
16 and Gillespie (2009) found that for 10.5% of studies, researchers who stated they had used an  
17 ITT approach had actually conducted per protocol analyses.  
18  
19  
20  
21  
22  
23  
24  
25  
26  
27  
28  
29  
30

31  
32 It is unknown to what degree ITT strategies are being employed in pharmacotherapy for  
33 alcohol use disorders. One aim of this review was to determine if there are discrepancies between  
34 the types of analyses that researchers stated they used and those they actually used, based on  
35 information in reports of a large pool of randomized controlled trials of pharmacotherapy for  
36 alcohol use disorders published between 1970 to 2009. A second aim was to describe the use of  
37 different missing data strategies in studies in which true and modified ITT analyses were and  
38 were not conducted. The final aim was to determine whether the use of different data analytic  
39 approaches and certain types of missing data approaches (e.g., multiple imputation) has  
40 increased over time while the use of others has decreased.  
41  
42  
43  
44  
45  
46  
47  
48  
49  
50  
51

## 52 **Methods**

### 53 **Literature Search**

1  
2  
3 As part of a larger project examining the efficacy of pharmacotherapies for alcohol use  
4 disorders and alcohol misuse, [i.e., 13] we identified relevant randomized controlled trials via  
5 several searches of PubMed and PsycINFO conducted at different points over the past decade.  
6  
7  
8  
9  
10 Study inclusion criteria were (a) a focus on treating alcohol misuse or an alcohol use disorder;  
11  
12 (b) participants 18 years of age or older; (c) publication between 1970 and 2009; (d) a report in  
13  
14 the English language; and (e) random assignment of at least five participants each to medication  
15  
16 and placebo groups. The details of inclusion/exclusion criteria can be found in Maisel et al.[12]  
17  
18  
19

20 Searches were intermittent due to sporadic availability of funds and resources. For  
21  
22 example, in one search we used search terms for various medications (e.g., “naltrexone”), terms  
23  
24 for alcohol problems and use disorders and alcohol misuse (e.g., “alcohol\*,” “problem drinking”)  
25  
26 and terms for randomized controlled trials (e.g., “randomized controlled,” “clinical trial”). This  
27  
28 search yielded 1,602 potential research reports. Based on examination of abstracts and, in some  
29  
30 cases, full text versions of these reports, 1,184 were identified as not relevant (e.g., qualitative  
31  
32 studies, reviews). Of the remaining articles, 215 were rejected based on not meeting our  
33  
34 eligibility criteria (e.g., open-label trial), 138 articles met the inclusion criteria, but 65 were  
35  
36 additional publications for studies already in the dataset (e.g., reporting secondary analyses). In  
37  
38 addition to the database searches, we pursued the reference sections from the reports of the  
39  
40 included studies and from previously published reviews of this literature. For the present  
41  
42 analysis, a total of 165 studies met our inclusion criteria  
43  
44  
45  
46  
47

## 48 **Variables**

49  
50 Descriptive and inferential statistics were generated for two categorical variables: (1) sample  
51  
52 analyzed and (2) missing data strategy. The categories of the “sample analyzed” variable were:  
53  
54  
55  
56  
57  
58  
59  
60

- 1  
2  
3 (1) Full random sample - analyses involved the total randomized N's (with or without  
4 imputation of missing data)  
5  
6
- 7  
8 (2) Full random sample (likely) - analyses appeared to use the full randomized sample,  
9 but N's were not reported  
10
- 11  
12 (3) Random sample followed-up - attempted to follow-up all randomized participants  
13 regardless of amount of medication/treatment completed and conducted analyses on this  
14 sample  
15  
16
- 17  
18 (4) Sufficient dose - analyses were conducted for only those participants who completed  
19 a specified amount of treatment or who received at least a minimum dose of treatment  
20  
21
- 22  
23 (5) Completer sample - analyses conducted for only those patients who completed the  
24 medication/treatment phase  
25  
26
- 27  
28 (6) False inclusion - after randomization, participants were found to not meet inclusion  
29 criteria and were subsequently removed from the analyses  
30  
31
- 32  
33 (7) Other - reported N's or degrees of freedom that were less than what would be  
34 expected for the randomized N, but no explanation of the participants included or  
35 excluded from the analysis was provided  
36  
37
- 38  
39 (8) Unclear – insufficient information was provided to determine the sample analyzed.  
40  
41

42  
43 Only analyses conducted on the Full Random Sample or Full Random Sample (likely) categories  
44 were deemed to be “true” ITT analyses, whereas the others were considered something other  
45 than ITT analyses.  
46  
47  
48

49  
50 The categories for the “missing data strategy” variable were as follows:  
51

- 52  
53 (1) No dropout – no dropout from treatment and 100% reassessed  
54  
55  
56  
57  
58  
59  
60



- (2) All followed - there were drop-outs from treatment, but all participants, including treatment dropouts, were reassessed
- (3) Statistical imputation or interpolation - used a statistical analysis that imputed or interpolated missing data, e.g., mixed-model interpolation
- (4) Failure assumed for missing data (missing = failure) - assumed that missing data reflected poor outcome, e.g., relapse
- (5) Baseline assigned - a participant's baseline score was assigned if outcome data were missing
- (6) LOCF - used the imputation strategy of Last Observation Carried Forward
- (7) Censored – last assessment point was used in survival analyses
- (8) Mean - used the mean of the sample followed for missing data
- (9) Other – used some other imputation of missing data strategy
- (10) Sample followed - conducted analyses with data for the sample of participants that the researchers were able to follow/reassess
- (11) Unclear - no or unclear information provided.

### Statistical Analyses

Descriptive statistics were generated for data analytic strategies and missing data strategies used in the 165 RCTs of pharmacotherapies for AUD and alcohol misuse. Generalized linear model analyses were conducted to determine changes in both data analytic and missing data strategy over time. In those analyses, the response variables, data analytic strategy and missing data strategy, were coded as binary (0='No', 1='Yes'), with year of publication as predictor of a 'Yes' response.

### Results

1  
2  
3 As noted in Table 1, a substantial discrepancy was evident between reporting an ITT  
4 strategy versus actually conducting a “true” ITT analysis (i.e., reporting an ITT strategy when  
5 something other than ITT was conducted). Of the 165 studies included in this review, 74  
6 reported using an ITT strategy. However, less than half of those studies conducted a true ITT  
7 analysis ( $K=29$ ; 39%) according to information in study reports. Interestingly, 35% ( $K=32$ ) of the  
8 91 studies whose reports made *no* claim of using an ITT strategy, in fact, *did* perform true ITT  
9 analyses.  
10  
11  
12  
13  
14  
15  
16  
17  
18  
19  
20  
21  
22  
23  
24  
25  
26  
27  
28  
29  
30  
31  
32  
33  
34  
35  
36  
37  
38  
39  
40  
41  
42  
43  
44  
45  
46  
47  
48  
49  
50  
51  
52  
53  
54  
55  
56  
57  
58  
59  
60

1  
2  
3  
4  
5  
6  
7  
8  
9  
10  
11  
12  
13  
14  
15  
16  
17  
18  
19  
20  
21  
22  
23  
24  
25  
26  
27  
28  
29  
30  
31  
32  
33  
34  
35  
36  
37  
38  
39  
40  
41  
42  
43  
44  
45  
46  
47  
48  
49

Table 1.

| Reported Using ITT   | Conducted True ITT <sup>a</sup> | Sample Analyzed    |                             |                  |                 |                  |                 |        |          | Total Number of ITT and/or Non-ITT Approaches Used |
|----------------------|---------------------------------|--------------------|-----------------------------|------------------|-----------------|------------------|-----------------|--------|----------|----------------------------------------------------|
|                      |                                 | Full Random Sample | Full Random Sample (likely) | Random Sample FU | Sufficient Dose | Completer Sample | False Inclusion | Other  | Unclear  |                                                    |
| <b>No (K=91)</b>     | 32 (35%)                        | 28 (25%)           | 4 (4%)                      | 6 (5%)           | 19 (17%)        | 31 (28%)         | 2 (2%)          | 4 (4%) | 16 (14%) | 112                                                |
| <b>Yes (K=74)</b>    | 29 (39%)                        | 21 (21%)           | 9 (9%)                      | 7 (7%)           | 40 (39%)        | 7 (7%)           | 8 (8%)          | 2 (2%) | 0 (0%)   | 102                                                |
| <b>Total (K=165)</b> | 61 (37%)                        | 49 (23%)           | 13 (6%)                     | 13 (6%)          | 59 (28%)        | 38 (18%)         | 10 (5%)         | 6 (3%) | 16 (8%)  | 214                                                |

Note: <sup>a</sup>ITT=Full Random Sample or Full Random Sample (likely) categories; K=study, column description: (1) Full random sample (analyses involved the total randomized N's), (2) Full random sample (likely) (appears to be using the full randomized sample, but N's are not reported with analyses), (3) Random sample followed-up (attempted to follow-up all randomized participants regardless of amount of medication/treatment completed, and conducted analyses on this sample), (4) Sufficient dose (analyses conducted on only those participants who received a minimum amount of medication/treatment), (5) Completer sample (analyses conducted on only those patients who completed the medication/treatment phase), (6) False inclusion (after randomization, participant is found to not meet inclusion criteria and is subsequently removed from the analyses), (7) Other (analyses report N's or degrees of freedom that are less than what would be expected for the randomized N, but no explanation on the participants included or excluded from the analysis is provided), and (8) Unclear (insufficient information to determine the sample analyzed). Only categories (1) Full random sample and (2) Full random sample (likely) are considered a "true" ITT strategy, whereas the others are considered something other than ITT.

1  
2  
3  
4  
5  
6 Regarding the specific data analytic strategy used, the values in each row of Table 1 do  
7  
8 not sum to the total number of studies in the first column (i.e., "Reported Using ITT") due to 45  
9  
10 studies utilizing both ITT and non-ITT analyses (e.g., conducted an ITT analysis assuming  
11  
12 failure for dichotomous outcomes AND also used a complete cases approach for continuous  
13  
14 outcomes). In such instances, we coded "Reported Using ITT" as "Yes" if the study mentioned  
15  
16 using an ITT strategy and coded it as "No" otherwise (i.e., no mention of using an ITT strategy).  
17  
18  
19

20 The most common approach utilized in studies reporting the use of an ITT strategy, other  
21  
22 than use of a true ITT ( $K=29$ ; 39%), involved analyses of data for participants who completed a  
23  
24 "sufficient dose" of the medication/treatment ( $K=40$ ; 39%). All other strategies were utilized  
25  
26 <10% of the time. The most common analytic method used in studies not mentioning an ITT  
27  
28 strategy was actually a true ITT analysis ( $K=32$ ; 29%), followed by analyses of data from  
29  
30 completer samples ( $K=31$ ; 28%), analyses for participants who completed a "sufficient dose" of  
31  
32 medication/treatment ( $K=19$ ; 17%), and indeterminable strategies (i.e., Unclear;  $K=16$ ; 14%).  
33  
34  
35

36 Table 2 reports the descriptive information on the missing data strategies employed in the  
37  
38 studies using and not using a true ITT approach. Similar to Table 1, the values in each row of  
39  
40 Table 2 do not sum to the total number of studies in the first column (i.e., "Conducted ITT") due  
41  
42 to 42 studies utilizing multiple missing data strategies. The most common missing data strategy  
43  
44 utilized in studies employing an ITT approach was either unclear ( $K=24$ ; 23%) or involved  
45  
46 censoring data at the end of FU procedure in survival analyses ( $K=23$ ; 22%). A study could be  
47  
48 categorized as employing an ITT strategy, but having an unclear missing data strategy if, for  
49  
50 example, the study reported the full randomized  $N$ s from analyses, but it was unclear what  
51  
52 particular missing data strategy was utilized. The next most frequently used strategies were  
53  
54  
55  
56  
57  
58  
59  
60

1  
2  
3 assuming missing equals relapse or some other poor outcome (“Failure”;  $K=14$ ; 13%) and using  
4  
5 a statistical imputation or interpolation strategy ( $K=14$ ; 13%), such as a mixed effects model. All  
6  
7  
8 other missing data strategies were utilized  $\leq 10\%$  of the time, except the last observation carried  
9  
10 forward (LOCF) procedure that was used in ( $K=12$ ) 11% of the studies.  
11  
12  
13  
14  
15  
16  
17  
18  
19  
20  
21  
22  
23  
24  
25  
26  
27  
28  
29  
30  
31  
32  
33  
34  
35  
36  
37  
38  
39  
40  
41  
42  
43  
44  
45  
46  
47  
48  
49  
50  
51  
52  
53  
54  
55  
56  
57  
58  
59  
60

For peer review only

Table 2.

| Conducted<br>True ITT    | Missing Data Strategy     |                                |                                   |                         |                      |             |                                                 |                     |           |              |             | Total<br>Number of<br>ITT and/or<br>Non-ITT<br>Approaches<br>Used |
|--------------------------|---------------------------|--------------------------------|-----------------------------------|-------------------------|----------------------|-------------|-------------------------------------------------|---------------------|-----------|--------------|-------------|-------------------------------------------------------------------|
|                          | No Tx<br>or FU<br>Dropout | All FU<br>(some tx<br>dropout) | Imputation<br>or<br>Interpolation | Missing<br>=<br>Failure | Baseline<br>Assigned | LOCF        | Censored<br>(end of FU)<br>Survival<br>Analysis | Mean<br>Substituted | Other     | Sample<br>FU | Unclear     |                                                                   |
| <b>No<br/>(K=104)</b>    | 0                         | 0                              | 6<br>(4%)                         | 23<br>(17%)             | 1<br>(1%)            | 22<br>(16%) | 25<br>(18%)                                     | 3<br>(2%)           | 2<br>(1%) | 38<br>(27%)  | 17<br>(12%) | 139                                                               |
| <b>Yes<br/>(K=61)</b>    | 1<br>(1%)                 | 2<br>(2%)                      | 14<br>(13%)                       | 14<br>(13%)             | 1<br>(1%)            | 12<br>(11%) | 23<br>(22%)                                     | 2<br>(2%)           | 1<br>(1%) | 11<br>(10%)  | 24<br>(23%) | 105                                                               |
| <b>Total<br/>(K=165)</b> | 1<br>(>1%)                | 2<br>(>1%)                     | 20<br>(07%)                       | 37<br>(16%)             | 2<br>(>1%)           | 34<br>(13%) | 48<br>(19%)                                     | 5<br>(2%)           | 3<br>(1%) | 49<br>(19%)  | 41<br>(16%) | 259 <sup>a</sup>                                                  |

Note. Column description: (1) No dropout, (2) Followed-up (some dropout) (there were drop-outs from treatment, but all participants, including dropouts were followed-up), (3) Interpolated (used a statistical analysis that interpolated missing data, e.g., mixed-model interpolation), (4) Failure (assumed that missing data = failure, e.g., relapse), (5) Baseline assigned (assigned a person's baseline score if the outcome score was missing), (6) LOCF (used an imputation strategy of Last Observation Carried Forward), (7) Censored (end of FU) (data presented in a survival analysis), (8) Mean (used the mean for each person across available assessments/timepoints), (9) Other (other imputation strategy), (10) Sample FU (conducted analyses on the sample of participants that the researchers was able to follow-up), (11) Unclear (no information provided/unclear).

1  
2  
3  
4  
5  
6 The most common missing data method utilized in studies not conducting a true ITT  
7  
8 analysis was analyzing the sample followed-up ( $K=38$ ; 27%), followed by censoring at the end  
9  
10 of FU procedure ( $K=25$ ; 18%), assuming failure (“Failure”;  $K=23$ ; 17%), last observation carried  
11  
12 forward ( $K=23$ ; 16%) and an unclear strategy ( $K=17$ ; 12%). All other missing data strategies  
13  
14 were used  $\leq 10\%$  of the time. A study could be categorized as *not* employing an ITT strategy, but  
15  
16 still using a missing data strategy of assuming failure or last observation carried forward if, for  
17  
18 example, the study assumed failure for missing participants, but something less than the full  
19  
20 randomized  $N$ s were reported for analyses. Tables 3 and 4 display changes in ITT analyses and  
21  
22 missing data strategies over time. No statistically significant change (although marginally  
23  
24 significant trend) was found in use of true ITT analyses over time (Table 3). This relationship is  
25  
26 depicted graphically with time on the  $x$ -axis, probability (of being an ITT) from generalized  
27  
28 linear model results on the  $y$ -axis, and raw study values (0= not ITT, 1=ITT) displayed as points.  
29  
30 The 95% confidence intervals are displayed as a grey line around the probability slope.  
31  
32  
33  
34  
35

36  
37 Several statistically significant relationships between missing data strategy and time  
38  
39 emerged, as displayed in Table 4. Specifically, censored at end of FU (for survival analyses), last  
40  
41 observation carried forward (LOCF), and using a statistical analysis to impute/interpolate  
42  
43 missing data (Imputed/Interpolated, e.g., mixed-model interpolation) have become more  
44  
45 common over time, whereas analyses conducted on only the samples of participants that the  
46  
47 researchers were able to follow-up (Sample FU) has become less common. To explore whether  
48  
49 increasing use of certain missing data strategies over time was confounded with longitudinal  
50  
51 methods being increasingly employed, a proxy dummy control variable (0=only end-of treatment  
52  
53  
54  
55  
56  
57  
58  
59  
60

1  
2  
3 assessment, 1= posttreatment and follow-up assessment(s)) was added to the analyses; the results  
4  
5 were virtually unchanged.  
6  
7  
8  
9  
10  
11  
12  
13  
14  
15  
16  
17  
18  
19  
20  
21  
22  
23  
24  
25  
26  
27  
28  
29  
30  
31  
32  
33  
34  
35  
36  
37  
38  
39  
40  
41  
42  
43  
44  
45  
46  
47  
48  
49  
50  
51  
52  
53  
54  
55  
56  
57  
58  
59  
60

For peer review only



Table 3. Change in true ITT analyses over time

|             | Estimate | SE   | t-value | P     |
|-------------|----------|------|---------|-------|
| (Intercept) | -1.52    | 0.64 | -2.39   | 0.02* |
| Year        | 0.04     | 0.02 | 1.85    | 0.06  |

Note: generalized linear model with binary outcome (ITT analyses conducted=1 or not=0). \*=p-value <.05  
k=165

Table 4. Change in missing data strategy over time

|                       | Estimate | SE   | z-value | P       |
|-----------------------|----------|------|---------|---------|
| Fail                  | 0.03     | 0.02 | 1.38    | 0.16    |
| All FU                | -0.10    | 0.09 | -1.18   | 0.24    |
| All FU (some dropout) | -0.09    | 0.06 | -1.43   | 0.15    |
| Baseline Assigned     | 0.47     | 0.36 | 1.31    | 0.19    |
| Censored (end of FU)  | 0.09     | 0.03 | 3.19    | <0.01*  |
| LOCF                  | 0.06     | 0.03 | 2.01    | 0.045*  |
| Grp Avg               | 0.07     | 0.12 | 0.62    | 0.54    |
| Mean FU points        | 0.07     | 0.07 | 0.92    | 0.36    |
| Other                 | 0.05     | 0.09 | 0.55    | 0.59    |
| Sample FU             | -0.10    | 0.02 | -4.40   | <0.001* |
| Interpolation         | 0.33     | 0.09 | 3.83    | <0.001* |
| Unclear               | 0.02     | 0.02 | 0.94    | 0.35    |

Note: generalized linear model with binary outcome.  
\*=p-value <.05

## Discussion

Across the 165 pharmacotherapy trials included in this analysis, less than half of the 74 studies reporting to have used an ITT strategy actually did so. This finding likely is due, at least in part, to a lack of a consensual definition of what constitutes an ITT analysis. In fact, the most common procedure for studies reporting, but not actually using an ITT, involved analyses on participants who completed a sufficient dose of treatment. That is, analyses were conducted on data for only those participants who completed a certain amount of treatment or who received a minimum intervention. This type of analysis is generally considered a "per protocol" approach, which contrasts to an ITT approach which includes outcome data for all participants, regardless of adherence to treatment [2].

Among the studies conducting a true ITT strategy, it was unclear what missing data strategy was used in nearly 25% of these studies. Lack of clarity in journal articles about how missing data were handled makes it difficult for readers to critically assess the study findings. A per protocol analysis answers questions of an explanatory nature, e.g., "how efficacious is this treatment for those adherent to the treatment?" In contrast, an ITT analysis provides more realistic (and usually less biased) estimates of the average treatment effects in the "real-world," as it accounts for both patient dropout and non-adherence to treatment. If findings from a per protocol analysis are incorrectly perceived as coming from an ITT analysis, treatment effects under more routine conditions of care will be overestimated. Journal editors and peer reviewers should be attentive to these issues and request that authors provide a clear description of the sample analyzed (i.e., ITT, modified ITT, per protocol) in their studies, along with details regarding how missing data were handled.

1  
2  
3 Because missing data strategies are becoming more sophisticated and are being facilitated  
4 by computer technology that is easily able to process data using complex algorithms, the  
5 diversity of missing data strategies that are employed is increasing. Indeed, our findings indicate  
6 that more complex imputation procedures are becoming more prevalent over time. One such  
7 imputation procedure is Multiple Imputation, [3] which involves a Bayesian estimation  
8 procedure to average outcomes across multiple imputed datasets. Missing data are then replaced  
9 with a probable value based on other available variables in the data. Presumably, the results with  
10 this approach more closely approximate the results of an ITT analysis with 100% follow-up than  
11 any other method of handling missing data that is currently available.  
12  
13  
14  
15  
16  
17  
18  
19  
20  
21  
22  
23

## 24 **Conclusion**

25  
26  
27 Discrepancies in reporting versus actually conducting true ITT analyses were apparent in  
28 this body of alcohol pharmacotherapy trials. Lack of clarity regarding the missing data strategy  
29 used also was common. The degree to which these problems are present in reports of trials of  
30 pharmacotherapies and psychosocial interventions for other conditions remains to be determined.  
31  
32 In addition, consensus on a standard definition of ITT is needed, as are clearer reporting  
33 standards for analyses and the handling of missing data in reports of clinical trials.  
34  
35  
36  
37  
38  
39  
40  
41  
42  
43  
44  
45  
46  
47  
48  
49  
50  
51  
52  
53  
54  
55  
56  
57  
58  
59  
60

## Acknowledgments

Preparation of this manuscript was supported by U.S. National Institute on Alcohol Abuse and Alcoholism Grant No. AA008689 and the U.S. Department of Veterans Affairs, Office of Research and Development, Health Services Research and Development Service and Substance Use Disorder Quality Enhancement Research Initiative. The views expressed are those of the authors and do not necessarily represent the views of the National Institute on Alcohol Abuse and Alcoholism, the Department of Veterans Affairs, or any other U.S. Government entity.

1  
2  
3  
4  
5  
6  
7  
8  
9  
10  
11  
12  
13  
14  
15  
16  
17  
18  
19  
20  
21  
22  
23  
24  
25  
26  
27  
28  
29  
30  
31  
32  
33  
34  
35  
36  
37  
38  
39  
40  
41  
42  
43  
44  
45  
46  
47  
48  
49  
50  
51  
52  
53  
54  
55  
56  
57  
58  
59  
60

**Ethics**

No ethics approval was required for completion of this study. It aggregated previously published journal articles.

For peer review only

**ICMJE uniform disclosure**

All authors have completed the ICMJE uniform disclosure form at [www.icmje.org/coi\\_disclosure.pdf](http://www.icmje.org/coi_disclosure.pdf) and declare: no support from any organization for the submitted work; no financial relationships with any organizations that might have an interest in the submitted work in the previous three years; no other relationships or activities that could appear to have influenced the submitted work.

### Contributorship Information

A. C. Del Re was involved in the study's design, analysis and interpretation of data, drafting the article and revising it. Natalya C. Maisel was involved in the study's design and revising the article. Janet Blodgett was involved in the study's design. John W. Finney was involved in the study's conception and design, interpretation of data, and revising it critically for important intellectual content. All authors gave final approval of the version to be published.

### Copyright/license for publication

The Corresponding Author has the right to grant on behalf of all authors and does grant on behalf of all authors, a worldwide license to the Publishers and its licensees in perpetuity, in all forms, formats and media (whether known now or created in the future), to i) publish, reproduce, distribute, display and store the Contribution, ii) translate the Contribution into other languages, create adaptations, reprints, include within collections and create summaries, extracts and/or, abstracts of the Contribution, iii) create any other derivative work(s) based on the Contribution, iv) to exploit all subsidiary rights in the Contribution, v) the inclusion of electronic links from the Contribution to third party material where-ever it may be located; and, vi) license any third party to do any or all of the above.



- 1 Gupta SK. Intention-to-treat concept: A review. *Perspect Clin Res* 2011;**2**:109–12. doi:10.4103/2229-3485.83221
- 2 Hollis S, Campbell F. What is meant by intention to treat analysis? Survey of published randomised controlled trials. *Bmj* 1999;**319**:670–4.
- 3 Little RJ, Rubin DB. *Statistical analysis with missing data*. Wiley New York 1987.
- 4 Ruiz-Canela M, Martínez-González MA, de Irala-Estévez J. Intention to treat analysis is related to methodological quality. *BMJ* 2000;**320**:1007.
- 5 Moher D, Schulz K, Altman D. The CONSORT statement: revised recommendations for improving the quality of reports of parallel group randomized trials. *BMC Med Res Methodol* 2001;**1**:2.
- 6 Schulz KF, Altman DG, Moher D. CONSORT 2010 statement: updated guidelines for reporting parallel group randomised trials. *Int J Surg* Published Online First: 2011. <http://www.sciencedirect.com/science/article/pii/S1743919111005620> (accessed 6 Mar2013).
- 7 Zwarenstein M, Treweek S, Gagnier JJ, *et al*. Improving the reporting of pragmatic trials: an extension of the CONSORT statement. *BMJ* Published Online First: 2008. <http://www.ncbi.nlm.nih.gov/pmc/articles/PMC3266844/> (accessed 6 Mar2013).
- 8 Polit DF, Gillespie BM. Intention-to-treat in randomized controlled trials: recommendations for a total trial strategy. *Res Nurs Health* 2010;**33**:355–68.
- 9 Schulz KF, Grimes DA. Sample size slippages in randomised trials: exclusions and the lost and wayward. *The Lancet* 2002;**359**:781–5.
- 10 Avins AL, Pressman A, Ackerson L, *et al*. Placebo Adherence and Its Association with Morbidity and Mortality in the Studies of Left Ventricular Dysfunction. *J Gen Intern Med* 2010;**25**:1275–81. doi:10.1007/s11606-010-1477-8
- 11 Granger AL, Fehnel SE, Hogue SL, *et al*. An assessment of patient preference and adherence to treatment with Wellbutrin SR: A web-based survey. *J Affect Disord* 2006;**90**:217–21. doi:10.1016/j.jad.2005.08.018
- 12 Schwartz D, Lellouch J. Explanatory and pragmatic attitudes in therapeutical trials. *J Clin Epidemiol* 2009;**62**:499–505.
- 13 Maisel NC, Blodgett JC, Wilbourne PL, *et al*. Meta-analysis of naltrexone and acamprosate for treating alcohol use disorders: when are these medications most helpful? *Addiction* 2013;**108**:275–93. doi:10.1111/j.1360-0443.2012.04054.x

## BMJ

### Licence to BMJ Publishing Group Limited (“BMJ Group”) for Publication

To be agreed to by the corresponding author or guarantor on behalf of all authors (“Corresponding Author”). All authors collectively are referred to as the “Contributors”

In consideration of the BMJ Group (“the Publishers”) considering to publish the article contained within the original manuscript which includes without limitation any diagrams, photographs, other illustrative material, video, film or any other material howsoever submitted by the Contributor(s) at any time and related to the Contribution (“the Contribution”) in the BMJ (“the Journal”), certain rights are required to be granted by each different category of author(s), which are as follows:

1. For employees of the **UK Crown acting in the course of their employment**- a non exclusive Licence, as set out below. All provisions of this document apply. The non exclusivity relates to the original submitted manuscript video, films, images, photographs, diagrams and/or illustrative material only.
2. For employees of the **US Federal Government employees acting in the course of their employment**, no copyright exists and the Contribution is in the public domain so no licence is required to be granted. The Author Warranties below apply (excluding 1.iii).
3. For all other authors, an exclusive Licence, as set out below. All provisions of this document apply.

**NB** where a Contribution is a multi authored work, each author’s element of the Contribution will be dealt with in accordance with 1, 2 or 3 above, as applicable.

#### The Licence

The Licence granted in accordance with 1 or 3 above is:

A worldwide, licence, to the Publishers and its licensees in perpetuity (subject to the Reversion of Rights set out below), in all forms, formats and media (whether known now or created in the future), **to** i) publish, reproduce, distribute, display and store the Contribution, ii) translate the Contribution into other languages, create adaptations, reprints, include within collections and create summaries, extracts and/or, abstracts of the Contribution and convert or allow conversion into any format including without limitation audio, iii) create any other derivative work(s) based in whole or part on the Contribution, iv) to exploit all subsidiary rights that currently exist or as may exist in the future in the Contribution, v) the inclusion of electronic links from the Contribution to third party material where-ever it may be located; and, vi) licence any third party to do any or all of the above.

If you and/or any co-author’s employer owns the copyright to your contribution you must obtain in writing the relevant employers’ consent to grant the licence and agree to all obligations herein. The author(s) hereby agree that in the event that the BMJ Group sell, the whole or part of its journal business to any third party, the benefit and the burden of the Licence contained herein shall be assigned to that third party.

#### Additional Rights and Obligations

The author(s) (and their employers as applicable), hereby authorise the Publishers to take such steps as they consider necessary at their own expense in the copyright owners name and on their behalf, if they believe that a third party is infringing or is likely to infringe copyright or the rights granted to the Publishers herein in the Contribution without further recourse to the copyright owner(s).

For Original Research articles and Open Access Funded Articles (as both defined below), the Publishers expressly agree to place the published Contribution for display on PubMed Central (including its international mirror sites) promptly without charge to the authors or their employers (provided Pubmed Central does not charge the Publishers), which will include any Publishers’ supplied amendments or retractions.

1  
2  
3  
4  
5  
6  
7  
8  
9  
10  
11  
12  
13  
14  
15  
16  
17  
18  
19  
20  
21  
22  
23  
24  
25  
26  
27  
28  
29  
30  
31  
32  
33  
34  
35  
36  
37  
38  
39  
40  
41  
42  
43  
44  
45  
46  
47  
48  
49  
50  
51  
52  
53  
54  
55  
56  
57  
58  
59  
60

“**Original Research**” means an article reporting a research study, with a research structured abstract and normally appearing in the Research section of the BMJ. “**Open Access Funded Articles**” means articles funded in whole or part by a research grant from a government and/or charitable organisation(s) that requires open access deposit in PubMed Central. Such articles are identified by the reference to a Creative Commons licence.

The author(s) acknowledge and accept that BMJ Group may make additional changes to the contribution as considered necessary in accordance with standard editorial processes whether before or after publication. The Corresponding Author will usually see proofs for their Contributions and every effort will be made to consult with the Corresponding Author if substantial alterations are made. The BMJ Group may also retract or publish a correction or other notice when it considers this appropriate for legal or editorial reasons and this shall be at its absolute discretion which shall be exercised reasonably.

#### Reversion of Rights

If the Contribution is not published in either the print or electronic versions of the Journal or any other Publisher(s) products, within 12 months of final acceptance by the BMJ Group, (or as otherwise agreed), any Licence granted herein shall automatically terminate and all rights shall revert to the copyright owner. The Publishers may keep a copy of the Contribution as a record (including via any contractor).

#### Rights Granted to Owners of the Contribution

Ownership of copyright remains with the author(s) or their employers. All rights not expressly granted are, subject to the Licence terms, reserved by the Publishers. In return for the grant of the Licence herein, the copyright owner(s) shall have the following rights for **non-Commercial Use (unless otherwise stated)** of the Contribution:

1. The right to reproduce a reasonable number (no more than 100) print copies of the final Contribution, by copying or downloading from the BMJ Group website, for personal use and to send copies to colleagues in print or electronic form provided no fee is charged and this is not done on a systematic basis (which includes via mass e-mailings).

2. The right to include the Contribution in a compilation for classroom use (course packs) to be distributed free of charge (other than for direct photocopying cost) to students at the Contributor(s)'s institution or to be stored in digital format in data rooms for access by students as part of their course work and for in house training programmes of the Contributor(s)'s employer or at seminars or conferences subject to a limit of 100 copies per conference or seminar.

3. For all articles (excluding articles commissioned by the Publishers), the right to post a version of the final published version of the Contribution, or any abstract of the final published Contribution on the Contributor(s)'s own and/or his/her institution's website after the Publisher's publication.

4. For all Publisher commissioned articles, the right to post a version of the final published version of the Contribution, or any abstract of the final published Contribution on the Contributor(s)'s own and/or his/her institution's website 12 months after publication.

5. The following statement must accompany the articles posted on the Contributor(s)'s and/or his/her institution's website:

“This article has been published in the BMJ [insert full citation reference] and can also be viewed on the journal's website at [www.bmj.com](http://www.bmj.com)”

6. In addition, for Original Research articles and Open Access Funded Articles copyright owners (and the Publishers) may and may allow third parties to use the Contribution in accordance one of the following Creative Commons licences depending on the source of the research funding as per below:

a) where the Original Research article and/or Open Access Funded Articles **is not** funded by the Wellcome Trust or UK Research Council, the articles may be re-used under the terms of the Creative Commons Attribution-Non Commercial 3.0 Unported (CC BY-NC 3.0) see:

<http://creativecommons.org/licenses/by-nc/3.0/>

1  
2  
3 and

4 <http://creativecommons.org/licenses/by-nc/3.0/legalcode>

5 or any updated versions as determined by the Publisher from time to time.

6  
7 or

8 b) where the Original Research article and/or Open Access Funded Articles is funded by the Wellcome  
9 Trust or UK Research Council, the Contribution may be re-used under the terms of the Creative  
10 Commons Attribution 3.0 Unported Licence (CC BY 3.0) see:

11 <http://creativecommons.org/licenses/by/3.0/>

12 and

13 <http://creativecommons.org/licenses/by/3.0/legalcode>

14 or any updated versions as determined by the Publisher from time to time

15  
16 subject to ensuring the Publishers and the Journal are referenced (including a full citation) as set out  
17 above; all third party rights within all images, diagrams, photograph, other illustrative material or  
18 films, not owned by the authors or BMJ Group are cleared independently and appropriately; and all the  
19 Publishers trademarks are removed from any derivative works and ensuring any translations, for which  
20 a prior translation agreement with BMJ Group has not been established, must prominently display the  
21 statement: “This is an unofficial translation of an article that appeared in a BMJ Group publication.  
22 BMJ Group has not endorsed this translation”.

23  
24  
25 7. The right to publish with the necessary acknowledgement of the Publishers and the Journal, all or  
26 part of the material from the published Contribution in a book, essay, position paper, or other non peer  
27 reviewed publication authored or edited by the Contributor(s)’s (which may be a Commercial Use).  
28 This does not apply to multiple Contributions in the same journal, for which permission from the  
29 Publishers must be sought.

30  
31 8. The right to use selected figures and tables and (of which the author or his employer owns or has  
32 licensed) and selected text (up to 300 words) from the Contribution for incorporation within another  
33 work published in print or digital format by a third party, so long as full credit is given to the Publishers  
34 and use of the parts of the Contribution is non Commercial Use.

35  
36 9. Subject to it not being contrary to English law to do so (such as for example where the UK has  
37 trading or other bans with the country of the Corresponding Authors origin or certain groups of people  
38 within), the right to receive a royalty for up to 5 years from publication of 10% of any net receipts less  
39 sales commission on single orders in excess of £2000 received by the Publisher for any single  
40 Contribution reprint or translation sales to a single third party, subject however to any fee being  
41 determined (if charged) at the absolute discretion of the Publishers as may be altered from time to time.  
42 If the Publishers receive such an order for reprint sales of the Contribution, they will contact the  
43 Corresponding Author at the address given on the published Contribution to find out to whom payment  
44 should be made. Corresponding Authors have the responsibility to ensure that all authors have agreed  
45 what should be done with any such royalty payment and to keep the Publisher updated with current  
46 contact details.

47 For permission to use materials that are beyond permitted here, visit [http://www.bmj.com/about-](http://www.bmj.com/about-bmj/resources-readers/permissions)  
48 [bmj/resources-readers/permissions](http://www.bmj.com/about-bmj/resources-readers/permissions)

49 “Commercial Use” includes:

- 50 - copying or downloading of documents, or linking to such postings, for further  
51 redistribution, sale or licensing, for a fee;
- 52 - copying, downloading or posting by a site or service that incorporates advertising  
53 with such content;
- 54 - the inclusion or incorporation of document content in other works or services (other  
55 than for legally permitted quotations with an appropriate citation) that is then  
56 available for sale or licensing, for a fee.
- 57 - use of documents or document content (other than for legally permitted quotations  
58 with appropriate citations) by organisations for any promotional or advertising  
59

purposes whether direct or indirect, whether for a fee or otherwise. Distribution by or on behalf of pharmaceutical organisations is considered in all cases as Commercial Use;

- use for the purposes of monetary reward by means of sale, resale, license, loan, hire transfer or other form of commercial exploitation.

#### Author warranties

1. The author(s) warrant that: i) they are the sole author(s) of the Contribution which is an original work; ii) the whole or a substantial part of the Contribution has not previously been published; iii) they or their employers are the copyright owners of the Contribution; iv) to the best of their knowledge that the Contribution does not contain anything which is libellous, illegal or infringes any third party's copyright or other rights; v) that they have obtained all necessary written consents for any patient information which is supplied with the Contribution and vi) that they have declared or will accurately declare all competing interests to the Publisher.

#### Anti Bribery

As a service provider to the BMJ Group, you agree that you shall: (a) comply with all applicable laws, statutes, regulations and codes relating to anti-bribery and anti-corruption including but not limited to the Bribery Act 2010 (Relevant Requirements); b) not engage in any activity, practice or conduct which would constitute an offence under sections 1, 2 or 6 of the Bribery Act 2010 (as amended) if such activity, practice or conduct had been carried out in the UK; (c) comply with any Publisher Ethics and Anti-bribery Policy supplied to you from time to time including as contained as follows (Relevant Policies):

<http://group.bmj.com/group/about/corporate/Anti-Bribery%20and%20Corruption%20Policy%20August%202012.pdf>;

(d) promptly report to the Chief Executive Officer or Chairman of the Publisher any request or demand for any undue financial or other advantage of any kind received by you in connection with the performance of this Agreement; Breach of this Clause shall be deemed a material breach of this Agreement.

#### Law and Jurisdiction

To the fullest extent permitted by law, this Agreement will be governed by the laws of England and shall be governed and construed in accordance with the laws of England whose courts shall have exclusive jurisdiction, unless as at the date of formation of this Agreement either i) an English judgement could not be enforced in the Corresponding Author's stated country location; or ii) it would take six months or more for the BMJ Group to enforce an English judgement in the Corresponding Author's stated country location, then it is hereby agreed that this Agreement shall be governed by the laws of the Corresponding Author's stated country (or state if applicable) and their courts shall have jurisdiction. Notwithstanding any of the above, this clause is governed by the laws of England.

#### The following statement must be included in your manuscript, together with the relevant tick box line below:

"I [*insert full name*] The Corresponding Author of this article contained within the original manuscript which includes any diagrams & photographs within and any related or stand alone film submitted (the Contribution") has the right to grant on behalf of all authors and does grant on behalf of all authors, a licence to the BMJ Publishing Group Ltd and its licencees, to permit this Contribution (if accepted) to be published in the BMJ and any other BMJ Group products and to exploit all subsidiary rights, as set out in our licence set out at: <http://www.bmj.com/about-bmj/resources-authors/forms-policies-and-checklists/copyright-open-access-and-permission-reuse>."

*IF YOU ARE A NATIONAL INSTITUTE OF HEALTH ("NIH") EMPLOYEE, CONTRACTOR OR TRAINEE* the following cover sheet will be accepted by the BMJ Group and NIH and incorporated into the above Licence.

Please tick **one or more** boxes as appropriate:

- I am the sole author of the Contribution.
- I am one author signing on behalf of all co-owners of the Contribution.
- The Contribution has been made in the course of my employment and I am signing as authorised by my employer.

- 1  
2  
3 x I am a US Federal Government employee acting in the course of my employment.  
4  I am not a US Federal Government employee, but some or all of my co-authors are.  
5  I am an employee of the UK Crown\* acting in the course of my employment  
6  I am a US Federal Government employee acting in the course of my employment.  
7  I am not a US Federal Government employee, but some or all of my co-authors are.  
8  I am an employee of the UK Crown acting in the course of my employment  
9  I am not an employee of the UK Crown acting in the course of my employment but  
10 some/all of my co-authors are.\*

11 \*Such authors should consult guidance and if necessary return any completed form.  
12  
13  
14  
15  
16  
17  
18  
19  
20  
21  
22  
23  
24  
25  
26  
27  
28  
29  
30  
31  
32  
33  
34  
35  
36  
37  
38  
39  
40  
41  
42  
43  
44  
45  
46  
47  
48  
49  
50  
51  
52  
53  
54  
55  
56  
57  
58  
59  
60

## Article summary

### Intention-to-Treat Analyses and Missing Data Approaches in Pharmacotherapy Trials for Alcohol Use Disorders

A. C. Del Re, Natalya C. Maisel, Janet Blodgett, John W. Finney

#### 1) Article Focus

Using the reports of a large pool of randomized controlled trials, we examined:

- Linkage between analytic strategy (i.e., ITT or not)
- How missing data on outcomes were handled (if at all)
- Whether data analytic and missing data strategies have changed over time.

#### 2) Key Messages

- Less than 40% of the studies actually conducted ITT
- The most common method utilized for studies reporting ITT, but not actually using one, involved analyses of data for participants who completed what was deemed a sufficient dose of treatment.
- Whereas no change in the use of ITT analyses over time was found, censored (last follow-up completed) and imputed missing data strategies have increased over time, while analyses of data only for the sample actually followed have decreased over time.

#### 3) Strengths

- Examined a large body of RCT pharmacotherapy trials for alcohol misuse

#### Limitations

- Descriptive analyses could not determine whether there is any relationship between ITT and effect sizes

Intention-to-Treat Analyses and Missing Data Approaches in Pharmacotherapy Trials for  
Alcohol Use Disorders

A. C. Del Re, Natalya C. Maisel, Janet C. Blodgett, John W. Finney

Research Health Science Specialist, ~~Center for Health Care Program Evaluation Resource Center~~,  
VA Palo Alto Health Care System (152MPD), 795 Willow Rd, Menlo Park, CA 94025,  
~~aaron.delre@va.gov aedelre@gmail.com~~, 650-493-5000 x2-25842, Fax: 650- 617-2736, A. C.  
Del Re

Research Health Science Specialist, Center for Health Care Evaluation, VA Palo Alto Health  
Care System (152MPD), 795 Willow Rd, Menlo Park, CA 94025, natalya.maisel@va.gov,  
650-493-5000 ~~x2-(press 2 for Menlo Park, ext. 26966)~~, Natalya C. Maisel

Research Associate, Center for Health Care Evaluation, VA Palo Alto Health Care System  
(152MPD), 795 Willow Rd, Menlo Park, CA 94025, ~~janet.blodgett Janet.Blodgett~~@va.gov, 650-  
493-5000 ~~x2-27292x27292~~, Janet Blodgett

Research Health Science Specialist, Center for Health Care Evaluation, VA Palo Alto Health  
Care System (152MPD), 795 Willow Rd, Menlo Park, CA 94025, john.finney@va.gov, (650)  
493-5000 ~~x2Ext. 2-22848~~, John W. Finney

Correspondence to: A. C. Del Re ~~aaron.delre@va.gov aedelre@gmail.com~~

Keywords: intention to treat, missing data strategies, research methods

Word count: ~~3,5572,780~~, abstract: ~~298326~~, references: 12, figures: ~~10~~, tables: 4

Formatted: Left, Line spacing: Multiple 1.15 li



**Abstract**

**Objectives**~~Objective~~: Intention-to-treat (ITT) is an analytic strategy for reducing potential bias in treatment effects arising from missing data in randomized controlled trials (RCT). Currently, no universally accepted definition of ITT exists, although many researchers consider it to require either no attrition or some imputation procedure to account for missing outcome data in analyses. Using the reports of a large pool of randomized controlled trials, we examined discrepancies between the types of analyses that alcohol pharmacotherapy researchers stated they used versus those they actually used. We also examined the linkage between analytic strategy (i.e., ITT or not) and how missing data on outcomes were handled (if at all), and whether data analytic and missing data strategies have changed over time.

**Design**~~Method~~: Descriptive statistics were generated for reported and actual data analytic strategy and for missing data strategy. ~~for 165 RCTs of pharmacotherapy for alcohol use disorders (AUDs)~~. In addition, generalized linear models determined changes over time in the use of ITT analyses and missing data strategies.

**Setting**: N/A

**Participants**: 165 RCTs of pharmacotherapy for alcohol use disorders.

**Primary and secondary outcome measures**: N/A

**Results**: Of the 165 studies, 74 reported using an ITT strategy. However, ~~based on their reports,~~ less than 40% of the studies actually conducted ITT according to the rigorous definition above.

~~The most common method utilized for studies reporting ITT, but not actually using one, involved analyses of data for participants who completed what was deemed a sufficient dose of treatment.~~

Whereas no change in the use of ITT analyses over time was found, censored (last follow-up completed) and imputed missing data strategies have increased over time, while analyses of data only for the sample actually followed have decreased ~~over time~~.

1  
2  
3  
4  
5  
6  
7  
8  
9 | Conclusions~~Conclusion~~: Discrepancies in reporting versus actually conducting ITT analyses  
10 were found in this body of RCTs. Lack of clarity regarding the missing data strategy used was  
11 common. Consensus on a definition of ITT is important for adequate understanding of research  
12 findings. Clearer reporting standards for analyses and the handling of missing data in  
13  
14  
15  
16  
17  
18  
19  
20  
21  
22  
23  
24  
25  
26  
27  
28  
29  
30  
31  
32  
33  
34  
35  
36  
37  
38  
39  
40  
41  
42  
43  
44  
45  
46  
47  
48  
49  
50  
51  
52  
53  
54  
55  
56  
57  
58  
59  
60

For peer review only

1  
2  
3  
4  
5  
6  
7  
8  
9  
10  
11  
12  
13  
14  
15  
16  
17  
18  
19  
20  
21  
22  
23  
24  
25  
26  
27  
28  
29  
30  
31  
32  
33  
34  
35  
36  
37  
38  
39  
40  
41  
42  
43  
44  
45  
46  
47  
48  
49  
50  
51  
52  
53  
54  
55  
56  
57  
58  
59  
60

In pharmacotherapy trials, participants typically are randomly assigned to a pharmacotherapy or a placebo (control) condition. With a sufficient sample size, randomization usually produces separate groups *without* systematic differences by equalizing factors within groups that may be associated with outcome (e.g., motivation, age, gender). Under ideal circumstances, the randomization process allows valid causal inferences to be made about the impact of the pharmacotherapy compared to the control condition. That is, one can be highly confident that any post-treatment differences in outcome are attributable to the impact of the medication itself and not to pre-existing differences ~~inbetween~~ the characteristics of the pharmacotherapy and placebo samples. However, when the randomization process is disrupted, either through treatment dropout and/or missing data on outcomes, or when the original sample as randomized is not the same sample analyzed (analyzed N < randomized N), bias may be introduced that compromises the internal validity of results. [1–4]

The intention-to-treat (ITT) analytic strategy is one solution for eliminating or reducing bias in treatment effects arising from missing outcome data in randomized controlled trials (RCTs). [1,2] Although no universally accepted definition of ITT currently exists, the procedure nevertheless is endorsed in the Consolidated Standards for Reporting Trials (CONSORT). [5–7] One particularly succinct definition of a "true ITT" [8] analysis is "once randomized, always analyzed." [9] (Schulz and Grimes, 2002, p. 781). Under this definition, ITT involves analysis of *all* trial participants who were randomized, regardless of adherence to treatment protocol (e.g., dropout/withdrawal or protocol deviations). In other words, defined this way, ITT requires either no attrition or some imputation procedure to account for any missing data.

ITT has several strengths, including (1) helping to preserve the integrity of the randomization process (i.e., groups are expected to be similar except for random variation and

Field Code Changed

Formatted: Not Superscript/ Subscript

Formatted: Not Superscript/ Subscript

Formatted: Not Superscript/ Subscript

Field Code Changed

Field Code Changed

Formatted: Not Superscript/ Subscript

Field Code Changed

Formatted: Not Superscript/ Subscript

Field Code Changed

1  
2  
3  
4  
5  
6  
7  
8  
9 receipt of treatment/control condition) and (2) providing a more realistic estimate of average  
10 treatment effects in the "real-world" as it is the norm for some patients to dropout or not adhere  
11 to treatment. <sup>[1]</sup> Both points above address the issue of patient dropout, as analyses on only  
12 adherent patients likely would lead to inflated estimates of treatment effects. Research has shown  
13 that adherent patients generally do better than non-adherent patients, regardless of treatment.  
14 ~~[10,11](Avins et al., 2010; Granger et al., 2006).~~ The more realistic estimates of treatment effects  
15 under conditions of routine care that are derived from ITT analyses have particular relevance for  
16 policy makers and those interested in hypotheses of pragmatic ("real world") importance.  
17  
18  
19  
20  
21  
22  
23

24 A variant of the ITT approach, what Polit and Gillespie (2010) term a "modified ITT"  
25 analysis, maintains the conditions to which people were randomly assigned and attempts to  
26 follow-up all participants, regardless of their participation in the intervention. However, only  
27 those successfully followed are included in the analyses. With this modified approach, however,  
28 the balance in pre-existing characteristics across conditions sought through random assignment is  
29 less likely to hold.  
30  
31  
32  
33  
34

35 An alternative to ITT analysis, the *per protocol* analytic procedure (i.e., analyses based  
36 on only "adherent" participants in randomized samples), has strengths as well and is of particular  
37 importance for hypotheses of an explanatory nature. ~~[12](Schwartz and Lellouch, 1967).~~ The per  
38 protocol approach can range from analyses in which only those research participants who began  
39 treatment are included, to those in which only participants who received what was deemed a  
40 "sufficient dose" of treatment are used, to those in which only participants who fully completed  
41 treatment are included also referred to as a 'complete cases' approach. ~~[also referred to as a~~  
42 'complete cases' approach; <sup>2]</sup>. Advocates of per protocol approach assert that the analysis tests  
43  
44  
45  
46  
47  
48  
49  
50  
51  
52  
53  
54  
55  
56  
57  
58  
59  
60

Formatted: Not Superscript/ Subscript

Field Code Changed

Field Code Changed

Field Code Changed

Formatted: Not Superscript/ Subscript

1  
2  
3  
4  
5  
6  
7  
8  
9  
10  
11  
12  
13  
14  
15  
16  
17  
18  
19  
20  
21  
22  
23  
24  
25  
26  
27  
28  
29  
30  
31  
32  
33  
34  
35  
36  
37  
38  
39  
40  
41  
42  
43  
44  
45  
46  
47  
48  
49  
50  
51  
52  
53  
54  
55  
56  
57  
58  
59  
60

the true efficacy of the intervention when used as directed (i.e., efficacy among those who are adherent and able to tolerate the treatment).

Because both ITT and per protocol approaches to RCT analyses have their strengths, a possible strategy is to conduct an ITT analysis, with a per protocol sensitivity analysis to “bracket” likely effects under different conditions. Nevertheless, ITT analyses are considered the “gold standard” and researchers frequently report the use of this procedure in published literature, even in the absence of a consensual definition. Discrepancies can arise, however, between the type of analyses researchers state in research reports that they conducted and what they *actually* did with respect to use of a “true” ITT analysis or some other procedure based on less than the full randomized sample. For example, in clinical trials in the nursing field, Polit and Gillespie (2009) found that for 10.5% of studies, researchers who stated they had used an ITT approach had actually conducted per protocol analyses.

It is unknown to what degree ITT strategies are being employed in pharmacotherapy for alcohol use disorders. One aim of this review was to determine if there are~~In this review, we examined~~ discrepancies between the types of analyses that researchers stated they used and those they actually used, based on information in reports of a large pool of randomized controlled trials of pharmacotherapy for alcohol use disorders published between 1970 to 2009. A second aim was to describe~~We also examined~~ the use of different missing data strategies in studies in which true and modified ITT analyses were and were not conducted. The final aim was to determine ~~Finally, we examined~~ whether the use of different data analytic approaches and certain types of missing data approaches (e.g., multiple imputation) has increased over time while the use of others has decreased.

## Methods

### Literature Search

1  
2  
3  
4  
5  
6  
7  
8  
9 As part of a larger project examining the efficacy of pharmacotherapies for alcohol use  
10 disorders and alcohol misuse, [i.e., 13]<sup>12</sup>; we identified relevant randomized controlled trials via  
11 several searches of PubMed and PsycINFO conducted at different points over the past decade.  
12  
13 Study inclusion criteria were (a) a focus on treating alcohol misuse or an alcohol use disorder;  
14  
15 (b) participants 18 years of age or older; (c) publication between 1970 and 2009; (d) a report in  
16  
17 the English language; and (e) random assignment of at least five participants each to medication  
18  
19 and placebo groups. [The details of inclusion/exclusion criteria can be found in Maisel et al.\[12\]](#)  
20  
21

22 Searches were intermittent due to sporadic availability of funds and resources. For  
23  
24 example, in one search we used search terms for various medications (e.g., “naltrexone”), terms  
25  
26 for alcohol problems and use disorders and alcohol misuse (e.g., “alcohol\*,” “problem drinking”)  
27  
28 and terms for randomized controlled trials (e.g., “randomized controlled,” “clinical trial”). This  
29  
30 search yielded 1,602 potential research reports. Based on examination of abstracts and [in some](#)  
31  
32 [cases](#), full text versions of these reports, 1,184 were identified as not relevant (e.g., qualitative  
33  
34 studies, reviews). Of the remaining articles, 215 were rejected based on not meeting our  
35  
36 eligibility criteria (e.g., open-label trial), 138 articles met the inclusion criteria, but 65 were  
37  
38 additional publications for studies already in the dataset (e.g., reporting secondary analyses). In  
39  
40 addition to the database searches, we pursued the reference sections from the reports of the  
41  
42 included studies and from previously published reviews of this literature. For the present  
43  
44 analysis, a total of 165 studies met our inclusion criteria

#### 45 **Variables**

46 Descriptive and inferential statistics were generated for two categorical variables: (1) sample  
47  
48 analyzed and (2) missing data strategy. -The categories of the “sample analyzed” variable were:  
49  
50  
51  
52  
53  
54  
55  
56  
57  
58  
59  
60

Field Code Changed

Formatted: Not Superscript/ Subscript

- 1
- 2
- 3
- 4
- 5
- 6
- 7
- 8
- 9 (1) Full random sample - analyses involved the total randomized N's (with or without
- 10 imputation of missing data)
- 11
- 12 (2) Full random sample (likely) - analyses appeared to use the full randomized sample,
- 13 but N's were not reported
- 14
- 15 (3) Random sample followed-up - attempted to follow-up all randomized participants
- 16 regardless of amount of medication/treatment completed and conducted analyses on this
- 17 sample
- 18
- 19 (4) Sufficient dose - analyses were conducted for only those participants who completed
- 20 a specified amount of treatment or who received at least a minimum dose of treatment
- 21
- 22 (5) Completer sample - analyses conducted for only those patients who completed the
- 23 medication/treatment phase
- 24
- 25 (6) False inclusion - after randomization, participants were found to not meet inclusion
- 26 criteria and were subsequently removed from the analyses
- 27
- 28 (7) Other - reported N's or degrees of freedom that were less than what would be
- 29 expected for the randomized N, but no explanation of the participants included or
- 30 excluded from the analysis was provided
- 31
- 32 (8) Unclear – insufficient information was provided to determine the sample analyzed.
- 33
- 34
- 35
- 36
- 37
- 38
- 39
- 40

41 Only analyses conducted on the Full Random Sample or Full Random Sample (likely) categories  
42 were deemed to be “true” ITT analyses, whereas the others were considered something other  
43 than ITT analyses.  
44

45  
46 ~~The~~For those studies in which ITT analyses were actually conducted (i.e., “true” ITT  
47 ~~with no missing outcome data due to 100% reassessment rate or imputing missing data), the~~  
48  
49 categories for the “missing data strategy” variable were as follows:  
50  
51  
52  
53  
54  
55  
56  
57  
58  
59  
60

- (1) No dropout – no dropout from treatment and 100% reassessed
- (2) All followed - there were drop-outs from treatment, but all participants, including treatment dropouts, were reassessed
- (3) Statistical imputation or interpolation - used a statistical analysis that imputed or interpolated missing data, e.g., mixed-model interpolation~~imputation~~
- (4) Failure assumed for missing data (missing = failure) - assumed that missing data reflected poor outcome, e.g., relapse
- (5) Baseline assigned - a participant's baseline score was assigned if outcome data were missing
- (6) LOCF - used the imputation strategy of Last Observation Carried Forward
- (7) Censored – last assessment point was used in survival analyses
- (8) Mean - used the mean of the sample followed for missing data
- (9) Other – used some other imputation of missing data strategy
- (10) Sample followed - conducted analyses with data for the sample of participants that the researchers were able to follow/reassess
- (11) Unclear - no or unclear information provided.

### Statistical Analyses

Descriptive statistics were generated for data analytic strategies and missing data strategies used in the 165 RCTs of pharmacotherapies for AUD and alcohol misuse. Generalized linear model analyses were conducted to determine changes in both data analytic and missing data strategy over time. In those analyses, the response variables, data analytic strategy and missing data strategy, were coded as binary (0='No', 1='Yes'), with year of publication as predictor of a 'Yes' response.



### Results

As noted in Table 1, a substantial discrepancy was evident between reporting an ITT strategy versus actually conducting a “true” ITT analysis (i.e., reporting an ITT strategy when something other than ITT was conducted). Of the 165 studies included in this review, 74 reported using an ITT strategy. However, less than half of those studies conducted a true ITT analysis ( $K=29$ ; 39%) according to information in study reports. Interestingly, 35% ( $K=32$ ) of the 91 studies whose reports made *no* claim of using an ITT strategy, in fact, *did* perform true ITT analyses.

Table 1.

| Reported Using ITT | Conducted True ITT <sup>a</sup> | Sample Analyzed    |                             |                  |                 |                  |                 |       |         | Total Number of ITT and/or Non-ITT Approaches Used |
|--------------------|---------------------------------|--------------------|-----------------------------|------------------|-----------------|------------------|-----------------|-------|---------|----------------------------------------------------|
|                    |                                 | Full Random Sample | Full Random Sample (likely) | Random Sample FU | Sufficient Dose | Completer Sample | False Inclusion | Other | Unclear |                                                    |
| <b>No</b>          | 32                              | 28                 | 4                           | 6                | 19              | 31               | 2               | 4     | 16      | 112                                                |
| <b>(K=91)</b>      | (35%)                           | (25%)              | (4%)                        | (5%)             | (17%)           | (28%)            | (2%)            | (4%)  | (14%)   |                                                    |
| <b>Yes</b>         | 29                              | 21                 | 9                           | 7                | 40              | 7                | 8               | 2     | 0       | 102                                                |
| <b>(K=74)</b>      | (39%)                           | (21%)              | (9%)                        | (7%)             | (39%)           | (7%)             | (8%)            | (2%)  | (0%)    |                                                    |
| <b>Total</b>       | 61                              | 49                 | 13                          | 13               | 59              | 38               | 10              | 6     | 16      | 214                                                |
| <b>(K=165)</b>     | (37%)                           | (23%)              | (6%)                        | (6%)             | (28%)           | (18%)            | (5%)            | (3%)  | (8%)    |                                                    |

Note: <sup>a</sup>ITT=Full Random Sample or Full Random Sample (likely) categories; K=study, column description: (1) Full random sample (analyses involved the total randomized N's), (2) Full random sample (likely) (appears to be using the full randomized sample, but N's are not reported with analyses), (3) Random sample followed-up (attempted to follow-up all randomized participants regardless of amount of medication/treatment completed, and conducted analyses on this sample), (4) Sufficient dose (analyses conducted on only those participants who received a minimum amount of medication/treatment), (5) Completer sample (analyses conducted on only those patients who completed the medication/treatment phase), (6) False inclusion (after randomization, participant is found to not meet inclusion criteria and is subsequently removed from the analyses), (7) Other (analyses report N's or degrees of freedom that are less than what would be expected for the randomized N, but no explanation on the participants included or excluded from the analysis is provided), and (8) Unclear (insufficient information to determine the sample analyzed). Only categories (1) Full random sample and (2) Full random sample (likely) are considered a "true" ITT strategy, whereas the others are considered something other than ITT.

1  
2  
3  
4  
5  
6  
7  
8  
9  
10  
11 Regarding the specific data analytic strategy used, the values in each row of Table 1 do  
12 not sum to the total number of studies in the first column (i.e., "Reported Using ITT") due to 45  
13 studies utilizing both ITT and non-ITT analyses (e.g., conducted an ITT analysis assuming  
14 failure for dichotomous outcomes AND also used a complete cases approach for continuous  
15 outcomes). In such instances, we coded "Reported Using ITT" as "Yes" if the study mentioned  
16 using an ITT strategy and coded it as "No" otherwise (i.e., no mention of using an ITT strategy).  
17  
18  
19  
20  
21

22 The most common approach utilized in studies reporting the use of an ITT strategy, other  
23 than use of a true ITT ( $K=29$ ; 39%), involved analyses of data for participants who completed a  
24 "sufficient dose" of the medication/treatment ( $K=40$ ; 39%). All other strategies were utilized  
25 <10% of the time. The most common analytic method used in studies not mentioning an ITT  
26 strategy was actually a true ITT analysis ( $K=32$ ; 29%), followed by analyses of data from  
27 completer samples ( $K=31$ ; 28%), analyses for participants who completed a "sufficient dose" of  
28 medication/treatment ( $K=19$ ; 17%), and indeterminable strategies (i.e., Unclear;  $K=16$ ; 14%).  
29  
30  
31  
32  
33  
34

35 Table 2 reports the descriptive information on the missing data strategies employed in the  
36 studies using and not using a true ITT approach. Similar to Table 1, the values in each row of  
37 Table 2 do not sum to the total number of studies in the first column (i.e., "Conducted ITT") due  
38 to 42 studies utilizing multiple missing data strategies. The most common missing data strategy  
39 utilized in studies employing an ITT approach was either unclear ( $K=24$ ; 23%) or involved  
40 censoring data at the end of FU procedure in survival analyses ( $K=23$ ; 22%). A study could be  
41 categorized as employing an ITT strategy, but having an unclear missing data strategy if, for  
42 example, the study reported the full randomized  $N$ s from analyses, but it was unclear what  
43 particular missing data strategy was utilized. The next most frequently used strategies were  
44  
45  
46  
47  
48  
49  
50  
51  
52  
53  
54  
55  
56  
57  
58  
59  
60

1  
2  
3  
4  
5  
6  
7  
8  
9 assuming missing equals relapse or some other poor outcome (“Failure”;  $K=14$ ; 13%) and using  
10 a statistical imputation or interpolation strategy ( $K=14$ ; 13%), such as a mixed effects model. All  
11 other missing data strategies were utilized  $\leq 10\%$  of the time, except the last observation carried  
12 forward (LOCF) procedure that was used in ( $K=12$ ) 11% of the studies.  
13  
14  
15  
16  
17  
18  
19  
20  
21  
22  
23  
24  
25  
26  
27  
28  
29  
30  
31  
32  
33  
34  
35  
36  
37  
38  
39  
40  
41  
42  
43  
44  
45  
46  
47  
48  
49  
50  
51  
52  
53  
54  
55  
56  
57  
58  
59  
60

Table 2.

| Conducted True ITT | Missing Data Strategy |                          |                                     |                   |                   |          |                                        |                  |        |           |          | Total Number of ITT and/or Non-ITT Approaches Used |
|--------------------|-----------------------|--------------------------|-------------------------------------|-------------------|-------------------|----------|----------------------------------------|------------------|--------|-----------|----------|----------------------------------------------------|
|                    | No Tx or FU Dropout   | All FU (some tx dropout) | Imputation or Interpolation Imputed | Missing = Failure | Baseline Assigned | LOCF     | Censored (end of FU) Survival Analysis | Mean Substituted | Other  | Sample FU | Unclear  |                                                    |
| No (K=104)         | 0                     | 0                        | 6 (4%)                              | 23 (17%)          | 1 (1%)            | 22 (16%) | 25 (18%)                               | 3 (2%)           | 2 (1%) | 38 (27%)  | 17 (12%) | 139                                                |
| Yes (K=61)         | 1 (1%)                | 2 (2%)                   | 14 (13%)                            | 14 (13%)          | 1 (1%)            | 12 (11%) | 23 (22%)                               | 2 (2%)           | 1 (1%) | 11 (10%)  | 24 (23%) | 105                                                |
| Total (K=165)      | 1 (>1%)               | 2 (>1%)                  | 20 (07%)                            | 37 (16%)          | 2 (>1%)           | 34 (13%) | 48 (19%)                               | 5 (2%)           | 3 (1%) | 49 (19%)  | 41 (16%) | 259 <sup>a</sup>                                   |

Formatted: Font: 9 pt  
Formatted Table

Note. Column description: (1) No dropout, (2) Followed-up (some dropout) (there were drop-outs from treatment, but all participants, including dropouts were followed-up), (3) ~~Interpolated~~Imputed (used a statistical analysis that ~~interpolated~~imputed missing data, e.g., mixed-model interpolation), (4) Failure (assumed that missing data = failure, e.g., relapse), (5) Baseline assigned (assigned a person's baseline score if the outcome score was missing), (6) LOCF (used an imputation strategy of Last Observation Carried Forward), (7) Censored (end of FU) (data presented in a survival analysis), (8) Mean (used the mean for each person across available assessments/timepoints), (9) Other (other imputation strategy), (10) Sample FU (conducted analyses on the sample of participants that the researchers was able to follow-up), (11) Unclear (no information provided/unclear).

~~It was unclear whether an ITT analysis was conducted or not for 15 analyses.~~

1  
2  
3  
4  
5  
6  
7  
8  
9  
10  
11 The most common missing data method utilized in studies not conducting a true ITT  
12 analysis was analyzing the sample followed-up ( $K=38$ ; 27%), followed by censoring at the end  
13 of FU procedure ( $K=25$ ; 18%), assuming failure (“Failure”;  $K=23$ ; 17%), last observation carried  
14 forward ( $K=23$ ; 16%) and an unclear strategy ( $K=17$ ; 12%). All other missing data strategies  
15 were used  $\leq 10\%$  of the time. A study could be categorized as *not* employing an ITT strategy, but  
16 still using a missing data strategy of assuming failure or last observation carried forward if, for  
17 example, the study assumed failure for missing participants, but something less than the full  
18 randomized  $N$ s were reported for analyses. Tables 3 and 4 display changes in ITT analyses and  
19 missing data strategies over time. No statistically significant change (although marginally  
20 significant trend) was changes were found in use of true ITT analyses over time (Table 3). This  
21 relationship is depicted graphically with time on the x-axis, probability (of being an ITT) from  
22 generalized linear model results on the y-axis, and raw study values (0= not ITT, 1=ITT)  
23 displayed as points. The 95% confidence intervals are displayed as a grey line around the  
24 probability slope.

25  
26  
27  
28  
29  
30  
31  
32  
33  
34  
35  
36  
37 ~~Several-However, several~~ statistically significant relationships between missing data  
38 strategy and time emerged, as displayed in Table 4. Specifically, censored at end of FU (for  
39 survival analyses), last observation carried forward (LOCF), and using a statistical analysis to  
40 impute/interpolate missing data (Imputed/Interpolated, e.g., mixed-model interpolation) have  
41 become more common over time, whereas analyses conducted on only the ~~sample~~ sample of  
42 participants that the researchers were able to follow-up (Sample FU) has become less common.  
43  
44  
45  
46  
47  
48 To explore whether increasing use of certain missing data strategies over time was confounded  
49 with longitudinal methods being increasingly employed, a proxy dummy control variable  
50  
51  
52  
53  
54  
55  
56  
57  
58  
59  
60

1  
2  
3  
4  
5  
6  
7  
8  
9  
10  
11  
12  
13  
14  
15  
16  
17  
18  
19  
20  
21  
22  
23  
24  
25  
26  
27  
28  
29  
30  
31  
32  
33  
34  
35  
36  
37  
38  
39  
40  
41  
42  
43  
44  
45  
46  
47  
48  
49  
50  
51  
52  
53  
54  
55  
56  
57  
58  
59  
60

(0=only end-of treatment assessment, 1= posttreatment and follow-up assessment(s)) was added to the analyses; the results were virtually unchanged.

For peer review only

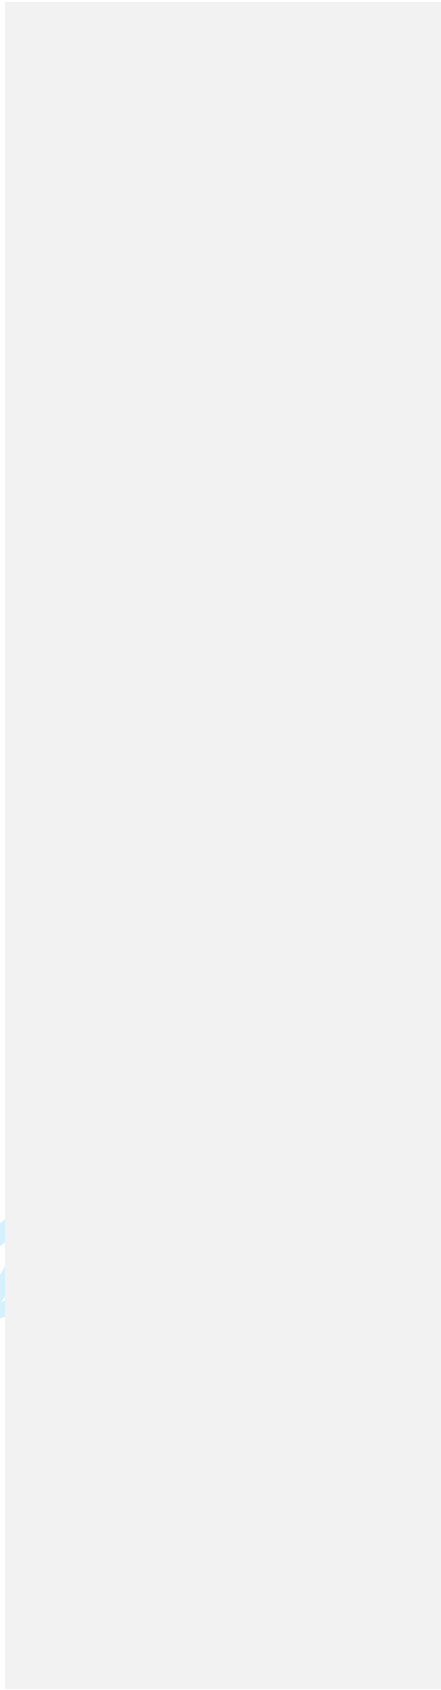

Table 3. Change in true ITT analyses over time

|             | Estimate | SE     | t-value | P      |
|-------------|----------|--------|---------|--------|
| (Intercept) | -1.5244  | 0.6462 | -2.3933 | 0.02*  |
| Year        | 0.0403   | 0.02   | 1.8554  | 0.0642 |

Note: generalized linear model with binary outcome (ITT analyses conducted=1 or not=0). \*=p-value <.05> k=165

Table 4. Change in missing data strategy over time

|                       | Estimate | SE   | z-value | P          |
|-----------------------|----------|------|---------|------------|
| Fail                  | 0.03     | 0.02 | 1.38    | 0.16       |
| All FU                | -0.10    | 0.09 | -1.18   | 0.24       |
| All FU (some dropout) | -0.09    | 0.06 | -1.43   | 0.15       |
| Baseline Assigned     | 0.47     | 0.36 | 1.31    | 0.19       |
| Censored (end of FU)  | 0.09     | 0.03 | 3.19    | <0.01***   |
| LOCF                  | 0.06     | 0.03 | 2.01    | 0.045*     |
| Grp Avg               | 0.07     | 0.12 | 0.62    | 0.54       |
| Mean FU points        | 0.07     | 0.07 | 0.92    | 0.36       |
| Other                 | 0.05     | 0.09 | 0.55    | 0.59       |
| Sample FU             | -0.10    | 0.02 | -4.40   | <0.001**** |
| Interpolation Imputed | 0.33     | 0.09 | 3.83    | <0.001**** |
| Unclear               | 0.02     | 0.02 | 0.94    | 0.35       |

Note: generalized linear model with binary outcome. \*=p-value <.05

Formatted Table

Formatted Table

Formatted Table



## Discussion

Across the 165 pharmacotherapy trials included in this analysis, less than half of the 74 studies reporting to have used an ITT strategy actually did so. This finding likely is due, at least in part, to a lack of a consensual definition of what constitutes an ITT analysis. In fact, the most common procedure for studies reporting, but not actually using an ITT, involved analyses on participants who completed a sufficient dose of treatment. That is, analyses were conducted on data for only those participants who completed a certain amount of treatment or who received a minimum intervention. This type of analysis is generally considered a "per protocol" approach, which contrasts to an ITT approach which includes outcome data for all participants, regardless of adherence to treatment [2].

Among the studies conducting a true ITT strategy, it was unclear what missing data strategy was used in nearly 25% of these studies. Lack of clarity in journal articles about how missing data were handled makes it difficult for readers to critically assess the study findings. A per protocol analysis answers questions of an explanatory nature, e.g., "how efficacious is this treatment for those adherent to the treatment?" In contrast, an ITT analysis provides more realistic (and usually less biased) estimates of the average treatment effects in the "real-world," as it accounts for both patient dropout and non-adherence to treatment. If findings from a per protocol analysis are incorrectly perceived as coming from an ITT analysis, treatment effects under more routine conditions of care will be overestimated. Journal editors and peer reviewers should be attentive to these issues and request that authors provide a clear description of the sample analyzed (i.e., ITT, modified ITT, per protocol) in their studies, along with details regarding how missing data were handled.

Field Code Changed

Formatted: Not Superscript/ Subscript

1  
2  
3  
4  
5  
6  
7  
8  
9 Because missing data strategies are becoming more sophisticated and are being facilitated  
10 by computer technology that is easily able to process data using complex algorithms, the  
11 diversity of missing data strategies that are employed is increasing ~~in number~~. Indeed, our  
12 findings indicate that more complex imputation procedures are becoming more prevalent over  
13 time. One such imputation procedure is Multiple Imputation, [3] which involves a Bayesian  
14 estimation procedure to average outcomes across multiple imputed datasets. Missing data are  
15 then replaced with a probable value based on other available variables in the data. Presumably,  
16 the results with this approach more closely approximate the results of an ITT analysis with 100%  
17 follow-up than any other method of handling missing data that is currently available.  
18  
19  
20  
21  
22  
23  
24

## 25 **Conclusion**

26  
27 Discrepancies in reporting versus actually conducting true ITT analyses were apparent in  
28 this body of alcohol pharmacotherapy trials. Lack of clarity regarding the missing data strategy  
29 used also was common. The degree to which these problems are present in reports of trials of  
30 pharmacotherapies and psychosocial interventions for other conditions remains to be determined.  
31 In addition, consensus on a standard definition of ITT is needed, as are clearer reporting  
32 standards for analyses and the handling of missing data in reports of clinical trials.  
33  
34  
35  
36  
37  
38  
39  
40  
41  
42  
43  
44  
45  
46  
47  
48  
49  
50  
51  
52  
53  
54  
55  
56  
57  
58  
59  
60

1  
2  
3  
4  
5  
6  
7  
8  
9  
10  
11  
12  
13  
14  
15  
16  
17  
18  
19  
20  
21  
22  
23  
24  
25  
26  
27  
28  
29  
30  
31  
32  
33  
34  
35  
36  
37  
38  
39  
40  
41  
42  
43  
44  
45  
46  
47  
48  
49  
50  
51  
52  
53  
54  
55  
56  
57  
58  
59  
60

**Acknowledgments**

Preparation of this manuscript was supported by U.S. National Institute on Alcohol Abuse and Alcoholism Grant No. AA008689 and the U.S. Department of Veterans Affairs, Office of Research and Development, Health Services Research and Development Service and Substance Use Disorder Quality Enhancement Research Initiative. The views expressed are those of the authors and do not necessarily represent the views of the National Institute on Alcohol Abuse and Alcoholism, the Department of Veterans Affairs, or any other U.S. Government entity.

1  
2  
3  
4  
5  
6  
7  
8  
9 **Ethics**

10 No ethics approval was required for completion of this study. It aggregated previously published  
11 journal articles.  
12  
13  
14  
15  
16  
17  
18  
19  
20  
21  
22  
23  
24  
25  
26  
27  
28  
29  
30  
31  
32  
33  
34  
35  
36  
37  
38  
39  
40  
41  
42  
43  
44  
45  
46  
47  
48  
49  
50  
51  
52  
53  
54  
55  
56  
57  
58  
59  
60

For peer review only

1  
2  
3  
4  
5  
6  
7  
8  
9  
10  
11  
12  
13  
14  
15  
16  
17  
18  
19  
20  
21  
22  
23  
24  
25  
26  
27  
28  
29  
30  
31  
32  
33  
34  
35  
36  
37  
38  
39  
40  
41  
42  
43  
44  
45  
46  
47  
48  
49  
50  
51  
52  
53  
54  
55  
56  
57  
58  
59  
60

**ICMJE uniform disclosure**

All authors have completed the ICMJE uniform disclosure form at [www.icmje.org/coi\\_disclosure.pdf](http://www.icmje.org/coi_disclosure.pdf) and declare: no support from any organization for the submitted work; no financial relationships with any organizations that might have an interest in the submitted work in the previous three years; no other relationships or activities that could appear to have influenced the submitted work.

### Contributorship Information

A. C. Del Re was involved in the study's design, analysis and interpretation of data, drafting the article and revising it. Natalya C. Maisel was involved in the study's design and revising the article. Janet Blodgett was involved in the study's design. John W. Finney was involved in the study's conception and design, interpretation of data, and revising it critically for important intellectual content. All authors gave final approval of the version to be published.

**Copyright/license for publication**

The Corresponding Author has the right to grant on behalf of all authors and does grant on behalf of all authors, a worldwide license to the Publishers and its licensees in perpetuity, in all forms, formats and media (whether known now or created in the future), to i) publish, reproduce, distribute, display and store the Contribution, ii) translate the Contribution into other languages, create adaptations, reprints, include within collections and create summaries, extracts and/or, abstracts of the Contribution, iii) create any other derivative work(s) based on the Contribution, iv) to exploit all subsidiary rights in the Contribution, v) the inclusion of electronic links from the Contribution to third party material where-ever it may be located; and, vi) license any third party to do any or all of the above.

- 1 Gupta SK. Intention-to-treat concept: A review. *Perspect Clin Res* 2011;**2**:109–12.  
[doi:10.4103/2229-3485.83221](https://doi.org/10.4103/2229-3485.83221)
- 2 Hollis S, Campbell F. What is meant by intention to treat analysis? Survey of published randomised controlled trials. *Bmj* 1999;**319**:670–4.
- 3 Little RJ, Rubin DB. *Statistical analysis with missing data*. Wiley New York 1987.
- 4 Ruiz-Canela M, Martínez-González MA, de Irala-Estévez J. Intention to treat analysis is related to methodological quality. *BMJ* 2000;**320**:1007.
- 5 Moher D, Schulz K, Altman D. The CONSORT statement: revised recommendations for improving the quality of reports of parallel group randomized trials. *BMC Med Res Methodol* 2001;**1**:2.
- 6 Schulz KF, Altman DG, Moher D. CONSORT 2010 statement: updated guidelines for reporting parallel group randomised trials. *Int J Surg* Published Online First: 2011.<http://www.sciencedirect.com/science/article/pii/S1743919111005620> (accessed 6 Mar2013).
- 7 Zwarenstein M, Treweek S, Gagnier JJ, *et al*. Improving the reporting of pragmatic trials: an extension of the CONSORT statement. *BMJ* Published Online First: 2008.<http://www.ncbi.nlm.nih.gov/pmc/articles/PMC3266844/> (accessed 6 Mar2013).
- 8 Polit DF, Gillespie BM. Intention-to-treat in randomized controlled trials: recommendations for a total trial strategy. *Res Nurs Health* 2010;**33**:355–68.
- 9 Schulz KF, Grimes DA. Sample size slippages in randomised trials: exclusions and the lost and wayward. *The Lancet* 2002;**359**:781–5.
- 10 Avins AL, Pressman A, Ackerson L, *et al*. Placebo Adherence and Its Association with Morbidity and Mortality in the Studies of Left Ventricular Dysfunction. *J Gen Intern Med* 2010;**25**:1275–81. [doi:10.1007/s11606-010-1477-8](https://doi.org/10.1007/s11606-010-1477-8)
- 11 Granger AL, Fehnel SE, Hogue SL, *et al*. An assessment of patient preference and adherence to treatment with Wellbutrin SR: A web-based survey. *J Affect Disord* 2006;**90**:217–21.  
[doi:10.1016/j.jad.2005.08.018](https://doi.org/10.1016/j.jad.2005.08.018)
- 12 Schwartz D, Lellouch J. Explanatory and pragmatic attitudes in therapeutical trials. *J Clin Epidemiol* 2009;**62**:499–505.
- 1342 Maisel NC, Blodgett JC, Wilbourne PL, *et al*. Meta-analysis of naltrexone and acamprosate for treating alcohol use disorders: when are these medications most helpful? *Addiction* 2013;**108**:275–93. [doi:10.1111/j.1360-0443.2012.04054.x](https://doi.org/10.1111/j.1360-0443.2012.04054.x)





## Intention-to-Treat Analyses and Missing Data Approaches in Pharmacotherapy Trials for Alcohol Use Disorders

|                                 |                                                                                                                                                                                                                                                                           |
|---------------------------------|---------------------------------------------------------------------------------------------------------------------------------------------------------------------------------------------------------------------------------------------------------------------------|
| Journal:                        | <i>BMJ Open</i>                                                                                                                                                                                                                                                           |
| Manuscript ID:                  | bmjopen-2013-003464.R2                                                                                                                                                                                                                                                    |
| Article Type:                   | Research                                                                                                                                                                                                                                                                  |
| Date Submitted by the Author:   | 27-Sep-2013                                                                                                                                                                                                                                                               |
| Complete List of Authors:       | Del Re, AC; VA Palo Alto, Maisel, Natalya; VA Palo Alto, Blodgett, Janet; VA Palo Alto, Finney, John; VA Palo Alto Health Care System (152MPD), Center for Health Care Evaluation; Stanford University School of Medicine, Department of Psychiatry & Behavioral Sciences |
| <b>Primary Subject Heading</b>: | Research methods                                                                                                                                                                                                                                                          |
| Secondary Subject Heading:      | Pharmacology and therapeutics, Addiction                                                                                                                                                                                                                                  |
| Keywords:                       | STATISTICS & RESEARCH METHODS, CLINICAL PHARMACOLOGY, Substance misuse < PSYCHIATRY                                                                                                                                                                                       |
|                                 |                                                                                                                                                                                                                                                                           |

SCHOLARONE™  
Manuscripts

1  
2  
3 Intention-to-Treat Analyses and Missing Data Approaches in Pharmacotherapy Trials for  
4  
5  
6 Alcohol Use Disorders

7  
8 A. C. Del Re, Natalya C. Maisel, Janet C. Blodgett, John W. Finney  
9

10  
11  
12  
13 Research Health Science Specialist, Center for Health Care Evaluation, VA Palo Alto Health  
14 Care System (152MPD), 795 Willow Rd, Menlo Park, CA 94025, aaron.delre@va.gov, 650-493-  
15 5000 x2-25842, Fax: 650- 617-2736, A. C. Del Re  
16

17 Research Health Science Specialist, Center for Health Care Evaluation, VA Palo Alto Health  
18 Care System (152MPD), 795 Willow Rd, Menlo Park, CA 94025, natalya.maisel@va.gov, 650-  
19 493-5000 x2-26966, Natalya C. Maisel  
20

21 Research Associate, Center for Health Care Evaluation, VA Palo Alto Health Care System  
22 (152MPD), 795 Willow Rd, Menlo Park, CA 94025, janet.blodgett@va.gov, 650-493-5000 x2-  
23 27292, Janet Blodgett  
24

25 Research Health Science Specialist, Center for Health Care Evaluation, VA Palo Alto Health  
26 Care System (152MPD), 795 Willow Rd, Menlo Park, CA 94025, john.finney@va.gov, (650)  
27 493-5000 x2-22848, John W. Finney  
28

29  
30 Correspondence to: A. C. Del Re aaron.delre@va.gov  
31

32  
33 Keywords: intention to treat, missing data strategies, research methods  
34

35  
36 Word count: 3,557, abstract: 298, references: 12, tables: 4  
37  
38  
39  
40  
41  
42  
43  
44  
45  
46  
47  
48  
49  
50  
51  
52  
53  
54  
55  
56  
57  
58  
59  
60

**Abstract**

*Objectives:* Intention-to-treat (ITT) is an analytic strategy for reducing potential bias in treatment effects arising from missing data in randomized controlled trials (RCT). Currently, no universally accepted definition of ITT exists, although many researchers consider it to require either no attrition or a strategy to handle missing data. Using the reports of a large pool of randomized controlled trials, we examined discrepancies between the types of analyses that alcohol pharmacotherapy researchers stated they used versus those they actually used. We also examined the linkage between analytic strategy (i.e., ITT or not) and how missing data on outcomes were handled (if at all), and whether data analytic and missing data strategies have changed over time.

*Design:* Descriptive statistics were generated for reported and actual data analytic strategy and for missing data strategy. In addition, generalized linear models determined changes over time in the use of ITT analyses and missing data strategies.

*Setting:* N/A

*Participants:* 165 RCTs of pharmacotherapy for alcohol use disorders.

*Primary and secondary outcome measures:* N/A

*Results:* Of the 165 studies, 74 reported using an ITT strategy. However, less than 40% of the studies actually conducted ITT according to the rigorous definition above. Whereas no change in the use of ITT analyses over time was found, censored (last follow-up completed) and imputed missing data strategies have increased over time, while analyses of data only for the sample actually followed have decreased.

*Conclusions:* Discrepancies in reporting versus actually conducting ITT analyses were found in this body of RCTs. Lack of clarity regarding the missing data strategy used was common. Consensus on a definition of ITT is important for adequate understanding of research findings.

1  
2  
3 Clearer reporting standards for analyses and the handling of missing data in pharmacotherapy  
4  
5 trials and other intervention studies are needed.  
6  
7  
8  
9

## 10 **Strengths and Limitations**

### 13 Strengths

- 14 • First study to examine ITT practices in RCT pharmacotherapy trials for alcohol misuse.
- 15 • Included a large body of studies in the analyses.
- 16 • Examined changes over time in data analytic and missing data strategies across nearly 40
- 17 years of scientific research.
- 18 • Findings important for improving reporting practices in RCTs of pharmacotherapy trials
- 19 for alcohol misuse.
- 20
- 21
- 22
- 23
- 24

### 25 Limitations

- 26 • Descriptive analyses could not determine whether there is any relationship between ITT
- 27 and effect sizes.
- 28
- 29
- 30
- 31
- 32
- 33
- 34
- 35
- 36
- 37
- 38
- 39
- 40
- 41
- 42
- 43
- 44
- 45
- 46
- 47
- 48
- 49
- 50
- 51
- 52
- 53
- 54
- 55
- 56
- 57
- 58
- 59
- 60

1  
2  
3  
4  
5  
6  
7  
8  
9  
10  
11  
12  
13  
14  
15  
16  
17  
18  
19  
20  
21  
22  
23  
24  
25  
26  
27  
28  
29  
30  
31  
32  
33  
34  
35  
36  
37  
38  
39  
40  
41  
42  
43  
44  
45  
46  
47  
48  
49  
50  
51  
52

In pharmacotherapy trials, participants typically are randomly assigned to a pharmacotherapy or a placebo (control) condition. With a sufficient sample size, randomization usually produces separate groups *without* systematic differences by equalizing factors within groups that may be associated with outcome (e.g., motivation, age, gender). Under ideal circumstances, the randomization process allows valid causal inferences to be made about the impact of the pharmacotherapy compared to the control condition. That is, one can be highly confident that any post-treatment differences in outcome are attributable to the impact of the medication itself and not to pre-existing differences in the characteristics of the pharmacotherapy and placebo samples. However, when the randomization process is disrupted, either through treatment dropout and/or missing data on outcomes, or when the original sample as randomized is not the same sample analyzed (analyzed N < randomized N), bias may be introduced that compromises the internal validity of results. [1–4]

32  
33  
34  
35  
36  
37  
38  
39  
40  
41  
42  
43  
44  
45  
46  
47  
48  
49  
50  
51  
52

The intention-to-treat (ITT) analytic strategy is one solution for eliminating or reducing bias in treatment effects arising from missing outcome data in randomized controlled trials (RCTs). [1,2] Although no universally accepted definition of ITT currently exists, the procedure nevertheless is endorsed in the Consolidated Standards for Reporting Trials (CONSORT). [5–7] One particularly succinct definition of a "true ITT" [8] analysis is "once randomized, always analyzed." [9] Under this definition, ITT involves analysis of *all* trial participants who were randomized, regardless of adherence to treatment protocol (e.g., dropout/withdrawal or protocol deviations). In other words, defined this way, ITT requires either no attrition or a strategy to handle missing data.

53  
54  
55  
56  
57  
58  
59  
60

ITT has several strengths, including (1) helping to preserve the integrity of the randomization process (i.e., groups are expected to be similar except for random variation and

1  
2  
3 receipt of treatment/control condition) and (2) providing a more realistic estimate of average  
4 treatment effects in the "real-world" as it is the norm for some patients to dropout or not adhere  
5 to treatment. [1] Both points above address the issue of patient dropout, as analyses on only  
6 adherent patients likely would lead to inflated estimates of treatment effects. Research has shown  
7 that adherent patients generally do better than non-adherent patients, regardless of treatment.  
8 [10,11] The more realistic estimates of treatment effects under conditions of routine care that are  
9 derived from ITT analyses have particular relevance for policy makers and those interested in  
10 hypotheses of pragmatic ("real world") importance.  
11  
12  
13  
14  
15  
16  
17  
18  
19  
20  
21

22 A variant of the ITT approach, what Polit and Gillespie (2010) term a "modified ITT"  
23 analysis, maintains the conditions to which people were randomly assigned and attempts to  
24 follow-up all participants, regardless of their participation in the intervention. However, only  
25 those successfully followed are included in the analyses. With this modified approach, however,  
26 the balance in pre-existing characteristics across conditions sought through random assignment is  
27 less likely to hold.  
28  
29  
30  
31  
32  
33  
34  
35

36 An alternative to ITT analysis, the *per protocol* analytic procedure (i.e., analyses based  
37 on only "adherent" participants in randomized samples), has strengths as well and is of particular  
38 importance for hypotheses of an explanatory nature.[12] The per protocol approach can range  
39 from analyses in which only those research participants who began treatment are included, to  
40 those in which only participants who received what was deemed a "sufficient dose" of treatment  
41 are used, to those in which only participants who fully completed treatment are included [also  
42 referred to as a 'complete cases' approach; 2]. Advocates of per protocol approach assert that the  
43 analysis tests the true efficacy of the intervention when used as directed (i.e., efficacy among  
44 those who are adherent and able to tolerate the treatment).  
45  
46  
47  
48  
49  
50  
51  
52  
53  
54  
55  
56  
57  
58  
59  
60

1  
2  
3 Because both ITT and per protocol approaches to RCT analyses have their strengths, a  
4 possible strategy is to conduct an ITT analysis, with a per protocol sensitivity analysis to  
5  
6 “bracket” likely effects under different conditions. Nevertheless, ITT analyses are considered  
7  
8 the "gold standard" and researchers frequently report the use of this procedure in published  
9  
10 literature, even in the absence of a consensual definition. Discrepancies can arise, however,  
11  
12 between the type of analyses researchers state in research reports that they conducted and what  
13  
14 they *actually* did with respect to use of a “true” ITT analysis or some other procedure based on  
15  
16 less than the full randomized sample. For example, in clinical trials in the nursing field, Polit  
17  
18 and Gillespie (2009) found that for 10.5% of studies, researchers who stated they had used an  
19  
20 ITT approach had actually conducted per protocol analyses.  
21  
22  
23  
24  
25  
26

27 It is unknown to what degree ITT strategies are being employed in pharmacotherapy for  
28  
29 alcohol use disorders. One aim of this review was to determine if there are discrepancies between  
30  
31 the types of analyses that researchers stated they used and those they actually used, based on  
32  
33 information in reports of a large pool of randomized controlled trials of pharmacotherapy for  
34  
35 alcohol use disorders published between 1970 to 2009. A second aim was to describe the use of  
36  
37 different missing data strategies in studies in which true and modified ITT analyses were and  
38  
39 were not conducted. The final aim was to determine whether the use of different data analytic  
40  
41 approaches and certain types of missing data approaches (e.g., multiple imputation) has  
42  
43 increased over time while the use of others has decreased.  
44  
45  
46  
47

## 48 **Methods**

### 49 **Literature Search**

50  
51 As part of a larger project examining the efficacy of pharmacotherapies for alcohol use  
52  
53 disorders and alcohol misuse, [i.e., 13] we identified relevant randomized controlled trials via  
54  
55  
56  
57  
58  
59  
60

1  
2  
3 several searches of PubMed and PsycINFO conducted at different points over the past decade.  
4  
5 Study inclusion criteria were (a) a focus on treating alcohol misuse or an alcohol use disorder;  
6  
7 (b) participants 18 years of age or older; (c) publication between 1970 and 2009; (d) a report in  
8  
9 the English language; and (e) random assignment of at least five participants each to medication  
10  
11 and placebo groups. The details of inclusion/exclusion criteria can be found in Maisel et al.[12]  
12  
13

14  
15 Searches were intermittent due to sporadic availability of funds and resources. For  
16  
17 example, in one search we used search terms for various medications (e.g., “naltrexone”), terms  
18  
19 for alcohol problems and use disorders and alcohol misuse (e.g., “alcohol\*,” “problem drinking”)  
20  
21 and terms for randomized controlled trials (e.g., “randomized controlled,” “clinical trial”). This  
22  
23 search yielded 1,602 potential research reports. Based on examination of abstracts and, in some  
24  
25 cases, full text versions of these reports, 1,184 were identified as not relevant (e.g., qualitative  
26  
27 studies, reviews). Of the remaining articles, 215 were rejected based on not meeting our  
28  
29 eligibility criteria (e.g., open-label trial), 138 articles met the inclusion criteria, but 65 were  
30  
31 additional publications for studies already in the dataset (e.g., reporting secondary analyses). In  
32  
33 addition to the database searches, we perused the reference sections from the reports of the  
34  
35 included studies and from previously published reviews of this literature. For the present  
36  
37 analysis, a total of 165 studies met our inclusion criteria  
38  
39  
40  
41  
42

### 43 **Variables**

44  
45 Descriptive and inferential statistics were generated for two categorical variables: (1) sample  
46  
47 analyzed and (2) missing data strategy. The categories of the “sample analyzed” variable were:

- 48  
49 (1) Full random sample - analyses involved the total randomized N’s (with or without  
50  
51 imputation or interpolation of missing data).  
52  
53  
54  
55  
56  
57  
58  
59  
60



1  
2  
3 (2) Full random sample (likely) - analyses appeared to use the full randomized sample,  
4 but N's were not reported.  
5  
6

7  
8 (3) Random sample followed-up - attempted to follow-up all randomized participants.  
9  
10 regardless of amount of medication/treatment completed and conducted analyses on this  
11 sample. Note there is no overlap between categories 1 ("Full random sample") or 2 ("Full  
12 random sample (likely)") and "Random sample followed-up".  
13  
14

15  
16 (4) Sufficient dose - analyses were conducted for only those participants who completed  
17 a specified amount of treatment or who received at least a minimum dose of treatment.  
18  
19

20  
21 (5) Completer sample - analyses conducted for only those patients who completed the  
22 medication/treatment phase.  
23  
24

25  
26 (6) False inclusion - after randomization, participants were found to not meet inclusion  
27 criteria and were subsequently removed from the analyses.  
28  
29

30  
31 (7) Other - reported N's or degrees of freedom that were less than what would be  
32 expected for the randomized N, but no explanation of the participants included or  
33 excluded from the analysis was provided.  
34  
35  
36

37  
38 (8) Unclear – insufficient information was provided to determine the sample analyzed.  
39

40  
41 Only analyses conducted on the Full Random Sample or Full Random Sample (likely) categories  
42 were deemed to be “true” ITT analyses, whereas the others were considered something other  
43 than ITT analyses.  
44  
45  
46

47  
48 The categories for the “missing data strategy” variable were as follows:  
49

50 (1) No dropout – no dropout from treatment and 100% reassessed.  
51

52 (2) All followed - there were drop-outs from treatment, but all participants, including  
53 treatment dropouts, were reassessed.  
54  
55  
56  
57  
58  
59  
60

- (3) Statistical interpolation - used a statistical analysis that interpolated missing data, e.g., mixed effects model interpolation.
- (4) Failure assumed for missing data (missing = failure) - assumed that missing data reflected poor outcome, e.g., relapse.
- (5) Baseline assigned - a participant's baseline score was assigned if outcome data were missing.
- (6) LOCF - used the imputation strategy of Last Observation Carried Forward.
- (7) Censored – last assessment point was used in survival analyses.
- (8) Mean - used the mean of the sample followed for missing data.
- (9) Other – used some other imputation of missing data strategy.
- (10) Sample followed - conducted analyses with data for the sample of participants that the researchers were able to follow/reassess.
- (11) Unclear - no or unclear information provided.

### Statistical Analyses

Descriptive statistics were generated for data analytic strategies and missing data strategies used in the 165 RCTs of pharmacotherapies for AUD and alcohol misuse. Generalized linear model analyses were conducted to determine changes in both data analytic and missing data strategy over time. In those analyses, the response variables, data analytic strategy and missing data strategy, were coded as binary (0='No', 1='Yes'), with year of publication as predictor of a 'Yes' response.

### Results

As noted in Table 1, a substantial discrepancy was evident between reporting an ITT strategy versus actually conducting a “true” ITT analysis (i.e., reporting an ITT strategy when

1  
2  
3 something other than ITT was conducted). Of the 165 studies included in this review, 74  
4  
5 reported using an ITT strategy. However, less than half of those studies conducted a true ITT  
6  
7 analysis ( $K=29$ ; 39%) according to information in study reports. Interestingly, 35% ( $K=32$ ) of the  
8  
9 91 studies whose reports made *no* claim of using an ITT strategy, in fact, *did* perform true ITT  
10  
11 analyses.  
12  
13  
14  
15  
16  
17  
18  
19  
20  
21  
22  
23  
24  
25  
26  
27  
28  
29  
30  
31  
32  
33  
34  
35  
36  
37  
38  
39  
40  
41  
42  
43  
44  
45  
46  
47  
48  
49  
50  
51  
52  
53  
54  
55  
56  
57  
58  
59  
60

Table 1.

| Reported Using ITT   | Conducted True ITT <sup>a</sup> | Sample Analyzed    |                             |                  |                 |                  |                 |        |          | Total Number of ITT and/or Non-ITT Approaches Used |
|----------------------|---------------------------------|--------------------|-----------------------------|------------------|-----------------|------------------|-----------------|--------|----------|----------------------------------------------------|
|                      |                                 | Full Random Sample | Full Random Sample (likely) | Random Sample FU | Sufficient Dose | Completer Sample | False Inclusion | Other  | Unclear  |                                                    |
| <b>No (K=91)</b>     | 32 (35%)                        | 28 (25%)           | 4 (4%)                      | 6 (5%)           | 19 (17%)        | 31 (28%)         | 2 (2%)          | 4 (4%) | 16 (14%) | 112                                                |
| <b>Yes (K=74)</b>    | 29 (39%)                        | 21 (21%)           | 9 (9%)                      | 7 (7%)           | 40 (39%)        | 7 (7%)           | 8 (8%)          | 2 (2%) | 0 (0%)   | 102                                                |
| <b>Total (K=165)</b> | 61 (37%)                        | 49 (23%)           | 13 (6%)                     | 13 (6%)          | 59 (28%)        | 38 (18%)         | 10 (5%)         | 6 (3%) | 16 (8%)  | 214                                                |

Note: <sup>a</sup>ITT=Full Random Sample or Full Random Sample (likely) categories; K=study, column description: (1) Full random sample (analyses involved the total randomized N's), (2) Full random sample (likely) (appears to be using the full randomized sample, but N's are not reported with analyses), (3) Random sample followed-up (attempted to follow-up all randomized participants regardless of amount of medication/treatment completed, and conducted analyses on this sample), (4) Sufficient dose (analyses conducted on only those participants who received a minimum amount of medication/treatment), (5) Completer sample (analyses conducted on only those patients who completed the medication/treatment phase), (6) False inclusion (after randomization, participant is found to not meet inclusion criteria and is subsequently removed from the analyses), (7) Other (analyses report N's or degrees of freedom that are less than what would be expected for the randomized N, but no explanation on the participants included or excluded from the analysis is provided), and (8) Unclear (insufficient information to determine the sample analyzed). Only categories (1) Full random sample and (2) Full random sample (likely) are considered a "true" ITT strategy, whereas the others are considered something other than ITT.

1  
2  
3  
4  
5  
6 Regarding the specific data analytic strategy used, the values in each row of Table 1 do  
7  
8 not sum to the total number of studies in the first column (i.e., "Reported Using ITT") due to 45  
9  
10 studies utilizing both ITT and non-ITT analyses (e.g., conducted an ITT analysis assuming  
11  
12 failure for dichotomous outcomes AND also used a complete cases approach for continuous  
13  
14 outcomes). In such instances, we coded "Reported Using ITT" as "Yes" if the study mentioned  
15  
16 using an ITT strategy and coded it as "No" otherwise (i.e., no mention of using an ITT strategy).  
17  
18  
19

20 The most common approach utilized in studies reporting the use of an ITT strategy, other  
21  
22 than use of a true ITT ( $K=29$ ; 39%), involved analyses of data for participants who completed a  
23  
24 "sufficient dose" of the medication/treatment ( $K=40$ ; 39%). All other strategies were utilized  
25  
26 <10% of the time. The most common analytic method used in studies not mentioning an ITT  
27  
28 strategy was actually a true ITT analysis ( $K=32$ ; 29%), followed by analyses of data from  
29  
30 completer samples ( $K=31$ ; 28%), analyses for participants who completed a "sufficient dose" of  
31  
32 medication/treatment ( $K=19$ ; 17%), and indeterminable strategies (i.e., Unclear;  $K=16$ ; 14%).  
33  
34  
35

36 Table 2 reports the descriptive information on the missing data strategies employed in the  
37  
38 studies using and not using a true ITT approach. Similar to Table 1, the values in each row of  
39  
40 Table 2 do not sum to the total number of studies in the first column (i.e., "Conducted ITT") due  
41  
42 to 42 studies utilizing multiple missing data strategies. The most common missing data strategy  
43  
44 utilized in studies employing an ITT approach was either unclear ( $K=24$ ; 23%) or involved  
45  
46 censoring data at the end of FU procedure in survival analyses ( $K=23$ ; 22%). A study could be  
47  
48 categorized as employing an ITT strategy, but having an unclear missing data strategy if, for  
49  
50 example, the study reported the full randomized  $N$ s from analyses, but it was unclear what  
51  
52 particular missing data strategy was utilized. The next most frequently used strategies were  
53  
54  
55  
56  
57  
58  
59  
60

1  
2  
3 assuming missing equals relapse or some other poor outcome (“Failure”;  $K=14$ ; 13%) and using  
4  
5 a statistical interpolation strategy ( $K=14$ ; 13%), such as a mixed effects model. All other missing  
6  
7 data strategies were utilized  $\leq 10\%$  of the time, except the last observation carried forward  
8  
9 (LOCF) procedure that was used in ( $K=12$ ) 11% of the studies.  
10  
11  
12  
13  
14  
15  
16  
17  
18  
19  
20  
21  
22  
23  
24  
25  
26  
27  
28  
29  
30  
31  
32  
33  
34  
35  
36  
37  
38  
39  
40  
41  
42  
43  
44  
45  
46  
47  
48  
49  
50  
51  
52  
53  
54  
55  
56  
57  
58  
59  
60

For peer review only

Table 2.

| Conducted True ITT             | Missing Data Strategy |                          |               |                   |                   |             |                                        |                  |           |             |             | Total Number of ITT and/or Non-ITT Approaches Used |
|--------------------------------|-----------------------|--------------------------|---------------|-------------------|-------------------|-------------|----------------------------------------|------------------|-----------|-------------|-------------|----------------------------------------------------|
|                                | No Tx or FU Dropout   | All FU (some tx dropout) | Interpolation | Missing = Failure | Baseline Assigned | LOCF        | Censored (end of FU) Survival Analysis | Mean Substituted | Other     | Sample FU   | Unclear     |                                                    |
| <b>No</b><br><b>(K=104)</b>    | 0                     | 0                        | 6<br>(4%)     | 23<br>(17%)       | 1<br>(1%)         | 22<br>(16%) | 25<br>(18%)                            | 3<br>(2%)        | 2<br>(1%) | 38<br>(27%) | 17<br>(12%) | 139                                                |
| <b>Yes</b><br><b>(K=61)</b>    | 1<br>(1%)             | 2<br>(2%)                | 14<br>(13%)   | 14<br>(13%)       | 1<br>(1%)         | 12<br>(11%) | 23<br>(22%)                            | 2<br>(2%)        | 1<br>(1%) | 11<br>(10%) | 24<br>(23%) | 105                                                |
| <b>Total</b><br><b>(K=165)</b> | 1<br>(>1%)            | 2<br>(>1%)               | 20<br>(07%)   | 37<br>(16%)       | 2<br>(>1%)        | 34<br>(13%) | 48<br>(19%)                            | 5<br>(2%)        | 3<br>(1%) | 49<br>(19%) | 41<br>(16%) | 259 <sup>a</sup>                                   |

Note. Column description: (1) No dropout, (2) Followed-up (some dropout) (there were drop-outs from treatment, but all participants, including dropouts were followed-up), (3) Interpolation (used a statistical analysis that interpolated missing data, e.g., mixed effects model interpolation), (4) Failure (assumed that missing data = failure, e.g., relapse), (5) Baseline assigned (assigned a person's baseline score if the outcome score was missing), (6) LOCF (used an imputation strategy of Last Observation Carried Forward), (7) Censored (end of FU) (data presented in a survival analysis), (8) Mean (used the mean for each person across available assessments/timepoints), (9) Other (other imputation strategy), (10) Sample FU (conducted analyses on the sample of participants that the researchers was able to follow-up), (11) Unclear (no information provided/unclear).

1  
2  
3  
4  
5  
6 The most common missing data method utilized in studies not conducting a true ITT  
7  
8 analysis was analyzing the sample followed-up ( $K=38$ ; 27%), followed by censoring at the end  
9  
10 of FU procedure ( $K=25$ ; 18%), assuming failure (“Failure”;  $K=23$ ; 17%), last observation carried  
11  
12 forward ( $K=23$ ; 16%) and an unclear strategy ( $K=17$ ; 12%). All other missing data strategies  
13  
14 were used  $\leq 10\%$  of the time. A study could be categorized as *not* employing an ITT strategy, but  
15  
16 still using a missing data strategy of assuming failure or last observation carried forward if, for  
17  
18 example, the study assumed failure for missing participants, but something less than the full  
19  
20 randomized  $N$ s were reported for analyses. Tables 3 and 4 display changes in ITT analyses and  
21  
22 missing data strategies over time. No statistically significant change (although marginally  
23  
24 significant trend) was found in use of true ITT analyses over time (Table 3). This relationship is  
25  
26 depicted graphically with time on the  $x$ -axis, probability (of being an ITT) from generalized  
27  
28 linear model results on the  $y$ -axis, and raw study values (0= not ITT, 1=ITT) displayed as points.  
29  
30 The 95% confidence intervals are displayed as a grey line around the probability slope.  
31  
32  
33  
34  
35

36  
37 Several statistically significant relationships between missing data strategy and time  
38  
39 emerged, as displayed in Table 4. Specifically, censored at end of FU (for survival analyses), last  
40  
41 observation carried forward (LOCF), and using a statistical analysis to interpolate missing data  
42  
43 (Interpolation, e.g., mixed effects model interpolation) have become more common over time,  
44  
45 whereas analyses conducted on only the samples of participants that the researchers were able to  
46  
47 follow-up (Sample FU) has become less common. To explore whether increasing use of certain  
48  
49 missing data strategies over time was confounded with longitudinal methods being increasingly  
50  
51 employed, a proxy dummy control variable (0=only end-of treatment assessment, 1=  
52  
53  
54  
55  
56  
57  
58  
59  
60



1  
2  
3 posttreatment and follow-up assessment(s)) was added to the analyses; the results were virtually  
4  
5 unchanged.  
6  
7  
8  
9  
10  
11  
12  
13  
14  
15  
16  
17  
18  
19  
20  
21  
22  
23  
24  
25  
26  
27  
28  
29  
30  
31  
32  
33  
34  
35  
36  
37  
38  
39  
40  
41  
42  
43  
44  
45  
46  
47  
48  
49  
50  
51  
52  
53  
54  
55  
56  
57  
58  
59  
60

For peer review only

Table 3. Change in true ITT analyses over time

|             | Estimate | SE   | t-value | P     |
|-------------|----------|------|---------|-------|
| (Intercept) | -1.52    | 0.64 | -2.39   | 0.02* |
| Year        | 0.04     | 0.02 | 1.85    | 0.06  |

Note: generalized linear model with binary outcome (ITT analyses conducted=1 or not=0). \*=p-value <.05  
k=165

Table 4. Change in missing data strategy over time

|                       | Estimate | SE   | z-value | P       |
|-----------------------|----------|------|---------|---------|
| Fail                  | 0.03     | 0.02 | 1.38    | 0.16    |
| All FU                | -0.10    | 0.09 | -1.18   | 0.24    |
| All FU (some dropout) | -0.09    | 0.06 | -1.43   | 0.15    |
| Baseline Assigned     | 0.47     | 0.36 | 1.31    | 0.19    |
| Censored (end of FU)  | 0.09     | 0.03 | 3.19    | <0.01*  |
| LOCF                  | 0.06     | 0.03 | 2.01    | 0.045*  |
| Grp Avg               | 0.07     | 0.12 | 0.62    | 0.54    |
| Mean FU points        | 0.07     | 0.07 | 0.92    | 0.36    |
| Other                 | 0.05     | 0.09 | 0.55    | 0.59    |
| Sample FU             | -0.10    | 0.02 | -4.40   | <0.001* |
| Interpolation         | 0.33     | 0.09 | 3.83    | <0.001* |
| Unclear               | 0.02     | 0.02 | 0.94    | 0.35    |

Note: generalized linear model with binary outcome.  
\*=p-value <.05

## Discussion

Across the 165 pharmacotherapy trials included in this analysis, less than half of the 74 studies reporting to have used an ITT strategy actually did so. This finding likely is due, at least in part, to a lack of a consensual definition of what constitutes an ITT analysis. In fact, the most common procedure for studies reporting, but not actually using an ITT, involved analyses on participants who completed a sufficient dose of treatment. That is, analyses were conducted on data for only those participants who completed a certain amount of treatment or who received a minimum intervention. This type of analysis is generally considered a "per protocol" approach, which contrasts to an ITT approach which includes outcome data for all participants, regardless of adherence to treatment [2].

Among the studies conducting a true ITT strategy, it was unclear what missing data strategy was used in nearly 25% of these studies. Lack of clarity in journal articles about how missing data were handled makes it difficult for readers to critically assess the study findings. A per protocol analysis answers questions of an explanatory nature, e.g., "how efficacious is this treatment for those adherent to the treatment?" In contrast, an ITT analysis provides more realistic (and usually less biased) estimates of the average treatment effects in the "real-world," as it accounts for both patient dropout and non-adherence to treatment. If findings from a per protocol analysis are incorrectly perceived as coming from an ITT analysis, treatment effects under more routine conditions of care will be overestimated. Journal editors and peer reviewers should be attentive to these issues and request that authors provide a clear description of the sample analyzed (i.e., ITT, modified ITT, per protocol) in their studies, along with details regarding how missing data were handled.

1  
2  
3 Because missing data strategies are becoming more sophisticated and are being facilitated  
4 by computer technology that is easily able to process data using complex algorithms, the  
5 diversity of missing data strategies that are employed is increasing. Indeed, our findings indicate  
6 that more complex imputation or interpolation procedures are becoming more prevalent over  
7 time. One such imputation procedure is Multiple Imputation, [3] which involves a Bayesian  
8 estimation procedure to average outcomes across multiple imputed datasets. Missing data are  
9 then replaced with a probable value based on other available variables in the data. Presumably,  
10 the results with this approach more closely approximate the results of an ITT analysis with 100%  
11 follow-up than any other method of handling missing data that is currently available.  
12  
13  
14  
15  
16  
17  
18  
19  
20  
21  
22  
23

## 24 **Conclusion**

25  
26  
27 Discrepancies in reporting versus actually conducting true ITT analyses were apparent in  
28 this body of alcohol pharmacotherapy trials. Lack of clarity regarding the missing data strategy  
29 used also was common. The degree to which these problems are present in reports of trials of  
30 pharmacotherapies and psychosocial interventions for other conditions remains to be determined.  
31  
32 In addition, consensus on a standard definition of ITT is needed, as are clearer reporting  
33 standards for analyses and the handling of missing data in reports of clinical trials.  
34  
35  
36  
37  
38  
39  
40  
41  
42  
43  
44  
45  
46  
47  
48  
49  
50  
51  
52  
53  
54  
55  
56  
57  
58  
59  
60

## Acknowledgments

Preparation of this manuscript was supported by U.S. National Institute on Alcohol Abuse and Alcoholism Grant No. AA008689 and the U.S. Department of Veterans Affairs, Office of Research and Development, Health Services Research and Development Service and Substance Use Disorder Quality Enhancement Research Initiative. The views expressed are those of the authors and do not necessarily represent the views of the National Institute on Alcohol Abuse and Alcoholism, the Department of Veterans Affairs, or any other U.S. Government entity.

## Ethics

No ethics approval was required for completion of this study. It aggregated previously published journal articles.

## Funding

U.S. National Institute on Alcohol Abuse and Alcoholism Grant No. AA008689 and the U.S. Department of Veterans Affairs, Office of Research and Development, Health Services Research and Development Service and Substance Use Disorder Quality Enhancement Research Initiative funded this research.

## Competing interest

There are no competing interests.

## Data sharing

No additional data available.

## ICMJE uniform disclosure

All authors have completed the ICMJE uniform disclosure form at [www.icmje.org/coi\\_disclosure.pdf](http://www.icmje.org/coi_disclosure.pdf) and declare: no support from any organization for the

1  
2  
3 submitted work; no financial relationships with any organizations that might have an interest in  
4  
5 the submitted work in the previous three years; no other relationships or activities that could  
6  
7 appear to have influenced the submitted work.  
8  
9

### 10 **Contributorship Information**

11  
12 A. C. Del Re was involved in the study's design, analysis and interpretation of data,  
13  
14 drafting the article and revising it. Natalya C. Maisel was involved in the study's design and  
15  
16 revising the article. Janet Blodgett was involved in the study's design. John W. Finney was  
17  
18 involved in the study's conception and design, interpretation of data, and revising it critically for  
19  
20 important intellectual content. All authors gave final approval of the version to be published.  
21  
22  
23

### 24 **Copyright/license for publication**

25  
26  
27 The Corresponding Author has the right to grant on behalf of all authors and does grant  
28  
29 on behalf of all authors, a worldwide license to the Publishers and its licensees in perpetuity, in  
30  
31 all forms, formats and media (whether known now or created in the future), to i) publish,  
32  
33 reproduce, distribute, display and store the Contribution, ii) translate the Contribution into other  
34  
35 languages, create adaptations, reprints, include within collections and create summaries, extracts  
36  
37 and/or, abstracts of the Contribution, iii) create any other derivative work(s) based on the  
38  
39 Contribution, iv) to exploit all subsidiary rights in the Contribution, v) the inclusion of electronic  
40  
41 links from the Contribution to third party material where-ever it may be located; and, vi) license  
42  
43 any third party to do any or all of the above.  
44  
45  
46  
47  
48  
49  
50  
51  
52  
53  
54  
55  
56  
57  
58  
59  
60

- 1 Gupta SK. Intention-to-treat concept: A review. *Perspect Clin Res* 2011;**2**:109–12. doi:10.4103/2229-3485.83221
- 2 Hollis S, Campbell F. What is meant by intention to treat analysis? Survey of published randomised controlled trials. *Bmj* 1999;**319**:670–4.
- 3 Little RJ, Rubin DB. *Statistical analysis with missing data*. Wiley New York 1987.
- 4 Ruiz-Canela M, Martínez-González MA, de Irala-Estévez J. Intention to treat analysis is related to methodological quality. *BMJ* 2000;**320**:1007.
- 5 Moher D, Schulz K, Altman D. The CONSORT statement: revised recommendations for improving the quality of reports of parallel group randomized trials. *BMC Med Res Methodol* 2001;**1**:2.
- 6 Schulz KF, Altman DG, Moher D. CONSORT 2010 statement: updated guidelines for reporting parallel group randomised trials. *Int J Surg* Published Online First: 2011. <http://www.sciencedirect.com/science/article/pii/S1743919111005620> (accessed 6 Mar2013).
- 7 Zwarenstein M, Treweek S, Gagnier JJ, *et al*. Improving the reporting of pragmatic trials: an extension of the CONSORT statement. *BMJ* Published Online First: 2008. <http://www.ncbi.nlm.nih.gov/pmc/articles/PMC3266844/> (accessed 6 Mar2013).
- 8 Polit DF, Gillespie BM. Intention-to-treat in randomized controlled trials: recommendations for a total trial strategy. *Res Nurs Health* 2010;**33**:355–68.
- 9 Schulz KF, Grimes DA. Sample size slippages in randomised trials: exclusions and the lost and wayward. *The Lancet* 2002;**359**:781–5.
- 10 Avins AL, Pressman A, Ackerson L, *et al*. Placebo Adherence and Its Association with Morbidity and Mortality in the Studies of Left Ventricular Dysfunction. *J Gen Intern Med* 2010;**25**:1275–81. doi:10.1007/s11606-010-1477-8
- 11 Granger AL, Fehnel SE, Hogue SL, *et al*. An assessment of patient preference and adherence to treatment with Wellbutrin SR: A web-based survey. *J Affect Disord* 2006;**90**:217–21. doi:10.1016/j.jad.2005.08.018
- 12 Schwartz D, Lellouch J. Explanatory and pragmatic attitudes in therapeutical trials. *J Clin Epidemiol* 2009;**62**:499–505.
- 13 Maisel NC, Blodgett JC, Wilbourne PL, *et al*. Meta-analysis of naltrexone and acamprosate for treating alcohol use disorders: when are these medications most helpful? *Addiction* 2013;**108**:275–93. doi:10.1111/j.1360-0443.2012.04054.x

1  
2  
3  
4  
5  
6  
7  
8  
9 Intention-to-Treat Analyses and Missing Data Approaches in Pharmacotherapy Trials for  
10  
11 Alcohol Use Disorders

12  
13 A. C. Del Re, Natalya C. Maisel, Janet C. Blodgett, John W. Finney

14  
15  
16 Research Health Science Specialist, Center for Health Care Evaluation, VA Palo Alto Health  
17 Care System (152MPD), 795 Willow Rd, Menlo Park, CA 94025, aaron.delre@va.gov, 650-493-  
18 5000 x2-25842, Fax: 650- 617-2736, A. C. Del Re

19  
20 Research Health Science Specialist, Center for Health Care Evaluation, VA Palo Alto Health  
21 Care System (152MPD), 795 Willow Rd, Menlo Park, CA 94025, natalya.maisel@va.gov, 650-  
22 493-5000 x2-26966, Natalya C. Maisel

23  
24 Research Associate, Center for Health Care Evaluation, VA Palo Alto Health Care System  
25 (152MPD), 795 Willow Rd, Menlo Park, CA 94025, janet.blodgett@va.gov, 650-493-5000 x2-  
26 27292, Janet Blodgett

27  
28 Research Health Science Specialist, Center for Health Care Evaluation, VA Palo Alto Health  
29 Care System (152MPD), 795 Willow Rd, Menlo Park, CA 94025, john.finney@va.gov, (650)  
30 493-5000 x2-22848, John W. Finney

31  
32 Correspondence to: A. C. Del Re aaron.delre@va.gov

33  
34 Keywords: intention to treat, missing data strategies, research methods

35  
36 Word count: 3,557, abstract: 298, references: 12, figures: 1, tables: 4  
37  
38  
39  
40  
41  
42  
43  
44  
45  
46  
47  
48  
49  
50  
51  
52  
53  
54  
55  
56  
57  
58  
59  
60



1  
2  
3  
4  
5  
6  
7  
8  
9  
10  
11  
12  
13  
14  
15  
16  
17  
18  
19  
20  
21  
22  
23  
24  
25  
26  
27  
28  
29  
30  
31  
32  
33  
34  
35  
36  
37  
38  
39  
40  
41  
42  
43  
44  
45  
46  
47  
48  
49  
50  
51  
52  
53  
54  
55  
56  
57  
58  
59  
60

## Abstract

*Objectives:* Intention-to-treat (ITT) is an analytic strategy for reducing potential bias in treatment effects arising from missing data in randomized controlled trials (RCT). Currently, no universally accepted definition of ITT exists, although many researchers consider it to require either no attrition or ~~some imputation procedure~~ a strategy to ~~account for~~ handle missing ~~outcome~~ data ~~in analyses~~. Using the reports of a large pool of randomized controlled trials, we examined discrepancies between the types of analyses that alcohol pharmacotherapy researchers stated they used versus those they actually used. We also examined the linkage between analytic strategy (i.e., ITT or not) and how missing data on outcomes were handled (if at all), and whether data analytic and missing data strategies have changed over time.

*Design:* Descriptive statistics were generated for reported and actual data analytic strategy and for missing data strategy. In addition, generalized linear models determined changes over time in the use of ITT analyses and missing data strategies.

*Setting:* N/A

*Participants:* 165 RCTs of pharmacotherapy for alcohol use disorders.

*Primary and secondary outcome measures:* N/A

*Results:* Of the 165 studies, 74 reported using an ITT strategy. However, less than 40% of the studies actually conducted ITT according to the rigorous definition above. Whereas no change in the use of ITT analyses over time was found, censored (last follow-up completed) and imputed missing data strategies have increased over time, while analyses of data only for the sample actually followed have decreased.

*Conclusions:* Discrepancies in reporting versus actually conducting ITT analyses were found in this body of RCTs. Lack of clarity regarding the missing data strategy used was common.

Consensus on a definition of ITT is important for adequate understanding of research findings.

1  
2  
3  
4  
5  
6  
7  
8  
9  
10  
11  
12  
13  
14  
15  
16  
17  
18  
19  
20  
21  
22  
23  
24  
25  
26  
27  
28  
29  
30  
31  
32  
33  
34  
35  
36  
37  
38  
39  
40  
41  
42  
43  
44  
45  
46  
47  
48  
49  
50  
51  
52  
53  
54  
55  
56  
57  
58  
59  
60

Clearer reporting standards for analyses and the handling of missing data in pharmacotherapy trials and other intervention studies are needed.

#### Strengths

- Examined a large body of RCT pharmacotherapy trials for alcohol misuse.
- Findings important for improving reporting practices in RCTs of pharmacotherapy trials for alcohol misuse.

#### Limitations

- Descriptive analyses could not determine whether there is any relationship between ITT and effect sizes.

1  
2  
3  
4  
5  
6  
7  
8  
9 In pharmacotherapy trials, participants typically are randomly assigned to a  
10 pharmacotherapy or a placebo (control) condition. With a sufficient sample size, randomization  
11 usually produces separate groups *without* systematic differences by equalizing factors within  
12 groups that may be associated with outcome (e.g., motivation, age, gender). Under ideal  
13 circumstances, the randomization process allows valid causal inferences to be made about the  
14 impact of the pharmacotherapy compared to the control condition. That is, one can be highly  
15 confident that any post-treatment differences in outcome are attributable to the impact of the  
16 medication itself and not to pre-existing differences in the characteristics of the pharmacotherapy  
17 and placebo samples. However, when the randomization process is disrupted, either through  
18 treatment dropout and/or missing data on outcomes, or when the original sample as randomized  
19 is not the same sample analyzed (analyzed N < randomized N), bias may be introduced that  
20 compromises the internal validity of results. [1–4]  
21

22 The intention-to-treat (ITT) analytic strategy is one solution for eliminating or reducing  
23 bias in treatment effects arising from missing outcome data in randomized controlled trials  
24 (RCTs). [1,2] Although no universally accepted definition of ITT currently exists, the procedure  
25 nevertheless is endorsed in the Consolidated Standards for Reporting Trials (CONSORT). [5–7]  
26 One particularly succinct definition of a "true ITT" [8] analysis is "once randomized, always  
27 analyzed." [9] Under this definition, ITT involves analysis of *all* trial participants who were  
28 randomized, regardless of adherence to treatment protocol (e.g., dropout/withdrawal or protocol  
29 deviations). In other words, defined this way, ITT requires either no attrition or ~~some imputation~~  
30 ~~procedure~~ strategy to ~~account for any~~ handle missing data.  
31

32 ITT has several strengths, including (1) helping to preserve the integrity of the  
33 randomization process (i.e., groups are expected to be similar except for random variation and  
34  
35  
36  
37  
38  
39  
40  
41  
42  
43  
44  
45  
46  
47  
48  
49  
50  
51  
52  
53  
54  
55  
56  
57  
58  
59  
60

1  
2  
3  
4  
5  
6  
7  
8  
9 receipt of treatment/control condition) and (2) providing a more realistic estimate of average  
10 treatment effects in the "real-world" as it is the norm for some patients to dropout or not adhere  
11 to treatment. [1] Both points above address the issue of patient dropout, as analyses on only  
12 adherent patients likely would lead to inflated estimates of treatment effects. Research has shown  
13 that adherent patients generally do better than non-adherent patients, regardless of treatment.  
14 [10,11] The more realistic estimates of treatment effects under conditions of routine care that are  
15 derived from ITT analyses have particular relevance for policy makers and those interested in  
16 hypotheses of pragmatic ("real world") importance.  
17

18  
19  
20  
21  
22  
23  
24 A variant of the ITT approach, what Polit and Gillespie (2010) term a "modified ITT"  
25 analysis, maintains the conditions to which people were randomly assigned and attempts to  
26 follow-up all participants, regardless of their participation in the intervention. However, only  
27 those successfully followed are included in the analyses. With this modified approach, however,  
28 the balance in pre-existing characteristics across conditions sought through random assignment is  
29 less likely to hold.  
30  
31  
32  
33  
34

35  
36 An alternative to ITT analysis, the *per protocol* analytic procedure (i.e., analyses based  
37 on only "adherent" participants in randomized samples), has strengths as well and is of particular  
38 importance for hypotheses of an explanatory nature.[12] The per protocol approach can range  
39 from analyses in which only those research participants who began treatment are included, to  
40 those in which only participants who received what was deemed a "sufficient dose" of treatment  
41 are used, to those in which only participants who fully completed treatment are included ~~also~~  
42 referred to as a 'complete cases' approach [also referred to as a 'complete cases' approach; 2].  
43  
44  
45  
46  
47  
48  
49  
50  
51  
52  
53  
54  
55  
56  
57  
58  
59  
60

1  
2  
3  
4  
5  
6  
7  
8  
9 intervention when used as directed (i.e., efficacy among those who are adherent and able to  
10 tolerate the treatment).  
11

12 Because both ITT and per protocol approaches to RCT analyses have their strengths, a  
13 possible strategy is to conduct an ITT analysis, with a per protocol sensitivity analysis to  
14 “bracket” likely effects under different conditions. Nevertheless, ITT analyses are considered  
15 the “gold standard” and researchers frequently report the use of this procedure in published  
16 literature, even in the absence of a consensual definition. Discrepancies can arise, however,  
17 between the type of analyses researchers state in research reports that they conducted and what  
18 they *actually* did with respect to use of a “true” ITT analysis or some other procedure based on  
19 less than the full randomized sample. For example, in clinical trials in the nursing field, Polit  
20 and Gillespie (2009) found that for 10.5% of studies, researchers who stated they had used an  
21 ITT approach had actually conducted per protocol analyses.  
22  
23  
24  
25  
26  
27  
28  
29  
30

31 It is unknown to what degree ITT strategies are being employed in pharmacotherapy for  
32 alcohol use disorders. One aim of this review was to determine if there are discrepancies between  
33 the types of analyses that researchers stated they used and those they actually used, based on  
34 information in reports of a large pool of randomized controlled trials of pharmacotherapy for  
35 alcohol use disorders published between 1970 to 2009. A second aim was to describe the use of  
36 different missing data strategies in studies in which true and modified ITT analyses were and  
37 were not conducted. The final aim was to determine whether the use of different data analytic  
38 approaches and certain types of missing data approaches (e.g., multiple imputation) has  
39 increased over time while the use of others has decreased.  
40  
41  
42  
43  
44  
45  
46  
47

## 48 **Methods**

### 49 **Literature Search**

50  
51  
52  
53  
54  
55  
56  
57  
58  
59  
60

1  
2  
3  
4  
5  
6  
7  
8  
9  
10  
11  
12  
13  
14  
15  
16  
17  
18  
19  
20  
21  
22  
23  
24  
25  
26  
27  
28  
29  
30  
31  
32  
33  
34  
35  
36  
37  
38  
39  
40  
41  
42  
43  
44  
45  
46  
47  
48  
49  
50  
51  
52  
53  
54  
55  
56  
57  
58  
59  
60

As part of a larger project examining the efficacy of pharmacotherapies for alcohol use disorders and alcohol misuse, [i.e., 13] we identified relevant randomized controlled trials via several searches of PubMed and PsycINFO conducted at different points over the past decade. Study inclusion criteria were (a) a focus on treating alcohol misuse or an alcohol use disorder; (b) participants 18 years of age or older; (c) publication between 1970 and 2009; (d) a report in the English language; and (e) random assignment of at least five participants each to medication and placebo groups. The details of inclusion/exclusion criteria can be found in Maisel et al.[12]

Searches were intermittent due to sporadic availability of funds and resources. For example, in one search we used search terms for various medications (e.g., “naltrexone”), terms for alcohol problems and use disorders and alcohol misuse (e.g., “alcohol\*,” “problem drinking”) and terms for randomized controlled trials (e.g., “randomized controlled,” “clinical trial”). This search yielded 1,602 potential research reports. Based on examination of abstracts and, in some cases, full text versions of these reports, 1,184 were identified as not relevant (e.g., qualitative studies, reviews). Of the remaining articles, 215 were rejected based on not meeting our eligibility criteria (e.g., open-label trial), 138 articles met the inclusion criteria, but 65 were additional publications for studies already in the dataset (e.g., reporting secondary analyses). In addition to the database searches, we ~~perused~~perused the reference sections from the reports of the included studies and from previously published reviews of this literature. For the present analysis, a total of 165 studies met our inclusion criteria

### Variables

Descriptive and inferential statistics were generated for two categorical variables: (1) sample analyzed and (2) missing data strategy. The categories of the “sample analyzed” variable were:

- 1  
2  
3  
4  
5  
6  
7  
8  
9 (1) Full random sample - analyses involved the total randomized N's (with or without  
10 imputation or interpolation of missing data).
- 11  
12  
13 (2) Full random sample (likely) - analyses appeared to use the full randomized sample,  
14 but N's were not reported.
- 15  
16  
17 (3) Random sample followed-up - attempted to follow-up all randomized participants,  
18 regardless of amount of medication/treatment completed and conducted analyses on this  
19 sample. Note there is no overlap between categories 1 ("Full random sample") or 2 ("Full  
20 random sample (likely)") and "Random sample followed-up".
- 21  
22  
23 (4) Sufficient dose - analyses were conducted for only those participants who completed  
24 a specified amount of treatment or who received at least a minimum dose of treatment.
- 25  
26  
27 (5) Completer sample - analyses conducted for only those patients who completed the  
28 medication/treatment phase.
- 29  
30  
31 (6) False inclusion - after randomization, participants were found to not meet inclusion  
32 criteria and were subsequently removed from the analyses.
- 33  
34  
35 (7) Other - reported N's or degrees of freedom that were less than what would be  
36 expected for the randomized N, but no explanation of the participants included or  
37 excluded from the analysis was provided.
- 38  
39  
40 (8) Unclear – insufficient information was provided to determine the sample analyzed.

41  
42 Only analyses conducted on the Full Random Sample or Full Random Sample (likely) categories  
43 were deemed to be “true” ITT analyses, whereas the others were considered something other  
44 than ITT analyses.

45  
46  
47 The categories for the “missing data strategy” variable were as follows:

- 48  
49  
50 (1) No dropout – no dropout from treatment and 100% reassessed.
- 51  
52  
53  
54  
55  
56  
57  
58  
59  
60

- 1  
2  
3  
4  
5  
6  
7  
8  
9 (2) All followed - there were drop-outs from treatment, but all participants, including  
10 treatment dropouts, were reassessed.  
11  
12 (3) Statistical ~~imputation or~~ interpolation - used a statistical analysis that ~~imputed or~~  
13 interpolated missing data, e.g., mixed-effects model interpolation.  
14  
15 (4) Failure assumed for missing data (missing = failure) - assumed that missing data  
16 reflected poor outcome, e.g., relapse.  
17  
18 (5) Baseline assigned - a participant's baseline score was assigned if outcome data were  
19 missing.  
20  
21 (6) LOCF - used the imputation strategy of Last Observation Carried Forward.  
22  
23 (7) Censored – last assessment point was used in survival analyses.  
24  
25 (8) Mean - used the mean of the sample followed for missing data.  
26  
27 (9) Other – used some other imputation of missing data strategy.  
28  
29 (10) Sample followed - conducted analyses with data for the sample of participants that  
30 the researchers were able to follow/reassess.  
31  
32 (11) Unclear - no or unclear information provided.  
33  
34  
35  
36

### Statistical Analyses

37  
38  
39 Descriptive statistics were generated for data analytic strategies and missing data  
40 strategies used in the 165 RCTs of pharmacotherapies for AUD and alcohol misuse. Generalized  
41 linear model analyses were conducted to determine changes in both data analytic and missing  
42 data strategy over time. In those analyses, the response variables, data analytic strategy and  
43 missing data strategy, were coded as binary (0='No', 1='Yes'), with year of publication as  
44 predictor of a 'Yes' response.  
45  
46  
47  
48  
49

### Results



1  
2  
3  
4  
5  
6  
7  
8  
9 As noted in Table 1, a substantial discrepancy was evident between reporting an ITT  
10 strategy versus actually conducting a “true” ITT analysis (i.e., reporting an ITT strategy when  
11 something other than ITT was conducted). Of the 165 studies included in this review, 74  
12 reported using an ITT strategy. However, less than half of those studies conducted a true ITT  
13 analysis ( $K=29$ ; 39%) according to information in study reports. Interestingly, 35% ( $K=32$ ) of the  
14 91 studies whose reports made *no* claim of using an ITT strategy, in fact, *did* perform true ITT  
15 analyses.  
16  
17  
18  
19  
20  
21  
22  
23  
24  
25  
26  
27  
28  
29  
30  
31  
32  
33  
34  
35  
36  
37  
38  
39  
40  
41  
42  
43  
44  
45  
46  
47  
48  
49  
50  
51  
52  
53  
54  
55  
56  
57  
58  
59  
60

Table 1.

| Reported Using ITT      | Conducted True ITT <sup>a</sup> | Sample Analyzed    |                             |                  |                 |                  |                 |           |             | Total Number of IIT and/or Non-IIT Approaches Used |
|-------------------------|---------------------------------|--------------------|-----------------------------|------------------|-----------------|------------------|-----------------|-----------|-------------|----------------------------------------------------|
|                         |                                 | Full Random Sample | Full Random Sample (likely) | Random Sample FU | Sufficient Dose | Completer Sample | False Inclusion | Other     | Unclear     |                                                    |
| <b>No</b><br>(K=91)     | 32<br>(35%)                     | 28<br>(25%)        | 4<br>(4%)                   | 6<br>(5%)        | 19<br>(17%)     | 31<br>(28%)      | 2<br>(2%)       | 4<br>(4%) | 16<br>(14%) | 112                                                |
| <b>Yes</b><br>(K=74)    | 29<br>(39%)                     | 21<br>(21%)        | 9<br>(9%)                   | 7<br>(7%)        | 40<br>(39%)     | 7<br>(7%)        | 8<br>(8%)       | 2<br>(2%) | 0<br>(0%)   | 102                                                |
| <b>Total</b><br>(K=165) | 61<br>(37%)                     | 49<br>(23%)        | 13<br>(6%)                  | 13<br>(6%)       | 59<br>(28%)     | 38<br>(18%)      | 10<br>(5%)      | 6<br>(3%) | 16<br>(8%)  | 214                                                |

Note: <sup>a</sup>ITT=Full Random Sample or Full Random Sample (likely) categories; K=study, column description: (1) Full random sample (analyses involved the total randomized N's), (2) Full random sample (likely) (appears to be using the full randomized sample, but N's are not reported with analyses), (3) Random sample followed-up (attempted to follow-up all randomized participants regardless of amount of medication/treatment completed, and conducted analyses on this sample), (4) Sufficient dose (analyses conducted on only those participants who received a minimum amount of medication/treatment), (5) Completer sample (analyses conducted on only those patients who completed the medication/treatment phase), (6) False inclusion (after randomization, participant is found to not meet inclusion criteria and is subsequently removed from the analyses), (7) Other (analyses report N's or degrees of freedom that are less than what would be expected for the randomized N, but no explanation on the participants included or excluded from the analysis is provided), and (8) Unclear (insufficient information to determine the sample analyzed). Only categories (1) Full random sample and (2) Full random sample (likely) are considered a "true" ITT strategy, whereas the others are considered something other than ITT.

1  
2  
3  
4  
5  
6  
7  
8  
9  
10  
11 Regarding the specific data analytic strategy used, the values in each row of Table 1 do  
12 not sum to the total number of studies in the first column (i.e., "Reported Using ITT") due to 45  
13 studies utilizing both ITT and non-ITT analyses (e.g., conducted an ITT analysis assuming  
14 failure for dichotomous outcomes AND also used a complete cases approach for continuous  
15 outcomes). In such instances, we coded "Reported Using ITT" as "Yes" if the study mentioned  
16 using an ITT strategy and coded it as "No" otherwise (i.e., no mention of using an ITT strategy).  
17  
18  
19  
20  
21

22 The most common approach utilized in studies reporting the use of an ITT strategy, other  
23 than use of a true ITT ( $K=29$ ; 39%), involved analyses of data for participants who completed a  
24 "sufficient dose" of the medication/treatment ( $K=40$ ; 39%). All other strategies were utilized  
25 <10% of the time. The most common analytic method used in studies not mentioning an ITT  
26 strategy was actually a true ITT analysis ( $K=32$ ; 29%), followed by analyses of data from  
27 completer samples ( $K=31$ ; 28%), analyses for participants who completed a "sufficient dose" of  
28 medication/treatment ( $K=19$ ; 17%), and indeterminable strategies (i.e., Unclear;  $K=16$ ; 14%).  
29  
30  
31  
32  
33  
34

35 Table 2 reports the descriptive information on the missing data strategies employed in the  
36 studies using and not using a true ITT approach. Similar to Table 1, the values in each row of  
37 Table 2 do not sum to the total number of studies in the first column (i.e., "Conducted ITT") due  
38 to 42 studies utilizing multiple missing data strategies. The most common missing data strategy  
39 utilized in studies employing an ITT approach was either unclear ( $K=24$ ; 23%) or involved  
40 censoring data at the end of FU procedure in survival analyses ( $K=23$ ; 22%). A study could be  
41 categorized as employing an ITT strategy, but having an unclear missing data strategy if, for  
42 example, the study reported the full randomized  $N$ s from analyses, but it was unclear what  
43 particular missing data strategy was utilized. The next most frequently used strategies were  
44  
45  
46  
47  
48  
49  
50  
51  
52  
53  
54  
55  
56  
57  
58  
59  
60

1  
2  
3  
4  
5  
6  
7  
8  
9  
10  
11  
12  
13  
14  
15  
16  
17  
18  
19  
20  
21  
22  
23  
24  
25  
26  
27  
28  
29  
30  
31  
32  
33  
34  
35  
36  
37  
38  
39  
40  
41  
42  
43  
44  
45  
46  
47  
48  
49  
50  
51  
52  
53  
54  
55  
56  
57  
58  
59  
60

assuming missing equals relapse or some other poor outcome (“Failure”;  $K=14$ ; 13%) and using a statistical ~~imputation or~~ interpolation strategy ( $K=14$ ; 13%), such as a mixed effects model. All other missing data strategies were utilized  $\leq 10\%$  of the time, except the last observation carried forward (LOCF) procedure that was used in ( $K=12$ ) 11% of the studies.

Table 2.

| Conducted True ITT   | Missing Data Strategy |                          |                                        |                   |                   |          |                                        |                  |        |           |          | Total Number of ITT and/or Non-ITT Approaches Used |
|----------------------|-----------------------|--------------------------|----------------------------------------|-------------------|-------------------|----------|----------------------------------------|------------------|--------|-----------|----------|----------------------------------------------------|
|                      | No Tx or FU Dropout   | All FU (some tx dropout) | <del>Imputation or</del> Interpolation | Missing = Failure | Baseline Assigned | LOCF     | Censored (end of FU) Survival Analysis | Mean Substituted | Other  | Sample FU | Unclear  |                                                    |
| <b>No (K=104)</b>    | 0                     | 0                        | 6 (4%)                                 | 23 (17%)          | 1 (1%)            | 22 (16%) | 25 (18%)                               | 3 (2%)           | 2 (1%) | 38 (27%)  | 17 (12%) | 139                                                |
| <b>Yes (K=61)</b>    | 1 (1%)                | 2 (2%)                   | 14 (13%)                               | 14 (13%)          | 1 (1%)            | 12 (11%) | 23 (22%)                               | 2 (2%)           | 1 (1%) | 11 (10%)  | 24 (23%) | 105                                                |
| <b>Total (K=165)</b> | 1 (>1%)               | 2 (>1%)                  | 20 (07%)                               | 37 (16%)          | 2 (>1%)           | 34 (13%) | 48 (19%)                               | 5 (2%)           | 3 (1%) | 49 (19%)  | 41 (16%) | 259 <sup>a</sup>                                   |

Note. Column description: (1) No dropout, (2) Followed-up (some dropout) (there were drop-outs from treatment, but all participants, including dropouts were followed-up), (3) ~~Imputation or~~ Interpolation (used a statistical analysis that interpolated missing data, e.g., mixed-effects model interpolation), (4) Failure (assumed that missing data = failure, e.g., relapse), (5) Baseline assigned (assigned a person's baseline score if the outcome score was missing), (6) LOCF (used an imputation strategy of Last Observation Carried Forward), (7) Censored (end of FU) (data presented in a survival analysis), (8) Mean (used the mean for each person across available assessments/timepoints), (9) Other (other imputation strategy), (10) Sample FU (conducted analyses on the sample of participants that the researchers was able to follow-up), (11) Unclear (no information provided/unclear).

1  
2  
3  
4  
5  
6  
7  
8  
9  
10  
11  
12  
13  
14  
15  
16  
17  
18  
19  
20  
21  
22  
23  
24  
25  
26  
27  
28  
29  
30  
31  
32  
33  
34  
35  
36  
37  
38  
39  
40  
41  
42  
43  
44  
45  
46  
47  
48  
49  
50  
51  
52  
53  
54  
55  
56  
57  
58  
59  
60

The most common missing data method utilized in studies not conducting a true ITT analysis was analyzing the sample followed-up ( $K=38$ ; 27%), followed by censoring at the end of FU procedure ( $K=25$ ; 18%), assuming failure (“Failure”;  $K=23$ ; 17%), last observation carried forward ( $K=23$ ; 16%) and an unclear strategy ( $K=17$ ; 12%). All other missing data strategies were used  $\leq 10\%$  of the time. A study could be categorized as *not* employing an ITT strategy, but still using a missing data strategy of assuming failure or last observation carried forward if, for example, the study assumed failure for missing participants, but something less than the full randomized  $N$ s were reported for analyses. Tables 3 and 4 display changes in ITT analyses and missing data strategies over time. No statistically significant change (although marginally significant trend) was found in use of true ITT analyses over time (Table 3). This relationship is depicted graphically with time on the  $x$ -axis, probability (of being an ITT) from generalized linear model results on the  $y$ -axis, and raw study values (0= not ITT, 1=ITT) displayed as points. The 95% confidence intervals are displayed as a grey line around the probability slope.

Several statistically significant relationships between missing data strategy and time emerged, as displayed in Table 4. Specifically, censored at end of FU (for survival analyses), last observation carried forward (LOCF), and using a statistical analysis to ~~impute~~/interpolate missing data (~~Imputed/Interpolated~~Interpolation, e.g., mixed effects model interpolation) have become more common over time, whereas analyses conducted on only the samples of participants that the researchers were able to follow-up (Sample FU) has become less common. To explore whether increasing use of certain missing data strategies over time was confounded with longitudinal methods being increasingly employed, a proxy dummy control variable

1  
2  
3  
4  
5  
6  
7  
8  
9 (0=only end-of treatment assessment, 1= posttreatment and follow-up assessment(s)) was added  
10 to the analyses; the results were virtually unchanged.  
11  
12  
13  
14  
15  
16  
17  
18  
19  
20  
21  
22  
23  
24  
25  
26  
27  
28  
29  
30  
31  
32  
33  
34  
35  
36  
37  
38  
39  
40  
41  
42  
43  
44  
45  
46  
47  
48  
49  
50  
51  
52  
53  
54  
55  
56  
57  
58  
59  
60

For peer review only

Table 3. Change in true ITT analyses over time

|             | Estimate | SE   | t-value | P     |
|-------------|----------|------|---------|-------|
| (Intercept) | -1.52    | 0.64 | -2.39   | 0.02* |
| Year        | 0.04     | 0.02 | 1.85    | 0.06  |

Note: generalized linear model with binary outcome (ITT analyses conducted=1 or not=0). \*=p-value <.05  
k=165

Table 4. Change in missing data strategy over time

|                                        | Estimate | SE   | z-value | P       |
|----------------------------------------|----------|------|---------|---------|
| Fail                                   | 0.03     | 0.02 | 1.38    | 0.16    |
| All FU                                 | -0.10    | 0.09 | -1.18   | 0.24    |
| All FU (some dropout)                  | -0.09    | 0.06 | -1.43   | 0.15    |
| Baseline Assigned                      | 0.47     | 0.36 | 1.31    | 0.19    |
| Censored (end of FU)                   | 0.09     | 0.03 | 3.19    | <0.01*  |
| LOCF                                   | 0.06     | 0.03 | 2.01    | 0.045*  |
| Grp Avg                                | 0.07     | 0.12 | 0.62    | 0.54    |
| Mean FU points                         | 0.07     | 0.07 | 0.92    | 0.36    |
| Other                                  | 0.05     | 0.09 | 0.55    | 0.59    |
| Sample FU                              | -0.10    | 0.02 | -4.40   | <0.001* |
| <del>Imputation or</del> Interpolation | 0.33     | 0.09 | 3.83    | <0.001* |
| Unclear                                | 0.02     | 0.02 | 0.94    | 0.35    |

Note: generalized linear model with binary outcome.  
\*=p-value <.05

Formatted Table

Formatted Table



## Discussion

Across the 165 pharmacotherapy trials included in this analysis, less than half of the 74 studies reporting to have used an ITT strategy actually did so. This finding likely is due, at least in part, to a lack of a consensual definition of what constitutes an ITT analysis. In fact, the most common procedure for studies reporting, but not actually using an ITT, involved analyses on participants who completed a sufficient dose of treatment. That is, analyses were conducted on data for only those participants who completed a certain amount of treatment or who received a minimum intervention. This type of analysis is generally considered a "per protocol" approach, which contrasts to an ITT approach which includes outcome data for all participants, regardless of adherence to treatment [2].

Among the studies conducting a true ITT strategy, it was unclear what missing data strategy was used in nearly 25% of these studies. Lack of clarity in journal articles about how missing data were handled makes it difficult for readers to critically assess the study findings. A per protocol analysis answers questions of an explanatory nature, e.g., "how efficacious is this treatment for those adherent to the treatment?" In contrast, an ITT analysis provides more realistic (and usually less biased) estimates of the average treatment effects in the "real-world," as it accounts for both patient dropout and non-adherence to treatment. If findings from a per protocol analysis are incorrectly perceived as coming from an ITT analysis, treatment effects under more routine conditions of care will be overestimated. Journal editors and peer reviewers should be attentive to these issues and request that authors provide a clear description of the sample analyzed (i.e., ITT, modified ITT, per protocol) in their studies, along with details regarding how missing data were handled.

1  
2  
3  
4  
5  
6  
7  
8  
9  
10  
11  
12  
13  
14  
15  
16  
17  
18  
19  
20  
21  
22  
23  
24  
25  
26  
27  
28  
29  
30  
31  
32  
33  
34  
35  
36  
37  
38  
39  
40  
41  
42  
43  
44  
45  
46  
47  
48  
49  
50  
51  
52  
53  
54  
55  
56  
57  
58  
59  
60

Because missing data strategies are becoming more sophisticated and are being facilitated by computer technology that is easily able to process data using complex algorithms, the diversity of missing data strategies that are employed is increasing. Indeed, our findings indicate that more complex imputation or interpolation procedures are becoming more prevalent over time. One such imputation procedure is Multiple Imputation, [3] which involves a Bayesian estimation procedure to average outcomes across multiple imputed datasets. Missing data are then replaced with a probable value based on other available variables in the data. Presumably, the results with this approach more closely approximate the results of an ITT analysis with 100% follow-up than any other method of handling missing data that is currently available.

### Conclusion

Discrepancies in reporting versus actually conducting true ITT analyses were apparent in this body of alcohol pharmacotherapy trials. Lack of clarity regarding the missing data strategy used also was common. The degree to which these problems are present in reports of trials of pharmacotherapies and psychosocial interventions for other conditions remains to be determined. In addition, consensus on a standard definition of ITT is needed, as are clearer reporting standards for analyses and the handling of missing data in reports of clinical trials.

### Acknowledgments

Preparation of this manuscript was supported by U.S. National Institute on Alcohol Abuse and Alcoholism Grant No. AA008689 and the U.S. Department of Veterans Affairs, Office of Research and Development, Health Services Research and Development Service and Substance Use Disorder Quality Enhancement Research Initiative. The views expressed are those of the authors and do not necessarily represent the views of the National Institute on Alcohol Abuse and Alcoholism, the Department of Veterans Affairs, or any other U.S. Government entity.

1  
2  
3  
4  
5  
6  
7  
8  
9  
10  
11  
12  
13  
14  
15  
16  
17  
18  
19  
20  
21  
22  
23  
24  
25  
26  
27  
28  
29  
30  
31  
32  
33  
34  
35  
36  
37  
38  
39  
40  
41  
42  
43  
44  
45  
46  
47  
48  
49  
50  
51  
52  
53  
54  
55  
56  
57  
58  
59  
60

**Ethics**

No ethics approval was required for completion of this study. It aggregated previously published journal articles.

For peer review only



**ICMJE uniform disclosure**

All authors have completed the ICMJE uniform disclosure form at [www.icmje.org/coi\\_disclosure.pdf](http://www.icmje.org/coi_disclosure.pdf) and declare: no support from any organization for the submitted work; no financial relationships with any organizations that might have an interest in the submitted work in the previous three years; no other relationships or activities that could appear to have influenced the submitted work.

### Contributorship Information

A. C. Del Re was involved in the study's design, analysis and interpretation of data, drafting the article and revising it. Natalya C. Maisel was involved in the study's design and revising the article. Janet Blodgett was involved in the study's design. John W. Finney was involved in the study's conception and design, interpretation of data, and revising it critically for important intellectual content. All authors gave final approval of the version to be published.

**Copyright/license for publication**

The Corresponding Author has the right to grant on behalf of all authors and does grant on behalf of all authors, a worldwide license to the Publishers and its licensees in perpetuity, in all forms, formats and media (whether known now or created in the future), to i) publish, reproduce, distribute, display and store the Contribution, ii) translate the Contribution into other languages, create adaptations, reprints, include within collections and create summaries, extracts and/or, abstracts of the Contribution, iii) create any other derivative work(s) based on the Contribution, iv) to exploit all subsidiary rights in the Contribution, v) the inclusion of electronic links from the Contribution to third party material where-ever it may be located; and, vi) license any third party to do any or all of the above.

1  
2  
3  
4  
5  
6  
7  
8  
9  
10  
11  
12  
13  
14  
15  
16  
17  
18  
19  
20  
21  
22  
23  
24  
25  
26  
27  
28  
29  
30  
31  
32  
33  
34  
35  
36  
37  
38  
39  
40  
41  
42  
43  
44  
45  
46  
47  
48  
49  
50  
51  
52  
53  
54  
55  
56  
57  
58  
59  
60

- 1 Gupta SK. Intention-to-treat concept: A review. *Perspect Clin Res* 2011;**2**:109–12. doi:10.4103/2229-3485.83221
- 2 Hollis S, Campbell F. What is meant by intention to treat analysis? Survey of published randomised controlled trials. *Bmj* 1999;**319**:670–4.
- 3 Little RJ, Rubin DB. *Statistical analysis with missing data*. Wiley New York 1987.
- 4 Ruiz-Canela M, Martínez-González MA, de Irala-Estévez J. Intention to treat analysis is related to methodological quality. *BMJ* 2000;**320**:1007.
- 5 Moher D, Schulz K, Altman D. The CONSORT statement: revised recommendations for improving the quality of reports of parallel group randomized trials. *BMC Med Res Methodol* 2001;**1**:2.
- 6 Schulz KF, Altman DG, Moher D. CONSORT 2010 statement: updated guidelines for reporting parallel group randomised trials. *Int J Surg* Published Online First: 2011.<http://www.sciencedirect.com/science/article/pii/S1743919111005620> (accessed 6 Mar2013).
- 7 Zwarenstein M, Treweek S, Gagnier JJ, *et al*. Improving the reporting of pragmatic trials: an extension of the CONSORT statement. *BMJ* Published Online First: 2008.<http://www.ncbi.nlm.nih.gov/pmc/articles/PMC3266844/> (accessed 6 Mar2013).
- 8 Polit DF, Gillespie BM. Intention-to-treat in randomized controlled trials: recommendations for a total trial strategy. *Res Nurs Health* 2010;**33**:355–68.
- 9 Schulz KF, Grimes DA. Sample size slippages in randomised trials: exclusions and the lost and wayward. *The Lancet* 2002;**359**:781–5.
- 10 Avins AL, Pressman A, Ackerson L, *et al*. Placebo Adherence and Its Association with Morbidity and Mortality in the Studies of Left Ventricular Dysfunction. *J Gen Intern Med* 2010;**25**:1275–81. doi:10.1007/s11606-010-1477-8
- 11 Granger AL, Fehnel SE, Hogue SL, *et al*. An assessment of patient preference and adherence to treatment with Wellbutrin SR: A web-based survey. *J Affect Disord* 2006;**90**:217–21. doi:10.1016/j.jad.2005.08.018
- 12 Schwartz D, Lellouch J. Explanatory and pragmatic attitudes in therapeutical trials. *J Clin Epidemiol* 2009;**62**:499–505.
- 13 Maisel NC, Blodgett JC, Wilbourne PL, *et al*. Meta-analysis of naltrexone and acamprosate for treating alcohol use disorders: when are these medications most helpful? *Addiction* 2013;**108**:275–93. doi:10.1111/j.1360-0443.2012.04054.x
